# Supplementary material
Source: Royal Society of Chemistry journal article supplement (doi:10.1039/d6qo00271d)

## Supporting Information

### Thioacids-Catalyzed Selective Photochemical Oxidation Reactions under Mild Conditions

Wenjing Li,<sup>a,\*</sup> Chunye Liu,<sup>a</sup> Juan Tang,<sup>b</sup> Siyu Shen,<sup>a</sup> Lingling Liang,<sup>a</sup> Lingzhi Zhao,<sup>a</sup>  
and Shun Li<sup>b,\*</sup>

<sup>a</sup>School of Pharmacy, Xi'an Medical University, Xi'an, 710021, P. R. China.

<sup>b</sup>College of New Energy Materials and Chemistry, Leshan Normal University, Leshan, Sichuan, 614000, P. R. China.

E-mail: liwenjing@xiyi.edu.cn; lishun@lsnu.edu.cn

#### Table of Contents

|                                                                                                                                              |     |
|----------------------------------------------------------------------------------------------------------------------------------------------|-----|
| 1. General Remarks                                                                                                                           | S1  |
| 2. Setup for Photocatalytic Reactions                                                                                                        | S1  |
| 3. Optimization Results of the Reaction Conditions                                                                                           | S2  |
| 4. Experimental Procedures                                                                                                                   | S5  |
| 4.1 General Procedures <b>A</b> for the Oxidation of the Benzylic sp <sup>3</sup> C-H Bonds using Purple LED                                 | S5  |
| 4.2 General Procedures <b>B</b> for the Oxidation of Primary and Secondary Benzylic Alcohols using Blue LED                                  | S6  |
| 4.3 General Procedures <b>C</b> for the Oxidation of Substituted Benzylamines using Blue LED                                                 | S6  |
| 4.4 Scale-up Experiments                                                                                                                     | S7  |
| 5. Mechanism Research                                                                                                                        | S8  |
| 5.1 Radical Trapped Experiments                                                                                                              | S8  |
| 5.2 Electron Paramagnetic Resonance (EPR) study                                                                                              | S8  |
| 5.3 Emission Spectra of the Photocatalyst [A <sup>-</sup> ] <sup>*</sup> , [H <sup>-</sup> ] <sup>*</sup> and [N <sup>-</sup> ] <sup>*</sup> | S9  |
| 5.4 General Procedure for Cyclic Voltammetry (CV) Experiments                                                                                | S10 |
| 6. Characterization Data of Products                                                                                                         | S12 |
| 7. References                                                                                                                                | S28 |
| 8. NMR Spectra                                                                                                                               | S31 |

## 1. General Remarks

Unless otherwise noted, reagents, catalysts, and solvents were obtained from commercial suppliers and used without further purification. All substrates were used as received from commercial suppliers unless otherwise stated. Alkyl arenes, alcohols and amines were purchased from commercial suppliers, Adamas, Aladdin, TCI (Shanghai) Development Co., Ltd, Energy Chemical reagent suppliers, Alfa-Aesar and Sigma-Aldrich unless otherwise noted.

NMR spectra were recorded on a Bruker Avance 400 MHz spectrometer.  $^1\text{H}$  NMR,  $^{13}\text{C}$  NMR and  $^{19}\text{F}$  NMR are recorded on an NMR spectrometer with  $\text{CDCl}_3$  as solvent. Chemical shifts of  $^1\text{H}$ ,  $^{13}\text{C}$ , and  $^{19}\text{F}$  NMR spectra are reported in parts per million (ppm). The  $^{19}\text{F}$  NMR spectra is  $\{^1\text{H}\}$  decoupled and the  $^{13}\text{C}$  NMR spectra is  $\{^1\text{H}\}$  decoupled. The residual solvent signals were used as standard, and the chemical shifts were converted to the corresponding scale ( $\text{CDCl}_3$ :  $\delta \text{H} = 7.26$  ppm,  $\delta \text{C} = 77.16$  ppm). All coupling constants ( $J$  values) were reported in hertz (Hz). Multiplicities are reported as follows: singlet (s), doublet (d), triplet (t), quartet (q), and multiplet (m). All the experiments were monitored by analytical thin layer chromatography (TLC) performed on silica gel GF254 pre-coated plates. The UV-Vis spectra has been recorded on a UV-6000T spectrometer. Fluorescence quenching experiment was recorded using a Edinburgh FLS1000. Cyclic voltammetry was performed on an CHI660 electrochemical analyzer. Electron paramagnetic resonance (EPR) spectra was recorded on a Bruker EMXplus-6/1.

## 2. Setup for Photocatalytic Reactions

The photochemical setup is depicted in Fig. S1. Reaction Set-up for Irradiation of Mixture with Blue LED: A commercially available Blue LED (30 W,  $\lambda = 400\text{--}450$  nm)/Purple LED (30 W,  $\lambda = 365\text{--}370$  nm) purchased from Yi Tongchuang Technology Co., LTD: model 30w-30v-4240-B as the reaction light source. All the reactions were run in a 25 mL Quartz tubes equipped with magnetic stirring bar. The distance between the lamp and the Quartz tubes was set 6 cm. All the reactions were stirred at the speed of 300 rpm with external fan cooling so that the ambient temperature of the reaction vessel did not exceed 35 °C.

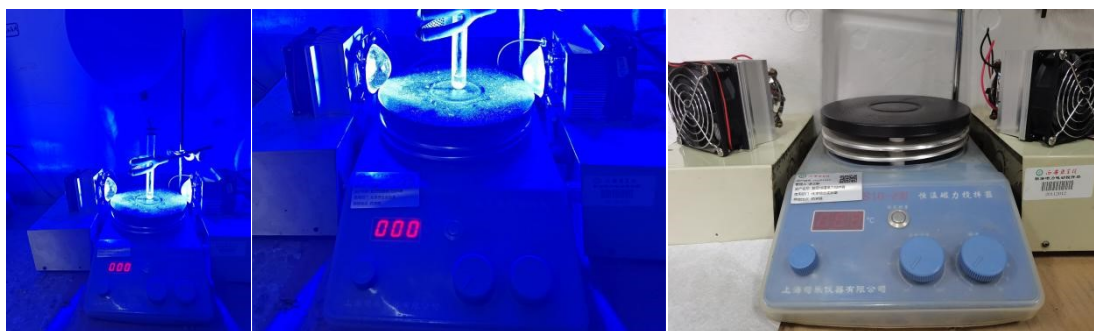

Fig. S1 LED reaction setup for photocatalytic reactions.

### 3. Optimization Results of the Reaction Conditions

Table S1. Screening of diphenylmethane photocatalytic oxidative coupling conditions—Evaluation of thioacids photocatalysts

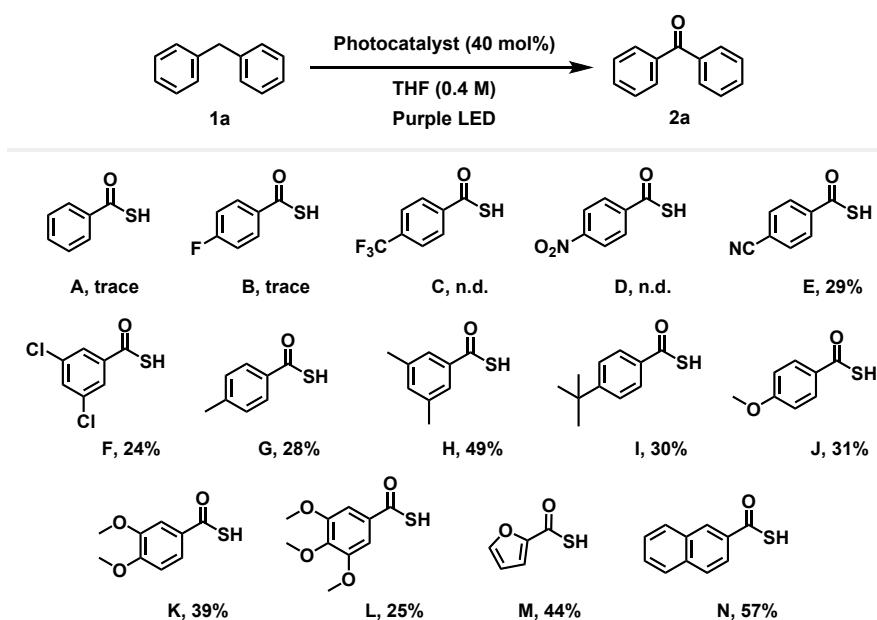

<sup>a</sup>Reaction conditions: diphenylmethane **1a** (0.2 mmol, 33.4  $\mu$ L), photocatalysts (40 mol%), THF (0.4 M), air, r.t., 30 W purple LED, 20 h. <sup>b</sup>Isolated yields.

Table S2. Screening of diphenylmethane photocatalytic oxidative coupling conditions

| Entry | Naphthalene-2-carboxaldehyde | Solvent            | Yield (%) <sup>b</sup> |
|-------|------------------------------|--------------------|------------------------|
| 1     | N, 40 mol%                   | DMAc               | 41                     |
| 2     | N, 40 mol%                   | NMP                | 38                     |
| 3     | N, 40 mol%                   | CH <sub>3</sub> CN | 46                     |
| 4     | N, 40 mol%                   | 1,4-dioxane        | trace                  |

|    |            |              |       |
|----|------------|--------------|-------|
| 5  | N, 40 mol% | DCE          | trace |
| 6  | N, 40 mol% | EtOH         | 23    |
| 7  | N, 40 mol% | DMSO         | 70    |
| 8  | N, 30 mol% | DMSO         | 56    |
| 9  | N, 50 mol% | DMSO         | 65    |
| 10 | N, 40 mol% | DMSO (0.2 M) | 64    |

<sup>a</sup>Reaction conditions: diphenylmethane **1a** (0.2 mmol, 33.4  $\mu$ L), naphthalene-2-carbothioic-*S*-acid **N** (X mol%), solvent (0.4 M), 30 W purple LED, 20 h. <sup>b</sup>Isolated yields.

Table S3. Screening of benzylalcohol photocatalytic oxidative coupling conditions—Evaluation of thioacids photocatalysts

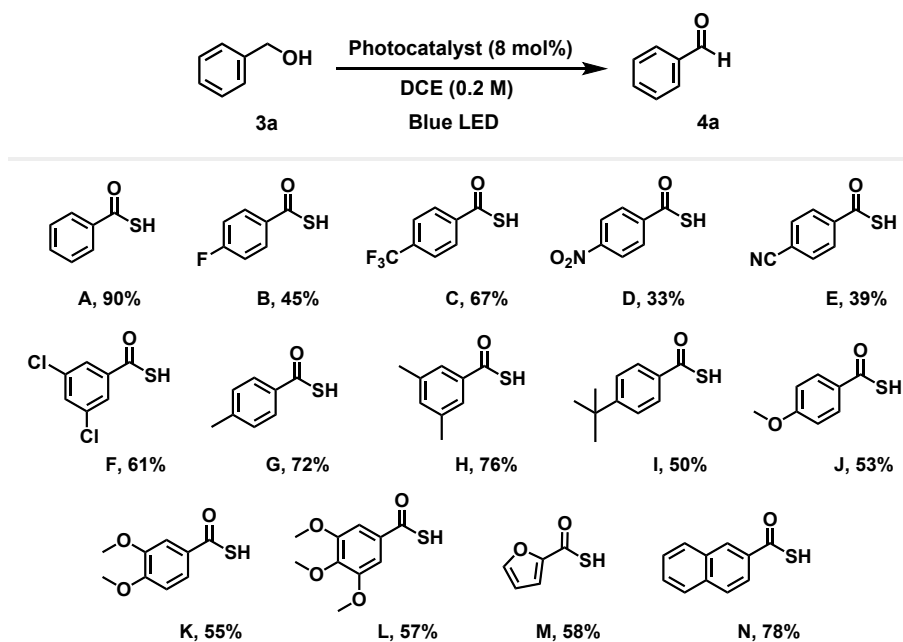

<sup>a</sup>Reaction conditions: benzylalcohol **3a** (0.2 mmol, 21  $\mu$ L), photocatalysts (8 mol%), DCE (0.2 M), air, r.t., 30 W blue LED, 8 h. <sup>b</sup>Isolated yields.

Table S4. Screening of benzylalcohol photocatalytic oxidative coupling conditions

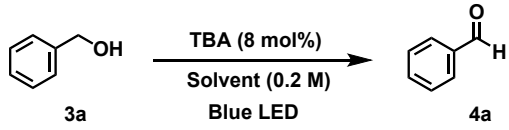

| Entry | Solvent            | Yield (%) <sup>b</sup> |
|-------|--------------------|------------------------|
| 1     | CH <sub>3</sub> CN | 80                     |
| 2     | THF                | trace                  |
| 3     | MeOH               | 22                     |
| 4     | Acetone            | 45                     |
| 5     | H <sub>2</sub> O   | n.d.                   |
| 6     | 1,4-dioxane        | 34                     |
| 7     | DCE                | 90                     |

<sup>a</sup>Reaction conditions: benzylalcohol **3a** (0.2 mmol, 21  $\mu$ L), TBA (8 mol%, 1.9  $\mu$ L), solvent (0.2 M), air, 30 W blue LED, 8 h. <sup>b</sup>Isolated yields. n.d. = not detected.

Table S5. Screening of diphenylmethanol photocatalytic oxidative coupling conditions

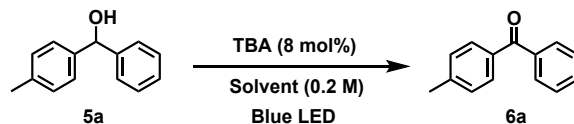

| Entry | Solvent            | Yield (%) <sup>b</sup> |
|-------|--------------------|------------------------|
| 1     | CH <sub>3</sub> CN | 45                     |
| 2     | THF                | 22                     |
| 3     | MeOH               | trace                  |
| 4     | Acetone            | 41                     |
| 5     | 1,4-dioxane        | 84                     |
| 6     | DCE                | 39                     |
| 7     | DMF                | trace                  |
| 8     | DMSO               | trace                  |
| 9     | EA                 | 26                     |

<sup>a</sup>Reaction conditions: phenyl(*p*-tolyl)methanol **5a** (0.2 mmol, 39.6 mg), TBA (8 mol%, 1.9  $\mu$ L), solvent (0.2 M), air, 30 W blue LED, 8 h. <sup>b</sup>Isolated yields.

Table S6. Screening of benzylamine photocatalytic oxidative coupling conditions—Evaluation of thioacids photocatalysts

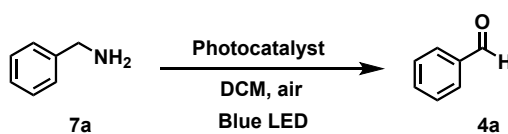

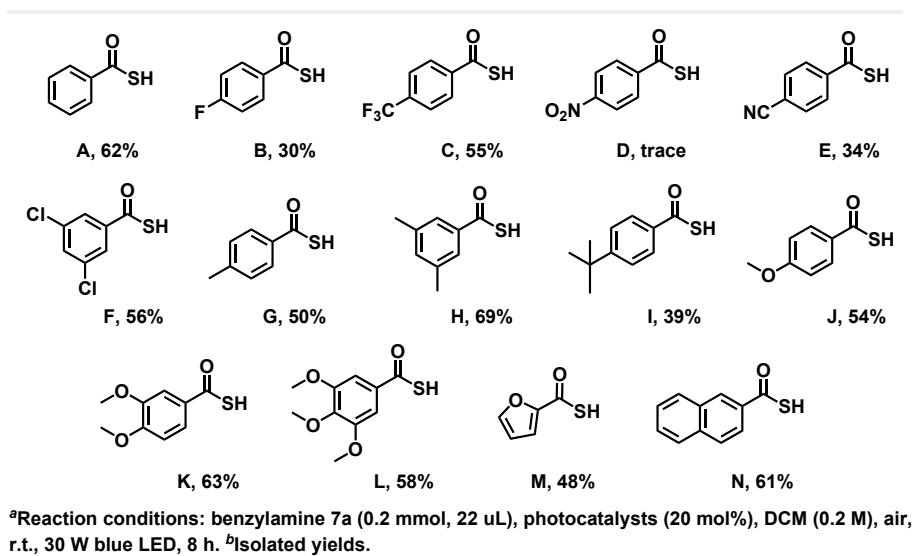

Table S7. Screening of benzylamine photocatalytic oxidative coupling conditions

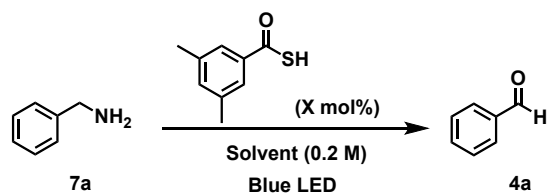

| Entry           | 3,5-dimethylbenzothioic <i>S</i> -acid | Solvent            | Yield (%) <sup>b</sup> |
|-----------------|----------------------------------------|--------------------|------------------------|
| 1               | <b>H</b> , 20 mol%                     | CH <sub>3</sub> CN | 45                     |
| 2               | <b>H</b> , 20 mol%                     | CHCl <sub>3</sub>  | 56                     |
| 3               | <b>H</b> , 20 mol%                     | 1,4-Dioxane        | 28                     |
| 4               | <b>H</b> , 20 mol%                     | MeOH               | trace                  |
| 5               | <b>H</b> , 20 mol%                     | THF                | 68                     |
| 6               | <b>H</b> , 20 mol%                     | Acetone            | trace                  |
| 7               | <b>H</b> , 20 mol%                     | DCE                | 42                     |
| 8               | <b>H</b> , 20 mol%                     | DMSO               | 23                     |
| 9               | <b>H</b> , 20 mol%                     | DMF                | 25                     |
| 10              | <b>H</b> , 20 mol%                     | H <sub>2</sub> O   | NR                     |
| 11              | <b>H</b> , 10 mol%                     | DCM                | 57                     |
| 12              | <b>H</b> , 30 mol%                     | DCM                | 66                     |
| 13 <sup>c</sup> | <b>H</b> , 20 mol%                     | DCM                | 85                     |

<sup>a</sup>Reaction conditions: benzylamine **7a** (0.2 mmol, 22  $\mu$ L), 3,5-dimethylbenzothioic *S*-acid (X mol%), solvent (0.2 M), 30 W blue LED, 8 h. <sup>b</sup>Isolated yields. <sup>c</sup>O<sub>2</sub>.

## 4. Experimental Procedures

### 4.1 General Procedures A for the Oxidation of the Benzylic sp<sup>3</sup> C-H Bonds using Purple LED

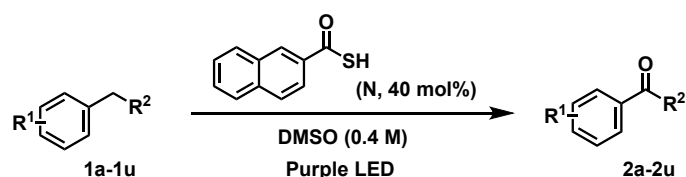

An oven-dried 25 mL Quartz tubes equipped with magnetic stirring bar were charged with naphthalene-2-carbothioic S-acid **N** (40 mol%, 15 mg) and the benzylic sp<sup>3</sup> C-H bonds **1a-1v** (0.2 mmol) in DMSO (0.4 M) with an ambient air at room temperature. The resulting mixture was stirred for 20–36 h under 30 W purple LED irradiation (the progress can be monitored *via* TLC). After cooling to room temperature, the mixture was diluted with dichloromethane, the volatiles were removed under vacuum and the residue was purified by preparative thin layer chromatography (petroleum ether/ethyl acetate 20:1-5:1) to give pure product **2a-2v**.

### 4.2 General Procedures B for the Oxidation of Primary and Secondary Benzylic Alcohols using Blue LED

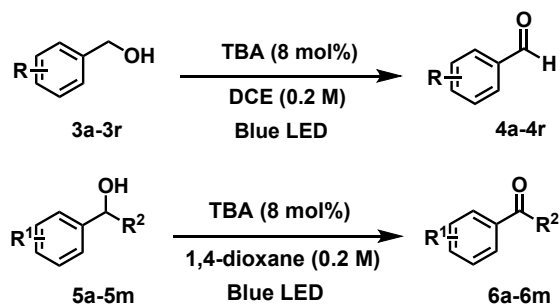

An oven-dried 25 mL Quartz tubes equipped with magnetic stirring bar were charged with thiobenzoic acid **A** (8 mol%, 1.9  $\mu$ L), primary benzylic alcohols **3a-3r** (0.2 mmol) or secondary benzylic alcohols **5a-5m** (0.2 mmol) in DCE (0.2 M) or 1,4-dioxane (0.2 M) with an ambient air at room temperature. The resulting mixture was stirred for 8–24 h under 30 W blue LED irradiation (the progress can be monitored *via* TLC). After cooling to room temperature, the mixture was diluted with dichloromethane, the volatiles were removed under vacuum and the residue was purified by preparative thin layer chromatography (petroleum ether/ethyl acetate 50:1-20:1) to give pure product **4a-4r** and **6a-6m**.

### 4.3 General Procedures C for the Oxidation of Substituted Benzylamines using Blue LED

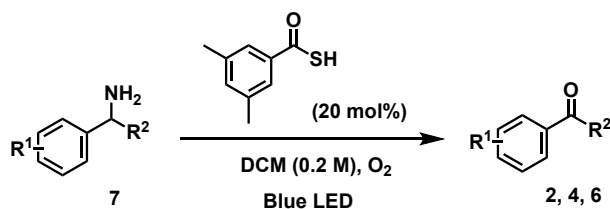

An oven-dried 25 mL Quartz tubes equipped with magnetic stirring bar were charged with 3,5-dimethylbenzothioic *S*-acid **H** (20 mol%, 6.6 mg), substituted benzylamines **7** (0.2 mmol) in DCM (0.2 M) with an O<sub>2</sub> atmosphere at room temperature. The resulting mixture was stirred for 8–24 h under 30 W blue LED irradiation (the progress can be monitored *via* TLC). After cooling to room temperature, the mixture was diluted with dichloromethane, the volatiles were removed under vacuum and the residue was purified by preparative thin layer chromatography (petroleum ether/ethyl acetate 50:1-20:1) to give pure product **2, 4, 6**.

#### 4.4 Scale-up Experiments

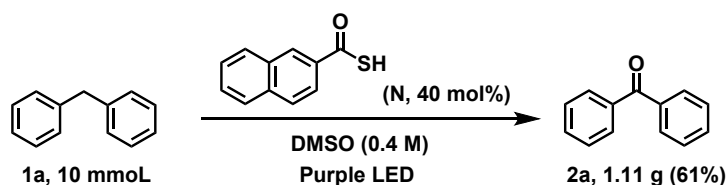

An oven-dried 25 mL Quartz tubes equipped with magnetic stirring bar were charged with naphthalene-2-carbithioic *S*-acid **N** (40 mol%, 752.1 mg), diphenylmethane **1a** (10 mmol, 1.67 mL) in DMSO (0.4 M) with an ambient air at room temperature. The resulting mixture was stirred for 72 h under 30 W purple LED irradiation (the progress can be monitored *via* TLC). After cooling to room temperature, the mixture was diluted with dichloromethane, the volatiles were removed under vacuum and the residue was purified by preparative thin layer chromatography (petroleum ether/ethyl acetate 20:1) to give pure product **2a** (1.11 g, 62%).

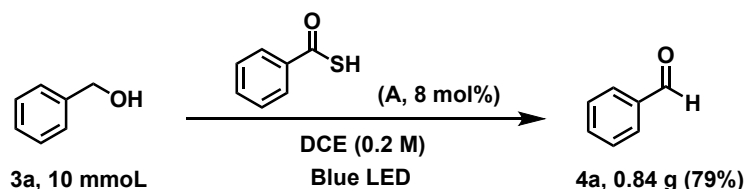

An oven-dried 25 mL Quartz tubes equipped with magnetic stirring bar were charged with thiobenzoic acid **A** (8 mol%, 94.2 μL), benzylalcohol **3a** (10 mmol, 1.04 mL) in DCE (0.2 M) with an ambient air at room temperature. The resulting mixture was stirred for 24 h under 30 W blue LED irradiation (the progress can be monitored *via* TLC).

After cooling to room temperature, the mixture was diluted with dichloromethane, the volatiles were removed under vacuum and the residue was purified by preparative thin layer chromatography (petroleum ether/ethyl acetate 50:1) to give pure product **4a** (0.84 g, 79%).

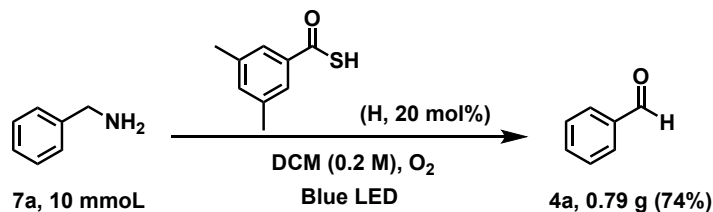

An oven-dried 25 mL Quartz tubes equipped with magnetic stirring bar were charged with 3,5-dimethylbenzothioic *S*-acid **H** (20 mol%, 332.1 mg), benzylamine **7a** (10 mmol, 1.04 mL) in DCM (0.2 M) with an O<sub>2</sub> atmosphere at room temperature. The resulting mixture was stirred for 24 h under 30 W blue LED irradiation (the progress can be monitored *via* TLC). After cooling to room temperature, the mixture was diluted with dichloromethane, the volatiles were removed under vacuum and the residue was purified by preparative thin layer chromatography (petroleum ether/ethyl acetate 50:1) to give pure product **4a** (0.79 g, 74%).

## 5. Mechanism Research

### 5.1 Radical Trapped Experiments

A mixture of naphthalene-2-carbothioic *S*-acid **N** (40 mol%, 15 mg), diphenylmethane **1a** (0.2 mmol, 33.4 uL) in DMSO (0.4 M) and 2,2,6,6-tetramethylpiperidinoxy (Tempo, 0.4 mmol)/1,4-diazabicyclo[2.2.2]octane (DABCO, 0.4 mmol)/1,1-diphenyl-2-picrylhydrazyl (DPPH, 0.4 mmol) was added to a 25 mL Quartz tubes with an ambient air at room temperature, then the contents were stirred at 30 W purple LED irradiation for 20 h. The reaction mixture was cooled down to room temperature and isolated by preparative thin layer chromatography.

A mixture of thiobenzoic acid **A** (8 mol%, 1.9 uL), benzylalcohol **3a** (0.2 mmol, 21 uL) in DCE (0.2 M) and 2,2,6,6-tetramethylpiperidinoxy (Tempo, 0.4 mmol)/1,4-diazabicyclo[2.2.2]octane (DABCO, 0.4 mmol)/1,1-diphenyl-2-picrylhydrazyl (DPPH, 0.4 mmol) was added to a 25 mL Quartz tubes with an ambient air at room temperature, then the contents were stirred at 30 W blue LED irradiation for 8 h. The reaction mixture was cooled down to room temperature and isolated by preparative thin layer chromatography.

A mixture of 3,5-dimethylbenzothioic *S*-acid **H** (20 mol%, 6.6  $\mu$ L), benzylamine **7a** (0.2 mmol, 22  $\mu$ L) in DCM (0.2 M) and 2,2,6,6-tetramethylpiperidinoxy (Tempo, 0.4 mmol)/1,4-diazabicyclo[2.2.2]octane (DABCO, 0.4 mmol)/2,2-diphenyl-1-picrylhydrazyl (DPPH, 0.4 mmol) and benzoquinone (0.4 mmol) was added to a 25 mL Quartz tubes with an O<sub>2</sub> atmosphere at room temperature, then the contents were stirred at 30 W blue LED irradiation for 8 h. The reaction mixture was cooled down to room temperature and isolated by preparative thin layer chromatography.

## 5.2 Electron Paramagnetic Resonance (EPR) study

An oven-dried 25 mL Quartz tubes equipped with magnetic stirring bar were charged with naphthalene-2-carbothioic *S*-acid **N** (40 mol%, 15 mg), 5,5-Dimethyl-1-pyrroline *N*-oxide (DMPO, 0.4 mmol, 41.1  $\mu$ L) and diphenylmethane **1a** (0.2 mmol, 33.4  $\mu$ L) in DMSO (0.4 M) with an ambient air at room temperature, the contents were stirred at 30 W purple LED irradiation for 2 h. Then, this reaction solution was taken out by capillary and was analyzed by EPR at room temperature (Fig. S2). A signal of the trapping radical was captured, the spectrum and hyperfine coupling constants of which are in good consistent with the literature values for the adduct of O<sub>2</sub><sup>•-</sup> with DMPO ( $g = 2.0000$ ,  $\alpha_N = 15.1$  G). These results illustrate that O<sub>2</sub><sup>•-</sup> generated from molecular oxygen is the active species in this photocatalytic reaction.

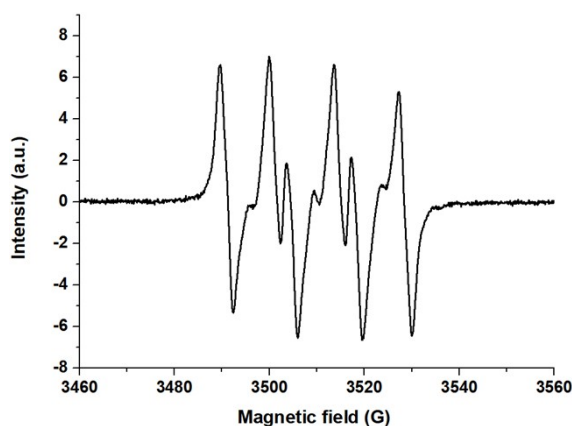

Fig. S2 EPR spectra of a solution of **N** (40 mol%), DMPO (0.4 mmol) and **1a** (0.2 mmol) in DMSO under purple LED irradiation for 2 h.

## 5.3 Emission Spectra of the Photocatalyst [A]<sup>•</sup>, [H]<sup>•</sup> and [N]<sup>•</sup>

Emission intensities were recorded using a Edinburgh FLS1000. A 0.01 M solution of A<sup>•</sup>Et<sub>3</sub>N, H<sup>•</sup>Et<sub>3</sub>N, N<sup>•</sup>Et<sub>3</sub>N (obtained by dissolving **A**, **H**, **N** and Et<sub>3</sub>N in a 1:1 ratio) in methanol were placed in a 10 mm light path quartz fluorescence cuvette.<sup>1</sup> The excitation

wavelength was fixed at 400 nm, 360 nm or 320 nm, while the emission light was acquired from 440 nm to 800 nm.

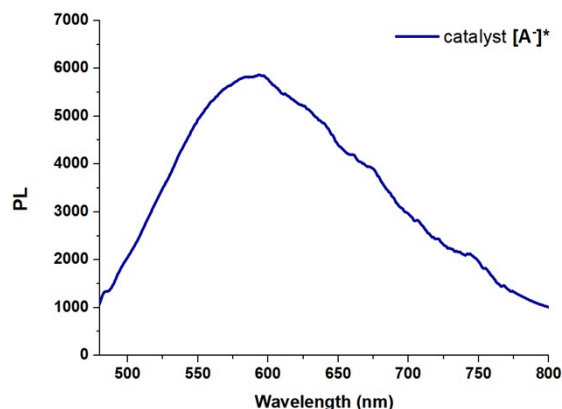

Fig. S3 Normalized emission of [A]\* upon 400 nm irradiation in MeOH.

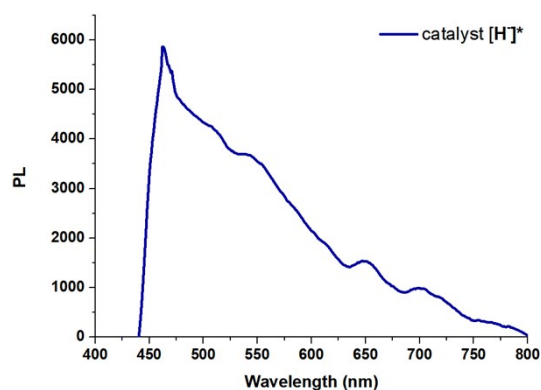

Fig. S4 Normalized emission of [H]\* upon 360 nm irradiation in MeOH.

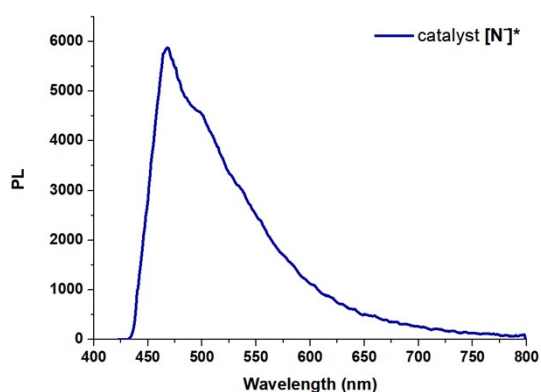

Fig. S5 Normalized emission of [N]\* upon 320 nm irradiation in MeOH.

#### 5.4 General Procedure for Cyclic Voltammetry (CV) Experiments

Cyclic voltammetry and square wave voltammetry were performed on an CHI660 electrochemical analyzer. The voltammetric cell consisted of a glassy carbon electrode, a platinum wire, and an Ag/AgCl reference electrode. Potentials are quoted with the following notation:  $E_p^C$  refers to the cathodic peak potential,  $E_p^A$  refers to the anodic

peak potential. Tetrabutylammonium hexafluorophosphate (TBAPF<sub>6</sub>) (0.1 M) was employed as the electrolyte, and CH<sub>3</sub>CN was employed as the solvent. The mixture was poured into the electrochemical cell in cyclic voltammetry experiments, and the scan rate was 0.10 V/s.

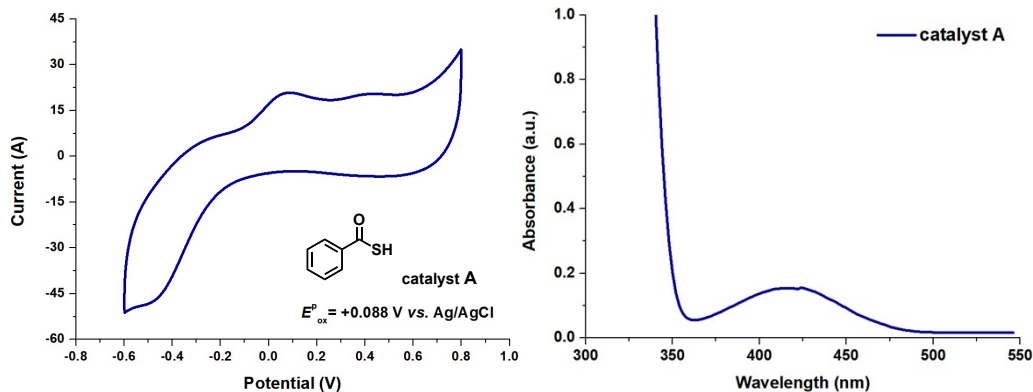

Fig. S6 Cyclic voltammogram of catalyst **A** (0.5 M) in CH<sub>3</sub>CN.  $E(\mathbf{A}^{\cdot}/[\mathbf{A}^{\cdot}]^*) = -2.86$  V vs SCE and optimal excitation wavelength.

The zero-zero vibrational state excitation energy  $E_{0,0}$  of catalyst **A** was estimated by the corresponding energy of the wavelength at optimal excitation wavelength (420 nm). Excited state oxidation and reduction potentials were calculated by the following approximating formulas<sup>1-3</sup>:

$$E(\mathbf{A}^{\cdot}/[\mathbf{A}^{\cdot}]^*) = E(\mathbf{A}^{\cdot}/\mathbf{A}^{\cdot}) - E_{0,0}([\mathbf{A}^{\cdot}]^*/\mathbf{A}^{\cdot}) \text{ [Eq. 1]}$$

The excited state oxidation potentials for catalyst **A** were thus calculated:

$$E_{0,0}([\mathbf{A}^{\cdot}]^*/\mathbf{A}^{\cdot}) = hc/\lambda = 6.626 \times 10^{-34} \times 3.0 \times 10^8 / 420 \times 10^{-9} \text{ J} = 4.733 \times 10^{-19} \text{ J}$$

$$E_{0,0}([\mathbf{A}^{\cdot}]^*/\mathbf{A}^{\cdot}) = 4.733 \times 10^{-19} \text{ J} / 1.602 \times 10^{-19} \text{ J} = 2.952 \text{ V}$$

$$E(\mathbf{A}^{\cdot}/[\mathbf{A}^{\cdot}]^*) = E(\mathbf{A}^{\cdot}/\mathbf{A}^{\cdot}) - E_{0,0}([\mathbf{A}^{\cdot}]^*/\mathbf{A}^{\cdot}) = 0.088 \text{ V} - 2.952 \text{ V}$$

$$E(\mathbf{A}^{\cdot}/[\mathbf{A}^{\cdot}]^*) = -2.86 \text{ V vs SCE}$$

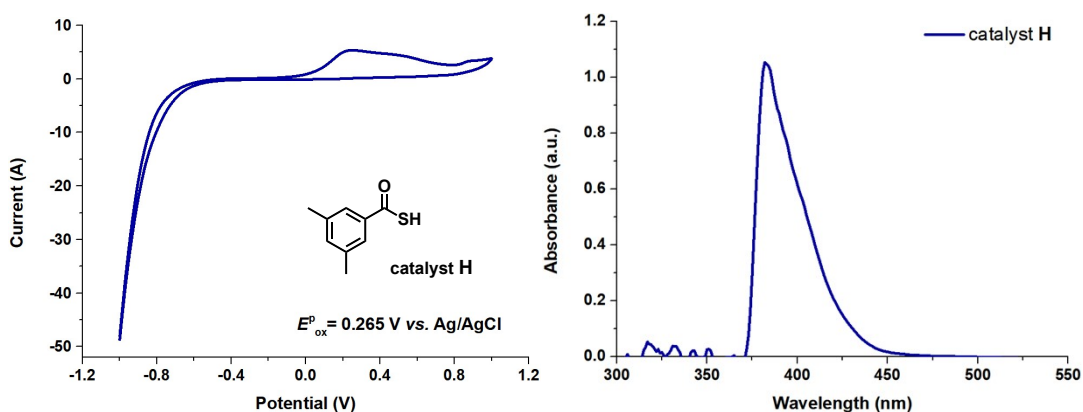

Fig. S7 Cyclic voltammogram of catalyst **H** (0.5 M) in CH<sub>3</sub>CN.  $E(\mathbf{H}^{\cdot}/[\mathbf{H}^{\cdot}]^*) = -2.98$  V vs SCE and optimal excitation wavelength.

The zero-zero vibrational state excitation energy  $E_{0,0}$  of catalyst **H** was estimated by the corresponding energy of the wavelength at optimal excitation wavelength (382 nm). Excited state oxidation and reduction potentials were calculated by the following approximating formulas<sup>1-3</sup>:

$$E(\mathbf{H}^{\cdot}/[\mathbf{H}^{\cdot}]^*) = E(\mathbf{H}^{\cdot}/\mathbf{H}^{\cdot}) - E_{0,0}([\mathbf{H}^{\cdot}]^*/\mathbf{H}^{\cdot}) \text{ [Eq. 1]}$$

The excited state oxidation potentials for catalyst **H** were thus calculated:

$$E_{0,0}([\mathbf{H}^{\cdot}]^*/\mathbf{H}^{\cdot}) = hc/\lambda = 6.626 \times 10^{-34} \times 3.0 \times 10^8 / 382 \times 10^{-9} \text{ J} = 5.204 \times 10^{-19} \text{ J}$$

$$E_{0,0}([\mathbf{H}^{\cdot}]^*/\mathbf{H}^{\cdot}) = 5.204 \times 10^{-19} \text{ J} / 1.602 \times 10^{-19} \text{ J} = 3.248 \text{ V}$$

$$E(\mathbf{H}^{\cdot}/[\mathbf{H}^{\cdot}]^*) = E(\mathbf{H}^{\cdot}/\mathbf{H}^{\cdot}) - E_{0,0}([\mathbf{H}^{\cdot}]^*/\mathbf{H}^{\cdot}) = 0.265 \text{ V} - 3.248 \text{ V}$$

$$E(\mathbf{H}^{\cdot}/[\mathbf{H}^{\cdot}]^*) = -2.98 \text{ V vs SCE}$$

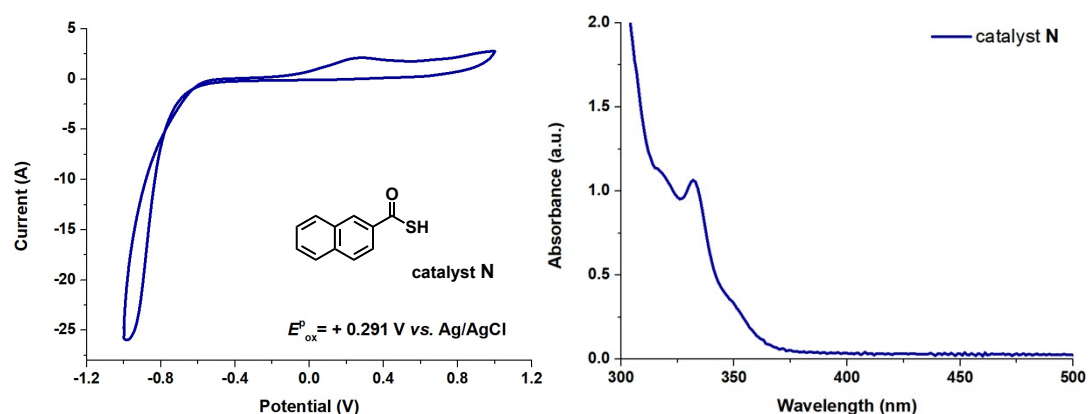

Fig. S8 Cyclic voltammogram of catalyst **N** (0.5 M) in CH<sub>3</sub>CN.  $E(\mathbf{N}^{\cdot}/[\mathbf{N}^{\cdot}]^*) = -3.45$  V vs SCE and optimal excitation wavelength.

The zero-zero vibrational state excitation energy  $E_{0,0}$  of catalyst **N** was estimated by the corresponding energy of the wavelength at optimal excitation wavelength (332 nm). Excited state oxidation and reduction potentials were calculated by the following approximating formulas<sup>1-3</sup>:

$$E(\text{N}^\cdot/[\text{N}^\cdot]^*) = E(\text{N}^\cdot/\text{N}^-) - E_{0,0}([\text{N}^\cdot]^*/\text{N}^-) \text{ [Eq. 1]}$$

The excited state oxidation potentials for catalyst **N** were thus calculated:

$$E_{0,0}([\text{N}^\cdot]^*/\text{N}^-) = hc/\lambda = 6.626 \times 10^{-34} \times 3.0 \times 10^8 / 332 \times 10^{-9} \text{ J} = 5.987 \times 10^{-19} \text{ J}$$

$$E_{0,0}([\text{N}^\cdot]^*/\text{N}^-) = 5.987 \times 10^{-19} \text{ J} / 1.602 \times 10^{-19} \text{ J} = 3.737 \text{ V}$$

$$E(\text{N}^\cdot/[\text{N}^\cdot]^*) = E(\text{N}^\cdot/\text{N}^-) - E_{0,0}([\text{N}^\cdot]^*/\text{N}^-) = 0.291 \text{ V} - 3.737 \text{ V}$$

$$E(\text{N}^\cdot/[\text{N}^\cdot]^*) = -3.45 \text{ V vs SCE}$$

## 6. Characterization Data of Products

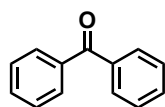

**Benzophenone (2a)**<sup>4</sup> was prepared following the General Procedure **A**. The crude product was purified by flash chromatography on silica gel (PE/EA = 20:1) to give the product **2a** (25.4 mg, 70% yield) as a colorless oil. <sup>1</sup>H NMR (400 MHz, CDCl<sub>3</sub>)  $\delta$  7.84 – 7.78 (m, 4H), 7.59 (t,  $J$  = 7.4 Hz, 2H), 7.49 (t,  $J$  = 7.6 Hz, 4H). <sup>13</sup>C{<sup>1</sup>H} NMR (101 MHz, CDCl<sub>3</sub>)  $\delta$  196.9, 137.7, 132.5, 130.2, 128.4.

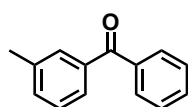

**Phenyl(*m*-tolyl)methanone (2b)**<sup>4</sup> was prepared following the General Procedure **A**. The crude product was purified by flash chromatography on silica gel (PE/EA = 20:1) to give the product **2b** (29.1 mg, 74% yield) as a colorless oil. <sup>1</sup>H NMR (400 MHz, CDCl<sub>3</sub>)  $\delta$  7.80 – 7.78 (m, 2H), 7.65 – 7.63 (m, 1H), 7.61 – 7.55 (m, 2H), 7.50 – 7.45 (m, 2H), 7.44 – 7.32 (m, 2H), 2.42 (s, 3H). <sup>13</sup>C{<sup>1</sup>H} NMR (101 MHz, CDCl<sub>3</sub>)  $\delta$  196.8, 138.1, 137.7, 137.6, 133.2, 132.3, 130.4, 130.0, 128.2, 128.1, 127.3, 21.3.

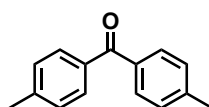

**Di-*p*-tolylmethanone (2c)**<sup>5</sup> was prepared following the General Procedure A. The crude product was purified by flash chromatography on silica gel (PE/EA = 20:1) to give the product **2c** (34.8 mg, 83% yield) as a white solid. Mp: 82 – 83 °C. <sup>1</sup>H NMR (400 MHz, CDCl<sub>3</sub>) δ 7.65 – 7.60 (m, 4H), 7.19 (dd, *J* = 8.4, 0.5 Hz, 4H), 2.36 (s, 6H). <sup>13</sup>C{<sup>1</sup>H} NMR (101 MHz, CDCl<sub>3</sub>) δ 196.3, 143.0, 135.3, 130.3, 129.0, 21.7.

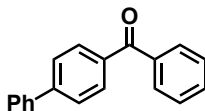

**[1,1'-Biphenyl]-4-yl(phenyl)methanone (2d)**<sup>5</sup> was prepared following the General Procedure A. The crude product was purified by flash chromatography on silica gel (PE/EA = 20:1) to give the product **2d** (38.7 mg, 75% yield) as a colorless oil. <sup>1</sup>H NMR (400 MHz, CDCl<sub>3</sub>) δ 7.92 – 7.88 (m, 2H), 7.87 – 7.83 (m, 2H), 7.73 – 7.70 (m, 2H), 7.67 – 7.58 (m, 3H), 7.53 – 7.47 (m, 4H), 7.44 – 7.39 (m, 1H). <sup>13</sup>C{<sup>1</sup>H} NMR (101 MHz, CDCl<sub>3</sub>) δ 196.5, 145.4, 140.1, 137.9, 136.4, 132.5, 130.9, 130.1, 129.1, 128.4, 128.3, 127.4, 127.1.

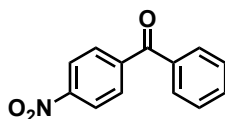

**(4-Nitrophenyl)(phenyl)methanone (2e)**<sup>6</sup> was prepared following the General Procedure A. The crude product was purified by flash chromatography on silica gel (PE/EA = 10:1) to give the product **2e** (25.0 mg, 55% yield) as a colorless oil. <sup>1</sup>H NMR (400 MHz, CDCl<sub>3</sub>) δ 8.37 – 8.32 (m, 2H), 7.96 – 7.92 (m, 2H), 7.82 – 7.78 (m, 2H), 7.68 – 7.63 (m, 1H), 7.56 – 7.50 (m, 2H). <sup>13</sup>C{<sup>1</sup>H} NMR (101 MHz, CDCl<sub>3</sub>) δ 194.9, 149.9, 143.0, 136.4, 133.6, 130.8, 130.2, 128.8, 123.7.

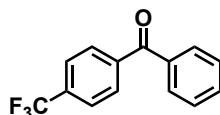

**Phenyl(4-(trifluoromethyl)phenyl)methanone (2f)**<sup>5</sup> was prepared following the General Procedure A. The crude product was purified by flash chromatography on silica gel (PE/EA = 10:1) to give the product **2f** (26.5 mg, 53% yield) as a white solid. Mp: 101 – 103 °C. <sup>1</sup>H NMR (400 MHz, CDCl<sub>3</sub>) δ 7.90 (d, *J* = 8.0 Hz, 2H), 7.83 – 7.79 (m, 2H), 7.76 (d, *J* = 8.1 Hz, 2H), 7.66 – 7.61 (m, 1H), 7.54 – 7.49 (m, 2H). <sup>13</sup>C{<sup>1</sup>H} NMR (101 MHz, CDCl<sub>3</sub>) δ 195.7, 140.9, 136.9, 133.9 (q, *J* = 32.3 Hz), 133.2, 130.3, 130.2,

128.7, 125.5 (q,  $J = 3.7$  Hz), 123.8 (q,  $J = 272.7$  Hz).  $^{19}\text{F}$  NMR (376 MHz,  $\text{CDCl}_3$ )  $\delta$  -62.99.

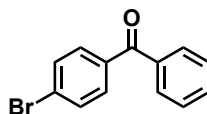

**(4-Bromophenyl)(phenyl)methanone (2g)**<sup>5</sup> was prepared following the General Procedure A. The crude product was purified by flash chromatography on silica gel (PE/EA = 20:1) to give the product **2g** (33.2 mg, 64% yield) as a white solid. Mp: 95 – 96 °C.  $^1\text{H}$  NMR (400 MHz,  $\text{CDCl}_3$ )  $\delta$  7.77 (dd,  $J = 5.2, 3.2$  Hz, 2H), 7.70 – 7.66 (m, 2H), 7.65 – 7.57 (m, 3H), 7.49 (dd,  $J = 10.5, 4.7$  Hz, 2H).  $^{13}\text{C}\{^1\text{H}\}$  NMR (101 MHz,  $\text{CDCl}_3$ )  $\delta$  195.6, 137.2, 136.3, 132.7, 131.6, 131.5, 129.9, 128.4, 127.5.

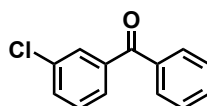

**(3-Chlorophenyl)(phenyl)methanone (2h)**<sup>5</sup> was prepared following the General Procedure A. The crude product was purified by flash chromatography on silica gel (PE/EA = 20:1) to give the product **2h** (26.4 mg, 61% yield) as a colorless oil.  $^1\text{H}$  NMR (400 MHz,  $\text{CDCl}_3$ )  $\delta$  7.83 – 7.76 (m, 3H), 7.69 – 7.65 (m, 1H), 7.66 – 7.59 (m, 1H), 7.58 – 7.54 (m, 1H), 7.53 – 7.48 (m, 2H), 7.43 (t,  $J = 7.8$  Hz, 1H).  $^{13}\text{C}\{^1\text{H}\}$  NMR (101 MHz,  $\text{CDCl}_3$ )  $\delta$  195.2, 139.2, 136.9, 134.5, 132.8, 132.3, 130.0, 129.9, 129.6, 128.4, 128.1.

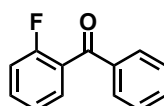

**(2-Fluorophenyl)(phenyl)methanone (2i)**<sup>5</sup> was prepared following the General Procedure A. The crude product was purified by flash chromatography on silica gel (PE/EA = 20:1) to give the product **2i** (22.7 mg, 57% yield) as a white solid. Mp: 63 – 65 °C.  $^1\text{H}$  NMR (400 MHz,  $\text{CDCl}_3$ )  $\delta$  7.87 – 7.80 (m, 2H), 7.61 – 7.49 (m, 3H), 7.49 – 7.44 (m, 2H), 7.29 – 7.21 (m, 1H), 7.19 – 7.12 (m, 1H).  $^{13}\text{C}\{^1\text{H}\}$  NMR (101 MHz,  $\text{CDCl}_3$ )  $\delta$  193.4, 160.0 (d,  $J = 252.5$  Hz), 137.4, 133.4, 133.0 (d,  $J = 8.2$  Hz), 130.7 (d,  $J = 2.8$  Hz), 129.8, 128.4, 127.0 (d,  $J = 14.7$  Hz), 124.2 (d,  $J = 3.6$  Hz), 116.2 (d,  $J = 21.6$  Hz).  $^{19}\text{F}$  NMR (376 MHz,  $\text{CDCl}_3$ )  $\delta$  -110.96 – -111.09 (m).

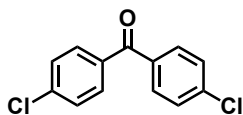

**Bis(4-chlorophenyl)methanone (2j)**<sup>5</sup> was prepared following the General Procedure A. The crude product was purified by flash chromatography on silica gel (PE/EA = 20:1) to give the product **2j** (29.6 mg, 59% yield) as a white solid. Mp: 110 – 112 °C. <sup>1</sup>H NMR (400 MHz, CDCl<sub>3</sub>) δ 7.75 – 7.71 (m, 4H), 7.49 – 7.45 (m, 4H). <sup>13</sup>C{<sup>1</sup>H} NMR (101 MHz, CDCl<sub>3</sub>) δ 194.3, 139.2, 135.6, 131.4, 128.9.

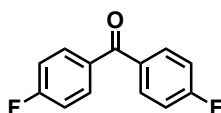

**Bis(4-fluorophenyl)methanone (2k)**<sup>7</sup> was prepared following the General Procedure A. The crude product was purified by flash chromatography on silica gel (PE/EA = 20:1) to give the product **2k** (26.2 mg, 60% yield) as a white solid. Mp: 104 – 105 °C. <sup>1</sup>H NMR (400 MHz, CDCl<sub>3</sub>) δ 7.84 – 7.77 (m, 4H), 7.19 – 7.12 (m, 4H). <sup>13</sup>C{<sup>1</sup>H} NMR (101 MHz, CDCl<sub>3</sub>) δ 193.9, 165.5 (d, *J* = 254.3 Hz), 133.8 (d, *J* = 3.1 Hz), 132.6 (d, *J* = 9.2 Hz), 115.7 (d, *J* = 21.9 Hz). <sup>19</sup>F NMR (376 MHz, CDCl<sub>3</sub>) δ -105.71.

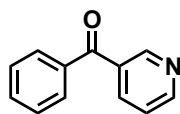

**Phenyl(pyridin-3-yl)methanone (2l)**<sup>7</sup> was prepared following the General Procedure A. The crude product was purified by flash chromatography on silica gel (PE/EA = 10:1) to give the product **2l** (15.1 mg, 41% yield) as a colorless oil. <sup>1</sup>H NMR (400 MHz, CDCl<sub>3</sub>) δ 8.99 (dd, *J* = 2.1, 0.7 Hz, 1H), 8.81 (dd, *J* = 4.9, 1.7 Hz, 1H), 7.86 – 7.77 (m, 1H), 7.56 – 7.47 (m, 2H), 7.65 – 7.61 (m, 1H), 7.53 – 7.48 (m, 2H), 7.47 – 7.42 (m, 1H). <sup>13</sup>C{<sup>1</sup>H} NMR (101 MHz, CDCl<sub>3</sub>) δ 194.6, 152.7, 150.7, 137.0, 136.5, 133.0, 129.8, 128.5, 123.2.

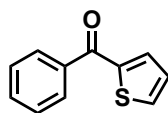

**Phenyl(thiophen-2-yl)methanone (2m)**<sup>5</sup> was prepared following the General Procedure A. The crude product was purified by flash chromatography on silica gel (PE/EA = 10:1) to give the product **2m** (15.0 mg, 40% yield) as a colorless oil. <sup>1</sup>H NMR (400 MHz, CDCl<sub>3</sub>) δ 7.90 – 7.83 (m, 2H), 7.72 (dd, *J* = 5.0, 1.1 Hz, 1H), 7.65 (dd, *J* = 3.8, 1.1 Hz, 1H), 7.62 – 7.57 (m, 1H), 7.55 – 7.45 (m, 2H), 7.16 (dd, *J* = 5.0, 3.8 Hz,

1H).  $^{13}\text{C}\{^1\text{H}\}$  NMR (101 MHz,  $\text{CDCl}_3$ )  $\delta$  188.3, 143.7, 138.2, 135.0, 134.3, 132.4, 129.3, 128.5, 128.1.

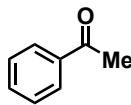

**Acetophenone (2n, 6j)**<sup>5</sup> was prepared following the General Procedure A/B. The crude product was purified by flash chromatography on silica gel (PE/EA = 20:1) to give the product **2n** (17.1 mg, 71% yield)/**6j** (18.8 mg, 78% yield) as a colorless oil.  $^1\text{H}$  NMR (400 MHz,  $\text{CDCl}_3$ )  $\delta$  7.99 – 7.93 (m, 2H), 7.59 – 7.53 (m, 1H), 7.49 – 7.43 (m, 2H), 2.61 (s, 3H).  $^{13}\text{C}\{^1\text{H}\}$  NMR (101 MHz,  $\text{CDCl}_3$ )  $\delta$  198.3, 137.3, 133.2, 128.7, 128.4, 26.7.

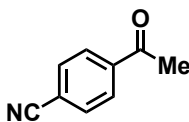

**4-Acetylbenzotrile (2o)**<sup>7</sup> was prepared following the General Procedure A. The crude product was purified by flash chromatography on silica gel (PE/EA = 20:1) to give the product **2n** (18.2 mg, 63% yield) as a colorless oil.  $^1\text{H}$  NMR (400 MHz,  $\text{CDCl}_3$ )  $\delta$  8.02 (dd,  $J$  = 5.0, 3.6 Hz, 2H), 7.78 – 7.74 (m, 2H), 2.63 (s, 3H).  $^{13}\text{C}\{^1\text{H}\}$  NMR (101 MHz,  $\text{CDCl}_3$ )  $\delta$  196.6, 140.0, 132.6, 128.8, 118.0, 116.5, 26.9.

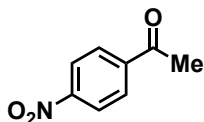

**1-(4-Nitrophenyl)ethan-1-one (2p)**<sup>7</sup> was prepared following the General Procedure A. The crude product was purified by flash chromatography on silica gel (PE/EA = 20:1) to give the product **2o** (17.8 mg, 54% yield) as a white solid. Mp: 134 – 136 °C.  $^1\text{H}$  NMR (400 MHz,  $\text{CDCl}_3$ )  $\delta$  8.33 – 8.28 (m, 2H), 8.13 – 8.08 (m, 2H), 2.68 – 2.66 (m, 3H).  $^{13}\text{C}\{^1\text{H}\}$  NMR (101 MHz,  $\text{CDCl}_3$ )  $\delta$  196.4, 150.5, 141.5, 129.4, 124.0, 27.1.

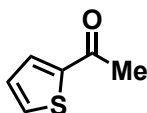

**1-(Thiophen-2-yl)ethan-1-one (2q)**<sup>8</sup> was prepared following the General Procedure A. The crude product was purified by flash chromatography on silica gel (PE/EA = 10:1) to give the product **2p** (13.1 mg, 52% yield) as a colorless oil.  $^1\text{H}$  NMR (400 MHz,

CDCl<sub>3</sub>)  $\delta$  7.67 – 7.61 (m, 1H), 7.60 – 7.54 (m, 1H), 7.10 – 7.02 (m, 1H), 2.52 – 2.46 (m, 3H). <sup>13</sup>C{<sup>1</sup>H} NMR (101 MHz, CDCl<sub>3</sub>)  $\delta$  190.7, 144.5, 133.8, 132.5, 128.1, 26.8.

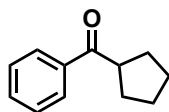

**Cyclopentyl(phenyl)methanone (2r)**<sup>9</sup> was prepared following the General Procedure A. The crude product was purified by flash chromatography on silica gel (PE/EA = 10:1) to give the product **2q** (16.6 mg, 48% yield) as a colorless oil. <sup>1</sup>H NMR (400 MHz, CDCl<sub>3</sub>)  $\delta$  7.96 – 7.89 (m, 2H), 7.50 – 7.42 (m, 1H), 7.41 – 7.34 (m, 2H), 3.70 – 3.59 (m, 1H), 1.90 – 1.81 (m, 4H), 1.71 – 1.55 (m, 4H). <sup>13</sup>C{<sup>1</sup>H} NMR (101 MHz, CDCl<sub>3</sub>)  $\delta$  202.5, 136.8, 132.5, 128.4, 128.3, 46.2, 29.8, 26.2.

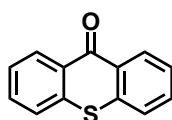

**9H-thioxanthen-9-one (2s)**<sup>8</sup> was prepared following the General Procedure A. The crude product was purified by flash chromatography on silica gel (PE/EA = 20:1) to give the product **2r** (20.9 mg, 60% yield) as a colorless oil. <sup>1</sup>H NMR (400 MHz, CDCl<sub>3</sub>)  $\delta$  8.62 (d,  $J$  = 8.0 Hz, 2H), 7.65 – 7.55 (m, 4H), 7.48 (t,  $J$  = 7.3 Hz, 2H). <sup>13</sup>C{<sup>1</sup>H} NMR (101 MHz, CDCl<sub>3</sub>)  $\delta$  180.1, 137.4, 132.4, 130.0, 129.4, 126.4, 126.1.

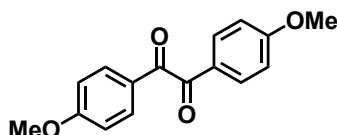

**1,2-Bis(4-methoxyphenyl)ethane-1,2-dione (2t)**<sup>10</sup> was prepared following the General Procedure A. The crude product was purified by flash chromatography on silica gel (PE/EA = 5:1) to give the product **2s** (37.2 mg, 69% yield) as a yellow solid. Mp: 132 – 133 °C. <sup>1</sup>H NMR (400 MHz, CDCl<sub>3</sub>)  $\delta$  7.97 – 7.91 (m, 4H), 6.95 (t,  $J$  = 5.8 Hz, 4H), 3.87 (s, 6H). <sup>13</sup>C{<sup>1</sup>H} NMR (101 MHz, CDCl<sub>3</sub>)  $\delta$  193.6, 165.0, 132.5, 126.4, 114.4, 55.8.

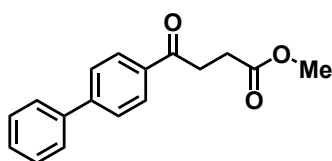

**Methyl 4-([1,1'-biphenyl]-4-yl)-4-oxobutanoate (2u)**<sup>11</sup> was prepared following the General Procedure A. The crude product was purified by flash chromatography on silica

gel (PE/EA = 5:1) to give the product **2t** (20.0 mg, 37% yield) as a white solid. Mp: 103 – 104 °C. <sup>1</sup>H NMR (400 MHz, CDCl<sub>3</sub>) δ 8.08 – 8.04 (m, 2H), 7.72 – 7.67 (m, 2H), 7.63 (dd, *J* = 5.2, 3.3 Hz, 2H), 7.50 – 7.44 (m, 2H), 7.41 (dt, *J* = 9.5, 4.2 Hz, 1H), 3.72 (s, 3H), 3.35 (t, *J* = 6.6 Hz, 2H), 2.79 (t, *J* = 6.6 Hz, 2H). <sup>13</sup>C{<sup>1</sup>H} NMR (101 MHz, CDCl<sub>3</sub>) δ 197.7, 173.5, 145.9, 139.9, 135.3, 129.0, 128.7, 128.3, 127.3, 77.4, 77.1, 76.8, 51.9, 33.5, 28.1.

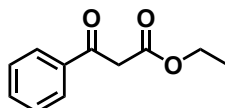

**Ethyl 3-oxo-3-phenylpropanoate (2v)**<sup>12</sup> was prepared following the General Procedure A. The crude product was purified by flash chromatography on silica gel (PE/EA = 20:1) to give the product **2u** (11.6 mg, 30% yield) as a colorless oil. <sup>1</sup>H NMR (400 MHz, CDCl<sub>3</sub>) δ 12.57 (s, enol), 7.96 – 7.92 (m, 2H), 7.79 – 7.75 (m, enol), 7.59 (t, *J* = 7.4 Hz, 1H), 7.47 (t, *J* = 7.6 Hz, 2H), 7.44 – 7.38 (m, enol), 5.66 (s, enol), 4.29 – 4.25 (m, enol), 4.21 (q, *J* = 7.2 Hz, 2H), 3.98 (s, 2H), 1.33 (t, *J* = 7.1 Hz, enol), 1.25 (t, *J* = 7.1 Hz, 3H). <sup>13</sup>C{<sup>1</sup>H} NMR (101 MHz, CDCl<sub>3</sub>) δ 192.6, 167.6, 136.2, 133.8, 131.3, 128.9, 128.7, 128.6, 126.2, 87.5, 61.6, 46.1, 14.2.

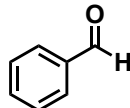

**Benzaldehyde (4a)** was prepared following the General Procedure B. The crude product was purified by flash chromatography on silica gel (PE/EA = 50:1) to give the product **4a** (18.3 mg, 90% yield) as a colorless oil. <sup>1</sup>H NMR (400 MHz, CDCl<sub>3</sub>) δ 10.01 (s, 1H), 7.90 – 7.84 (m, 2H), 7.65 – 7.58 (m, 1H), 7.54 – 7.48 (m, 2H). The experimental data are in agreement with the literature report.<sup>13</sup>

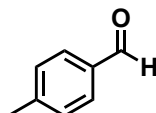

**4-Methylbenzaldehyde (4b)**<sup>13</sup> was prepared following the General Procedure B. The crude product was purified by flash chromatography on silica gel (PE/EA = 20:1) to give the product **4b** (19.9 mg, 83% yield) as a colorless oil. <sup>1</sup>H NMR (400 MHz, CDCl<sub>3</sub>) δ 9.93 (s, 1H), 7.74 (d, *J* = 8.0 Hz, 2H), 7.29 (d, *J* = 7.7 Hz, 2H), 2.40 (s, 3H). <sup>13</sup>C{<sup>1</sup>H} NMR (101 MHz, CDCl<sub>3</sub>) δ 192.2, 145.7, 134.3, 130.0, 129.9, 22.1.

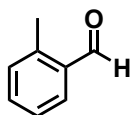

**Methylbenzaldehyde (4c)**<sup>13</sup> was prepared following the General Procedure **B**. The crude product was purified by flash chromatography on silica gel (PE/EA = 20:1) to give the product **4c** (15.8 mg, 66% yield) as a colorless oil. <sup>1</sup>H NMR (400 MHz, CDCl<sub>3</sub>) 10.20 – 10.15 (m, 1H), 7.74 – 7.69 (m, 1H), 7.43 – 7.37 (m, 1H), 7.28 (t, *J* = 7.3 Hz, 1H), 7.17 (d, *J* = 7.4 Hz, 1H), 2.60 (d, *J* = 4.7 Hz, 3H). <sup>13</sup>C{<sup>1</sup>H} NMR (101 MHz, CDCl<sub>3</sub>) δ 193.0, 140.8, 134.3, 133.8, 132.2, 131.9, 126.5, 19.8.

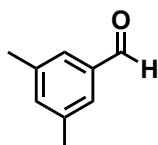

**3,5-Dimethylbenzaldehyde (4d)**<sup>13</sup> was prepared following the General Procedure **B**. The crude product was purified by flash chromatography on silica gel (PE/EA = 20:1) to give the product **4d** (22.8 mg, 85% yield) as a colorless oil. <sup>1</sup>H NMR (400 MHz, CDCl<sub>3</sub>) δ 9.94 (s, 1H), 7.48 (s, 2H), 7.26 (s, 1H), 2.39 (s, 6H). <sup>13</sup>C{<sup>1</sup>H} NMR (101 MHz, CDCl<sub>3</sub>) δ 193.0, 138.9, 136.7, 136.3, 127.7, 21.2.

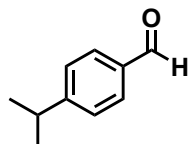

**Isopropylbenzaldehyde (4e)**<sup>14</sup> was prepared following the General Procedure **B**. The crude product was purified by flash chromatography on silica gel (PE/EA = 20:1) to give the product **4e** (23.8 mg, 80% yield) as a colorless oil. <sup>1</sup>H NMR (400 MHz, CDCl<sub>3</sub>) δ 9.95 (d, *J* = 1.8 Hz, 1H), 7.79 (dd, *J* = 8.0, 1.5 Hz, 2H), 7.39 – 7.33 (m, 2H), 2.99 – 2.93 (m, 1H), 1.27 – 1.24 (m, 6H). <sup>13</sup>C{<sup>1</sup>H} NMR (101 MHz, CDCl<sub>3</sub>) δ 192.2, 156.4, 134.6, 130.1, 127.3, 34.6, 23.8.

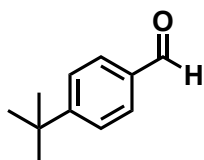

**(Tert-butyl)benzaldehyde (4f)**<sup>14</sup> was prepared following the General Procedure **B**. The crude product was purified by flash chromatography on silica gel (PE/EA = 20:1) to give the product **4f** (24.7 mg, 76% yield) as a colorless oil. <sup>1</sup>H NMR (400 MHz, CDCl<sub>3</sub>)

$\delta$  9.96 (s, 1H), 7.80 (d,  $J$  = 8.4 Hz, 2H), 7.53 (d,  $J$  = 8.3 Hz, 2H), 1.33 (d,  $J$  = 0.7 Hz, 9H).  $^{13}\text{C}\{^1\text{H}\}$  NMR (101 MHz,  $\text{CDCl}_3$ )  $\delta$  192.2, 158.6, 134.2, 129.8, 126.1, 35.5, 31.2.

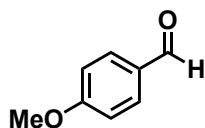

**4-Methoxybenzaldehyde (4g)**<sup>13</sup> was prepared following the General Procedure **B**. The crude product was purified by flash chromatography on silica gel (PE/EA = 10:1) to give the product **4g** (18.6 mg, 68% yield) as a colorless oil.  $^1\text{H}$  NMR (400 MHz,  $\text{CDCl}_3$ )  $\delta$  9.88 (s, 1H), 7.83 (d,  $J$  = 8.8 Hz, 2H), 7.00 (d,  $J$  = 8.7 Hz, 2H), 3.88 (s, 3H).  $^{13}\text{C}\{^1\text{H}\}$  NMR (101 MHz,  $\text{CDCl}_3$ )  $\delta$  190.9, 164.7, 132.1, 130.1, 114.4, 55.7.

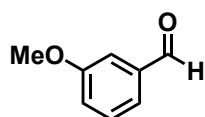

**3-Methoxybenzaldehyde (4h)**<sup>13</sup> was prepared following the General Procedure **B**. The crude product was purified by flash chromatography on silica gel (PE/EA = 10:1) to give the product **4h** (16.0 mg, 59% yield) as a yellow oil.  $^1\text{H}$  NMR (400 MHz,  $\text{CDCl}_3$ ) 9.92 – 9.79 (m, 1H), 7.41 – 7.24 (m, 3H), 7.13 – 7.01 (m, 1H), 3.80 – 3.67 (m, 3H).  $^{13}\text{C}\{^1\text{H}\}$  NMR (101 MHz,  $\text{CDCl}_3$ )  $\delta$  192.2, 160.3, 138.0, 130.2, 123.6, 121.6, 112.2, 55.6.

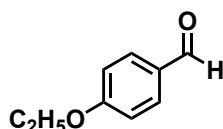

**4-Ethoxybenzaldehyde (4i)**<sup>15</sup> was prepared following the General Procedure **B**. The crude product was purified by flash chromatography on silica gel (PE/EA = 10:1) to give the product **4i** (18.6 mg, 63% yield) as a colorless oil.  $^1\text{H}$  NMR (400 MHz,  $\text{CDCl}_3$ )  $\delta$  9.88 (s, 1H), 7.87 – 7.79 (m, 2H), 7.02 – 6.95 (m, 2H), 4.12 (q,  $J$  = 7.0 Hz, 2H), 1.45 (dd,  $J$  = 8.3, 5.6 Hz, 3H).  $^{13}\text{C}\{^1\text{H}\}$  NMR (101 MHz,  $\text{CDCl}_3$ )  $\delta$  190.8, 164.1, 132.0, 129.7, 114.7, 63.9, 14.6.

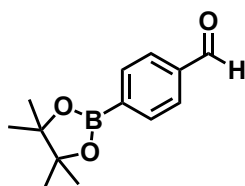

**4-(4,4,5,5-Tetramethyl-1,3,2-dioxaborolan-2-yl)benzaldehyde (4j)**<sup>16</sup> was prepared following the General Procedure **B**. The crude product was purified by flash

chromatography on silica gel (PE/EA = 20:1) to give the product **4j** (30.2 mg, 65% yield) as a colorless oil.  $^1\text{H}$  NMR (400 MHz,  $\text{CDCl}_3$ )  $\delta$  10.05 (s, 1H), 7.96 (d,  $J$  = 8.0 Hz, 2H), 7.88 – 7.85 (m, 2H), 1.36 (s, 12H).  $^{13}\text{C}\{^1\text{H}\}$  NMR (101 MHz,  $\text{CDCl}_3$ ) 192.8, 138.2, 135.3, 128.8, 84.5, 25.0.

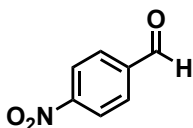

**4-Nitrobenzaldehyde (4k)**<sup>17</sup> was prepared following the General Procedure **B**. The crude product was purified by flash chromatography on silica gel (PE/EA = 10:1) to give the product **4k** (17.4 mg, 58% yield) as a colorless oil.  $^1\text{H}$  NMR (400 MHz,  $\text{CDCl}_3$ )  $\delta$  10.16 (s, 1H), 8.44 – 8.36 (m, 2H), 8.12 – 8.04 (m, 2H).  $^{13}\text{C}\{^1\text{H}\}$  NMR (101 MHz,  $\text{CDCl}_3$ )  $\delta$  190.4, 151.2, 140.1, 130.6, 124.4.

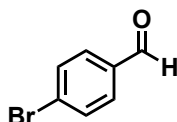

**4-Bromobenzaldehyde (4l)**<sup>17</sup> was prepared following the General Procedure **B**. The crude product was purified by flash chromatography on silica gel (PE/EA = 20:1) to give the product **4l** (22.3 mg, 61% yield) as a colorless oil.  $^1\text{H}$  NMR (400 MHz,  $\text{CDCl}_3$ )  $\delta$  9.98 (s, 1H), 7.79 – 7.73 (m, 2H), 7.73 – 7.66 (m, 2H).  $^{13}\text{C}\{^1\text{H}\}$  NMR (101 MHz,  $\text{CDCl}_3$ )  $\delta$  191.2, 135.2, 132.5, 131.1, 129.9.

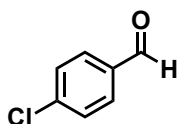

**4-Chlorobenzaldehyde (4m)**<sup>17</sup> was prepared following the General Procedure **B**. The crude product was purified by flash chromatography on silica gel (PE/EA = 20:1) to give the product **4m** (17.9 mg, 64% yield) as a colorless oil.  $^1\text{H}$  NMR (400 MHz,  $\text{CDCl}_3$ )  $\delta$  9.91 (d,  $J$  = 0.9 Hz, 1H), 7.88 – 7.82 (m, 2H), 7.19 – 7.10 (m, 2H).  $^{13}\text{C}\{^1\text{H}\}$  NMR (101 MHz,  $\text{CDCl}_3$ )  $\delta$  190.9, 141.0, 134.8, 131.0, 129.5.

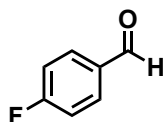

**4-Fluorobenzaldehyde (4n)**<sup>17</sup> was prepared following the General Procedure **B**. The crude product was purified by flash chromatography on silica gel (PE/EA = 20:1) to give the product **4n** (17.1 mg, 69% yield) as a colorless oil.  $^1\text{H}$  NMR (400 MHz,  $\text{CDCl}_3$ )

$\delta$  9.98 (s, 1H), 7.82 (d,  $J$  = 8.4 Hz, 2H), 7.51 (d,  $J$  = 8.3 Hz, 2H).  $^{13}\text{C}\{^1\text{H}\}$  NMR (101 MHz,  $\text{CDCl}_3$ )  $\delta$  190.6, 166.7 (d,  $J$  = 256.8 Hz), 133.0 (d,  $J$  = 9.5 Hz), 132.4 (d,  $J$  = 9.7 Hz), 116.49 (d,  $J$  = 22.3 Hz).  $^{19}\text{F}$  NMR (376 MHz,  $\text{CDCl}_3$ )  $\delta$  -102.40.

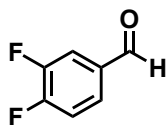

**3,4-Difluorobenzaldehyde (4o)**<sup>17</sup> was prepared following the General Procedure B. The crude product was purified by flash chromatography on silica gel (PE/EA = 20:1) to give the product **4o** (19.9 mg, 70% yield) as a colorless oil.  $^1\text{H}$  NMR (400 MHz,  $\text{CDCl}_3$ )  $\delta$  9.93 (d,  $J$  = 2.0 Hz, 1H), 7.76 – 7.65 (m, 2H), 7.39 – 7.31 (m, 1H).  $^{13}\text{C}\{^1\text{H}\}$  NMR (101 MHz,  $\text{CDCl}_3$ )  $\delta$  189.6, 155.9 (d,  $J$  = 13.1 Hz), 153.4 (d,  $J$  = 13.0 Hz), 152.4 (d,  $J$  = 13.3 Hz), 149.9 (d,  $J$  = 13.3 Hz), 133.7, 127.4 (dd,  $J$  = 7.7, 3.4 Hz), 118.3 (d,  $J$  = 18.3 Hz), 117.8 (d,  $J$  = 17.5 Hz).  $^{19}\text{F}$  NMR (376 MHz,  $\text{CDCl}_3$ )  $\delta$  -126.86 (d,  $J$  = 20.5 Hz), -135.22 (d,  $J$  = 20.5 Hz).

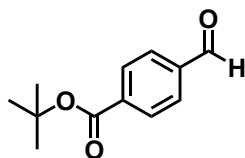

**Tert-butyl 4-formylbenzoate (4p)**<sup>18</sup> was prepared following the General Procedure B. The crude product was purified by flash chromatography on silica gel (PE/EA = 5:1) to give the product **4p** (29.6 mg, 72% yield) as a colorless oil.  $^1\text{H}$  NMR (400 MHz,  $\text{CDCl}_3$ )  $\delta$  10.09 (s, 1H), 8.14 (d,  $J$  = 8.2 Hz, 2H), 7.93 (d,  $J$  = 8.7 Hz, 2H), 1.61 (s, 9H).  $^{13}\text{C}\{^1\text{H}\}$  NMR (101 MHz,  $\text{CDCl}_3$ )  $\delta$  191.9, 164.8, 138.9, 137.2, 130.1, 129.5, 82.1.

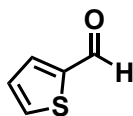

**Thiophene-2-carbaldehyde (4q)**<sup>17</sup> was prepared following the General Procedure B. The crude product was purified by flash chromatography on silica gel (PE/EA = 20:1) to give the product **4q** (13.9 mg, 62% yield) as a yellow oil.  $^1\text{H}$  NMR (400 MHz,  $\text{CDCl}_3$ )  $\delta$  9.94 (d,  $J$  = 1.2 Hz, 1H), 7.80 – 7.74 (m, 2H), 7.21 (dd,  $J$  = 4.8, 3.8 Hz, 1H).  $^{13}\text{C}\{^1\text{H}\}$  NMR (101 MHz,  $\text{CDCl}_3$ )  $\delta$  183.1, 144.1, 136.5, 135.3, 128.4.

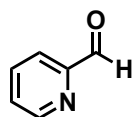

**Picolinaldehyde (4r)**<sup>17</sup> was prepared following the General Procedure B. The crude product was purified by flash chromatography on silica gel (PE/EA = 20:1) to give the product **4r** (12.4 mg, 58% yield) as a colorless oil. <sup>1</sup>H NMR (400 MHz, CDCl<sub>3</sub>) δ 9.87 – 9.70 (m, 1H), 8.56 – 8.50 (m, 1H), 7.73 – 7.60 (m, 2H), 7.33 – 7.25 (m, 1H). <sup>13</sup>C{<sup>1</sup>H} NMR (101 MHz, CDCl<sub>3</sub>) δ 193.6, 152.9, 150.3, 137.2, 128.0, 121.8.

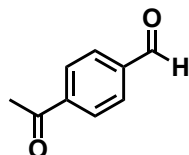

**4-Acetylbenzaldehyde (4s)**<sup>19</sup> was prepared following the General Procedure C. The crude product was purified by flash chromatography on silica gel (PE/EA = 5:1) to give the product **4s** (16.4 mg, 55% yield) as a colorless oil. <sup>1</sup>H NMR (400 MHz, CDCl<sub>3</sub>) δ 10.11 (s, 1H), 8.10 (d, *J* = 8.3 Hz, 2H), 7.98 (d, *J* = 8.3 Hz, 2H), 2.66 (s, 3H). <sup>13</sup>C{<sup>1</sup>H} NMR (101 MHz, CDCl<sub>3</sub>) δ 197.5, 191.8, 141.3, 139.2, 130.0, 129.0, 27.1.

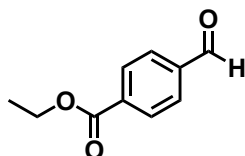

**Ethyl 4-formylbenzoate (4t)**<sup>18</sup> was prepared following the General Procedure C. The crude product was purified by flash chromatography on silica gel (PE/EA = 5:1) to give the product **4t** (20.4 mg, 57% yield) as a colorless oil. <sup>1</sup>H NMR (400 MHz, CDCl<sub>3</sub>) δ 10.10 (s, 1H), 8.22 – 8.16 (m, 2H), 8.16 – 8.13 (m, 1H), 7.97 – 7.93 (m, 1H), 4.45 – 4.39 (m, 2H), 1.42 (t, *J* = 7.1 Hz, 3H). <sup>13</sup>C{<sup>1</sup>H} NMR (101 MHz, CDCl<sub>3</sub>) δ 191.9, 165.7, 139.2, 135.6, 130.3, 129.6, 61.8, 14.4.

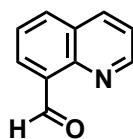

**Quinoline-8-carbaldehyde (4u)**<sup>20</sup> was prepared following the General Procedure C. The crude product was purified by flash chromatography on silica gel (PE/EA = 20:1) to give the product **4u** (19.6 mg, 62% yield) as a colorless oil. <sup>1</sup>H NMR (400 MHz, CDCl<sub>3</sub>) δ 11.47 (s, 1H), 9.07 (dd, *J* = 4.1, 1.6 Hz, 1H), 8.36 – 8.32 (m, 1H), 8.26 (dd, *J* = 8.3, 1.5 Hz, 1H), 8.11 (dd, *J* = 8.1, 1.3 Hz, 1H), 7.69 (t, *J* = 7.7 Hz, 1H), 7.53 (dd, *J* = 8.3, 4.2 Hz, 1H). <sup>13</sup>C{<sup>1</sup>H} NMR (101 MHz, CDCl<sub>3</sub>) δ 192.6, 151.4, 147.7, 136.4, 134.4, 131.8, 129.4, 128.4, 126.3, 121.9.

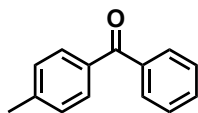

**Phenyl(*p*-tolyl)methanone (6a)**<sup>5</sup> was prepared following the General Procedure **B**. The crude product was purified by flash chromatography on silica gel (PE/EA = 20:1) to give the product **6a** (32.9 mg, 84% yield) as a colorless oil. <sup>1</sup>H NMR (400 MHz, CDCl<sub>3</sub>) δ 7.80 – 7.77 (m, 2H), 7.74 – 7.71 (m, 2H), 7.62 – 7.53 (m, 1H), 7.53– 7.43 (m, 2H), 7.30 – 7.27 (m, 2H), 2.44 (s, 3H). <sup>13</sup>C{<sup>1</sup>H} NMR (101 MHz, CDCl<sub>3</sub>) δ 196.6, 143.3, 138.0, 135.0, 132.2, 130.4, 130.0, 129.1, 128.3, 21.7.

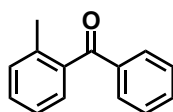

**Phenyl(*o*-tolyl)methanone (6b)**<sup>5</sup> was prepared following the General Procedure **B**. The crude product was purified by flash chromatography on silica gel (PE/EA = 20:1) to give the product **6b** (30.6 mg, 78% yield) as a colorless oil. <sup>1</sup>H NMR (400 MHz, CDCl<sub>3</sub>) δ 7.83 – 7.79 (m, 2H), 7.60 – 7.56 (m, 1H), 7.48 – 7.43 (m, 2H), 7.42 – 7.35 (m, 1H), 7.34 – 7.21 (m, 3H), 2.34 (s, 3H). <sup>13</sup>C{<sup>1</sup>H} NMR (101 MHz, CDCl<sub>3</sub>) δ 198.8, 138.7, 137.9, 136.9, 133.3, 131.1, 130.4, 130.2, 128.63, 128.58, 125.3, 20.1.

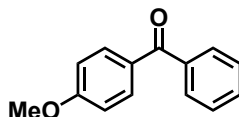

**(4-Methoxyphenyl)(phenyl)methanone (6c)**<sup>5</sup> was prepared following the General Procedure **B**. The crude product was purified by flash chromatography on silica gel (PE/EA = 10:1) to give the product **6c** (31.9 mg, 75% yield) as a colorless oil. <sup>1</sup>H NMR (400 MHz, CDCl<sub>3</sub>) δ 7.85 – 7.81 (m, 2H), 7.78 – 7.74 (m, 2H), 7.59 – 7.54 (m, 1H), 7.52 – 7.43 (m, 2H), 6.99 – 6.94 (m, 2H), 3.89 (s, 3H). <sup>13</sup>C{<sup>1</sup>H} NMR (101 MHz, CDCl<sub>3</sub>) δ 195.6, 163.3, 138.4, 132.7, 132.0, 130.2, 129.8, 128.3, 113.7, 55.6.

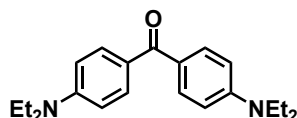

**Bis(4-(diethylamino)phenyl)methanone (6d)**<sup>21</sup> was prepared following the General Procedure **B**. The crude product was purified by flash chromatography on silica gel (PE/EA = 20:1) to give the product **6d** (45.4 mg, 70% yield) as a colorless oil. <sup>1</sup>H NMR (400 MHz, CDCl<sub>3</sub>) δ 7.79 – 7.72 (m, 2H), 6.65 (d, *J* = 8.9 Hz, 2H), 3.42 (q, *J* = 7.1 Hz,

4H), 1.24 – 1.18 (m, 6H).  $^{13}\text{C}\{^1\text{H}\}$  NMR (101 MHz,  $\text{CDCl}_3$ )  $\delta$  193.6, 150.4, 132.6, 125.7, 110.1, 44.6, 12.7.

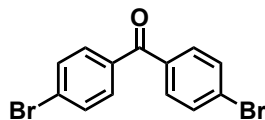

**Bis(4-bromophenyl)methanone (6e)**<sup>22</sup> was prepared following the General Procedure **B**. The crude product was purified by flash chromatography on silica gel (PE/EA = 20:1) to give the product **6e** (48.0 mg, 71% yield) as a colorless oil.  $^1\text{H}$  NMR (400 MHz,  $\text{CDCl}_3$ )  $\delta$  7.66 – 7.60 (m, 8H).  $^{13}\text{C}\{^1\text{H}\}$  NMR (101 MHz,  $\text{CDCl}_3$ )  $\delta$  194.6, 136.0, 131.9, 131.5, 127.9.

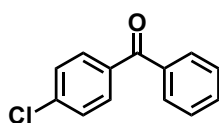

**(4-Chlorophenyl)(phenyl)methanone (6f)**<sup>5</sup> was prepared following the General Procedure **B**. The crude product was purified by flash chromatography on silica gel (PE/EA = 20:1) to give the product **6f** (47.0 mg, 74% yield) as a white solid. Mp: 70 – 72 °C.  $^1\text{H}$  NMR (400 MHz,  $\text{CDCl}_3$ )  $\delta$  7.79 – 7.72 (m, 4H), 7.63 – 7.58 (m, 1H), 7.52 – 7.44 (m, 4H).  $^{13}\text{C}\{^1\text{H}\}$  NMR (101 MHz,  $\text{CDCl}_3$ )  $\delta$  195.6, 139.0, 137.4, 136.0, 132.8, 131.6, 130.1, 128.8, 128.5.

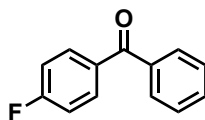

**(4-Fluorophenyl)(phenyl)methanone (6g)**<sup>5</sup> was prepared following the General Procedure **B**. The crude product was purified by flash chromatography on silica gel (PE/EA = 20:1) to give the product **6g** (30.5 mg, 76% yield) as a colorless oil.  $^1\text{H}$  NMR (400 MHz,  $\text{CDCl}_3$ )  $\delta$  7.88 – 7.82 (m, 2H), 7.80 – 7.75 (m, 2H), 7.62 – 7.57 (m, 1H), 7.51 – 7.46 (m, 2H), 7.19 – 7.13 (m, 2H).  $^{13}\text{C}\{^1\text{H}\}$  NMR (101 MHz,  $\text{CDCl}_3$ )  $\delta$  195.4, 165.5 (d,  $J=254.1$  Hz), 137.6, 133.9 (d,  $J=3.1$  Hz), 132.8 (d,  $J=9.2$  Hz), 132.6, 130.0, 128.5, 115.7.  $^{19}\text{F}$  NMR (376 MHz,  $\text{CDCl}_3$ )  $\delta$  -105.86 – -105.98 (m).

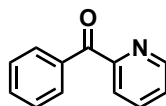

**Phenyl(pyridin-2-yl)methanone (6h)**<sup>7</sup> was prepared following the General Procedure **B**. The crude product was purified by flash chromatography on silica gel (PE/EA =

20:1) to give the product **6h** (28.1 mg, 77% yield) as a colorless oil.  $^1\text{H}$  NMR (400 MHz,  $\text{CDCl}_3$ )  $\delta$  8.68 (s, 1H), 8.10 – 7.95 (m, 3H), 7.88 – 7.80 (m, 1H), 7.58 – 7.52 (m, 1H), 7.49 – 7.38 (m, 3H).  $^{13}\text{C}\{^1\text{H}\}$  NMR (101 MHz,  $\text{CDCl}_3$ )  $\delta$  193.6, 154.9, 148.4, 136.9, 136.1, 132.7, 130.8, 128.0, 126.0, 124.4.

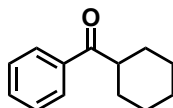

**Cyclohexyl(phenyl)methanone (6i)**<sup>9</sup> was prepared following the General Procedure **B**. The crude product was purified by flash chromatography on silica gel (PE/EA = 10:1) to give the product **6i** (24.5 mg, 65% yield) as a colorless oil.  $^1\text{H}$  NMR (400 MHz,  $\text{CDCl}_3$ )  $\delta$  7.98 – 7.92 (m, 2H), 7.57 – 7.52 (m, 1H), 7.49 – 7.43 (m, 2H), 3.31 – 3.21 (m, 1H), 1.93 – 1.81 (m, 4H), 1.78 – 1.70 (m, 1H), 1.55 – 1.34 (m, 4H), 1.33 – 1.22 (m, 1H).  $^{13}\text{C}\{^1\text{H}\}$  NMR (101 MHz,  $\text{CDCl}_3$ )  $\delta$  204.0, 136.5, 132.9, 128.7, 128.4, 45.8, 29.6, 26.1, 26.0.

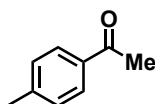

**(p-Tolyl)ethan-1-one (6k)**<sup>7</sup> was prepared following the General Procedure **B**. The crude product was purified by flash chromatography on silica gel (PE/EA = 20:1) to give the product **6k** (20.9 mg, 78% yield) as a colorless oil.  $^1\text{H}$  NMR (400 MHz,  $\text{CDCl}_3$ )  $\delta$  7.88 (d,  $J$  = 8.2 Hz, 2H), 7.28 (d,  $J$  = 8.0 Hz, 2H), 2.60 (s, 3H), 2.43 (s, 3H).  $^{13}\text{C}\{^1\text{H}\}$  NMR (101 MHz,  $\text{CDCl}_3$ )  $\delta$  197.5, 143.7, 134.6, 129.1, 128.3, 26.3, 21.4.

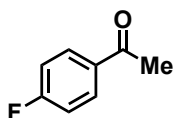

**(4-Fluorophenyl)ethan-1-one (6l)**<sup>7</sup> was prepared following the General Procedure **B**. The crude product was purified by flash chromatography on silica gel (PE/EA = 20:1) to give the product **6l** (17.4 mg, 63% yield) as a colorless oil.  $^1\text{H}$  NMR (400 MHz,  $\text{CDCl}_3$ )  $\delta$  8.01 – 7.94 (m, 2H), 7.16 – 7.09 (m, 2H), 2.59 (d,  $J$  = 0.7 Hz, 3H).  $^{13}\text{C}\{^1\text{H}\}$  NMR (101 MHz,  $\text{CDCl}_3$ )  $\delta$  196.6, 165.9 (d,  $J$  = 254.6 Hz), 133.7 (d,  $J$  = 2.9 Hz), 131.1 (d,  $J$  = 9.4 Hz), 115.9, 26.7.  $^{19}\text{F}$  NMR (376 MHz,  $\text{CDCl}_3$ )  $\delta$  -105.34.

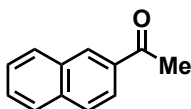

**1-(Naphthalen-2-yl)ethan-1-one (6m)**<sup>7</sup> was prepared following the General Procedure B. The crude product was purified by flash chromatography on silica gel (PE/EA = 20:1) to give the product **6m** (26.5 mg, 78% yield) as a colorless oil. <sup>1</sup>H NMR (400 MHz, CDCl<sub>3</sub>) δ 8.47 (s, 1H), 8.04 (dd, *J* = 8.6, 1.7 Hz, 1H), 7.97 (d, *J* = 8.0 Hz, 1H), 7.92 – 7.87 (m, 2H), 7.63 – 7.54 (m, 2H), 2.73 (s, 3H). <sup>13</sup>C{<sup>1</sup>H} NMR (101 MHz, CDCl<sub>3</sub>) δ 198.2, 135.7, 134.6, 132.6, 130.3, 129.7, 128.6, 128.5, 127.9, 126.9, 124.0, 26.8.

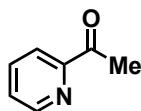

**1-(Pyridin-2-yl)ethan-1-one (6n)**<sup>8</sup> was prepared following the General Procedure C. The crude product was purified by flash chromatography on silica gel (PE/EA = 10:1) to give the product **6n** (18.7 mg, 77% yield) as a colorless oil. <sup>1</sup>H NMR (400 MHz, CDCl<sub>3</sub>) δ 8.61 – 8.54 (m, 1H), 7.97 – 7.91 (m, 1H), 7.75 – 7.70 (m, 1H), 7.41 – 7.32 (m, 1H), 2.65 – 2.61 (m, 3H). <sup>13</sup>C{<sup>1</sup>H} NMR (101 MHz, CDCl<sub>3</sub>) δ 200.0, 153.5, 148.9, 136.8, 127.0, 121.5, 25.7.

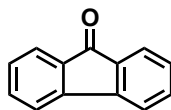

**9H-Fluoren-9-one (6o)**<sup>7</sup> was prepared following the General Procedure C. The crude product was purified by flash chromatography on silica gel (PE/EA = 20:1) to give the product **6o** (29.8 mg, 83% yield) as a colorless oil. <sup>1</sup>H NMR (400 MHz, CDCl<sub>3</sub>) δ 7.68 – 7.64 (m, 2H), 7.54 – 7.46 (m, 4H), 7.32 – 7.27 (m, 2H). <sup>13</sup>C{<sup>1</sup>H} NMR (101 MHz, CDCl<sub>3</sub>) δ 194.0, 144.5, 134.8, 134.2, 129.2, 124.4, 120.4.

## 7. References

- [1] E. Le Saux, E. Georgiou, I. A. Dmitriev, W. C. Hartley and P. Melchiorre, Photochemical organocatalytic functionalization of pyridines *via* pyridinyl radicals, *J. Am. Chem. Soc.*, 2023, **145**, 47–52.
- [2] Kavarnos, G. J. Energetics of photoinduced electron transfer, in fundamentals of photoinduced electron transfer, VCH: New-York, Weinheim, 1993, pp 29–37.
- [3] L. Buzzetti, A. Prieto, S. R. Roy and P. Melchiorre, Radical-based C-C bond-forming processes enabled by the photoexcitation of 4-alkyl-1,4- dihydropyridines,

*Angew. Chem., Int. Ed.*, 2017, **56**, 15039–15043; *Angew. Chem.*, 2017, **129**, 15235–15239.

[4] L. Gu, J. Cheng, H. Zhang, L. Zhang, Copper-catalyzed aerobic oxidative cleavage of C-C bonds in epoxides leading to aryl ketones, *J. Org. Chem.*, 2014, **79**, 8453–8456.

[5] J.-J. Ai, B.-B. Liu, J. Li, F. Wang, C.-M. Huang, W. Rao, S.-Y. Wang, Fe-S catalyst generated in situ from Fe(III)- and S<sub>3</sub><sup>2-</sup>-promoted aerobic oxidation of terminal alkenes, *Org. Lett.*, 2021, **23**, 4705–4709.

[6] P. Sharma, S. Rohilla, N. Jain, Palladium catalyzed carbonylative coupling for synthesis of arylketones and arylesters using chloroform as the carbon monoxide source, *J. Org. Chem.*, 2017, **82**, 1105–1113.

[7] A. Wang, J. Huang, C. Zhao, Y. Fan, J. Qian, Q. Chen, M He and W. Zhou, A simple and convenient strategy for the oxidation of C(sp<sup>3</sup>)-H bonds based on  $\gamma$ -valerolactone, *Green Chem.*, 2024, **26**, 353–361.

[8] J. Zhong, W. Zhou, X. Yan, Y. Xia, H. Xiang, X. Zhou, Selective activation of unstrained C(O)-C bond in ketone Suzuki-Miyaura coupling reaction enabled by hydride-transfer strategy, *Org. Lett.*, 2022, **24**, 1372–1377.

[9] Y. Kuang, Y. Wang, Dirhodium(II)-catalyzed cross-coupling reactions of aryl aldehydes with arylboronic acids in water, *Eur. J. Org. Chem.*, 2014, **6**, 1163–1166.

[10] L. Ruan, M. Shi, N. Li, X. Ding, F. Yang and J. Tang, Practical approach for preparation of unsymmetric benzils from  $\beta$ -Ketoaldehydes, *Org. Lett.*, 2014, **16**, 733–735.

[11] J. Templ, M. Schnürch, Selective  $\alpha$ -methylation of aryl ketones using quaternary ammonium salts as solid methylating agents, *J. Org. Chem.*, 2022, **87**, 4305–4315.

[12] J. Fan, Y. Peng, W. Xu, A. Wang, J. Xu, H. Yu, X. Lin, Q. Wu, Double enzyme-catalyzed one-pot synthesis of enantiocomplementary vicinal fluoro alcohols, *Org. Lett.*, 2020, **22**, 5446–5450.

[13] G. Sun, X. Lv, Y. Zhang, M. Lei, L. Hu, Palladium-catalyzed formylation of aryl iodides with HCOOH as CO source, *Org. Lett.*, 2017, **19**, 4235–4238.

[14] G. Dilauro, C. S. Azzollini, P. Vitale, A. Salomone, F. M. Perna, V. Capriati, Scalable negishi coupling between organozinc compounds and (hetero)aryl bromides under aerobic conditions when using bulk water or deep eutectic solvents with no additional ligands, *Angew. Chem., Int. Ed.*, 2021, **60**, 10632–10636.

[15] S. Shigemura, T. Kurahashi, Coupling reaction of aryl halides with orthoformate ester, *Synlett*, 2025, **36**, 894–898.

- [16] Y. Fan, D. W. Kang, S. Labalme, J. Li, W. Lin, Enhanced energy transfer in a  $\pi$ -conjugated covalent organic framework facilitates excited-state nickel catalysis, *Angew. Chem., Int. Ed.*, 2023, **62**, e202218908.
- [17] Q. Fan, D. Liu, Z. Xie, Z. Le, H. Zhu, X. Song, Visible-light photocatalytic highly selective oxidation of alcohols into carbonyl compounds by CsPbBr<sub>3</sub> Perovskite, *J. Org. Chem.*, 2023, **88**, 14559–14570.
- [18] S. S. Zimmerman, K. Alpa, E. C. Garnier-Amblard, P. Mullasseril, N. L. Kurtkaya, S. Gyoneva, K. B. Hansen, S. F. Traynelis, D. C. Liotta, Design, synthesis, and Structure-Activity relationship of a novel series of GluN2C-selective potentiators, *J. Med. Chem.*, 2014, **57**, 2334–2356.
- [19] T. Murata, H. Tsutsui, I. Shiina, (*E*)-Selective weinreb amide-type Horner-Wadsworth-Emmons reaction: effect of reaction conditions, substrate scope, isolation of a reactive magnesium phosphoenolate, and applications, *J. Org. Chem.*, 2024, **89**, 15414–15435.
- [20] S. Tripathi, M. Chakravarty, Unveiling the long-awaited aldehyde intermediate in oxidative dephosphorylation: a unique approach to access useful carboxaldehydes, *Chem.-A Eur. J.*, 2025, **31**, e202403300.
- [21] S. Yaragorla, T. Khan, A. Behera, Oxidative cleavage of Csp<sup>3</sup>-Csp<sup>2</sup> and Csp<sup>3</sup>-H bonds with KO<sup>t</sup>Bu: highly robust and practical synthesis of diaryl/(het-Ar) ketones, *J. Org. Chem.*, 2023, **88**, 2103–2112.
- [22] L. Ren, N. Jiao, Pd/Cu-Cocatalyzed aerobic oxidative carbonylative homocoupling of arylboronic acids and CO: a highly selective approach to diaryl ketones, *Chemistry - An Asian Journal*, 2014, **9**, 2411–2414.



## 8. NMR Spectra

### Benzophenone (2a): $^1\text{H}$ NMR (400 MHz, $\text{CDCl}_3$ )

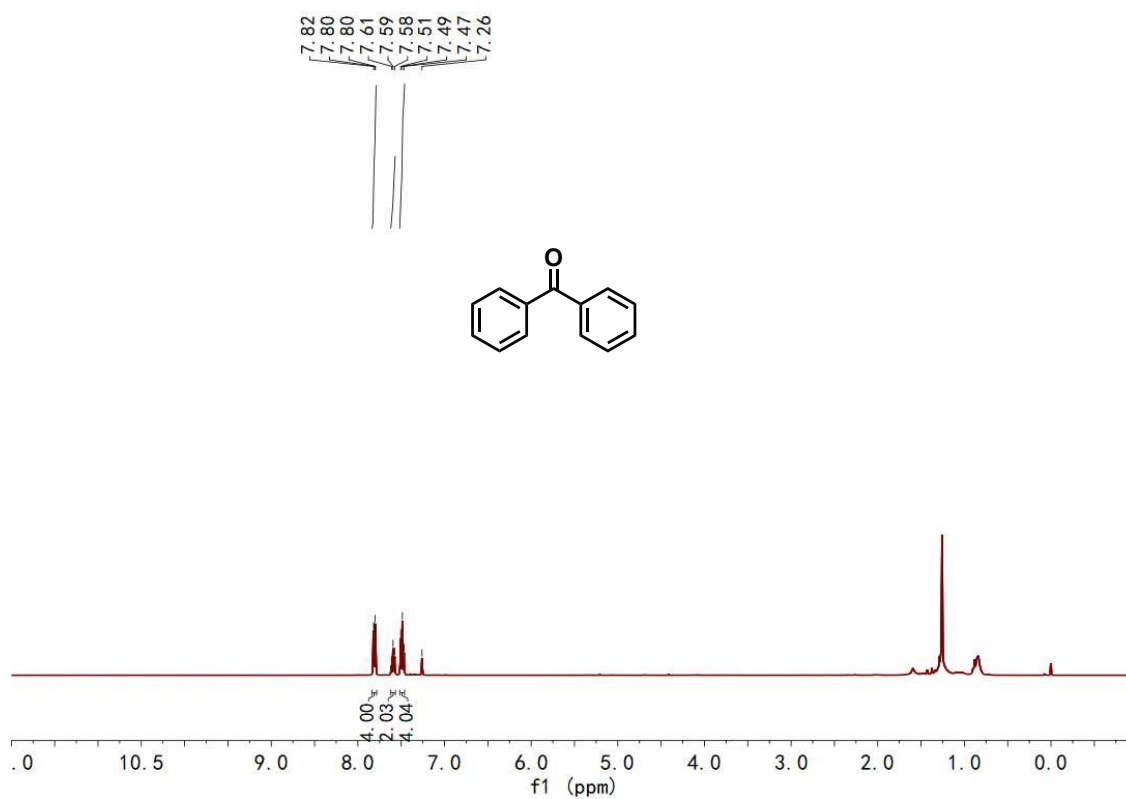

### Benzophenone (2a): $^{13}\text{C}\{^1\text{H}\}$ NMR (101 MHz, $\text{CDCl}_3$ )

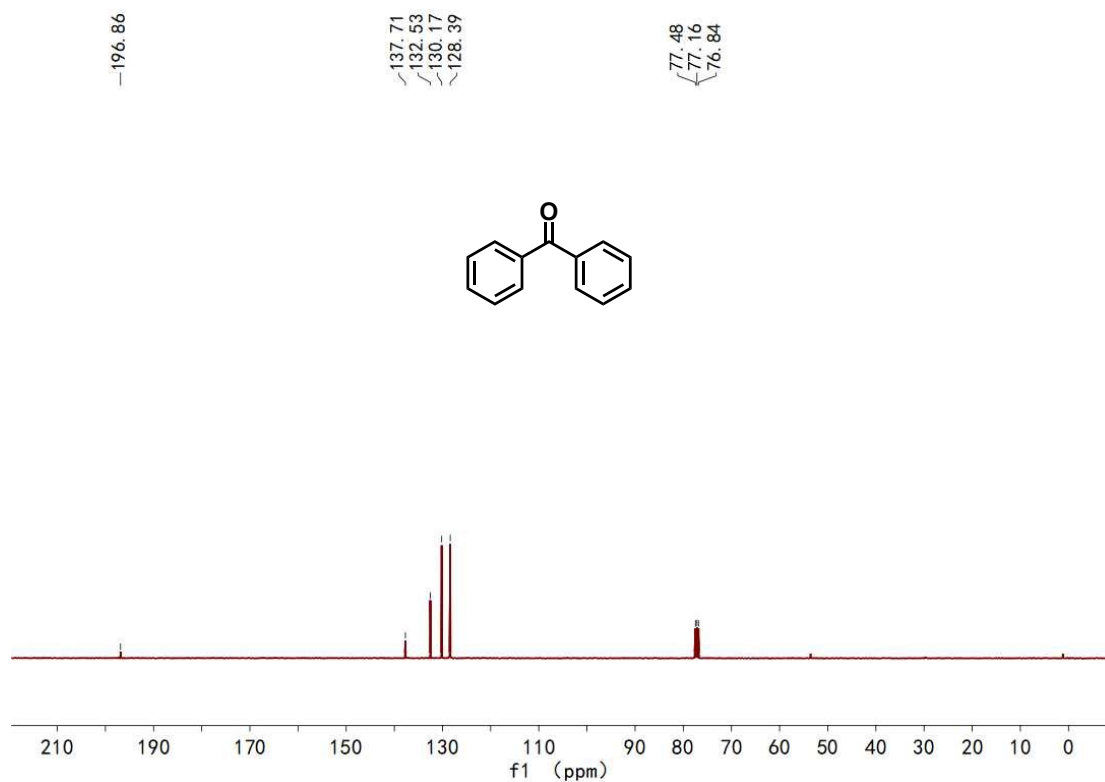

Phenyl(*m*-tolyl)methanone (2b):  $^1\text{H}$  NMR (400 MHz,  $\text{CDCl}_3$ )

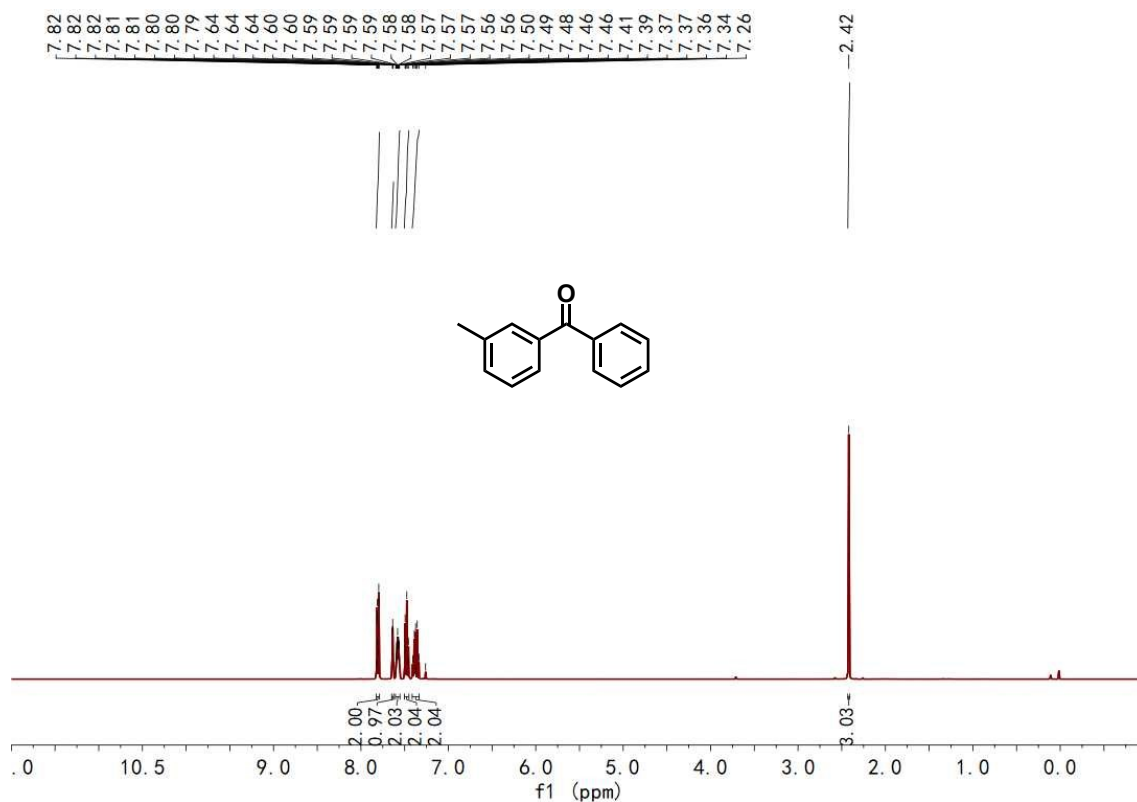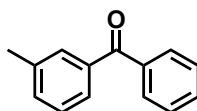

Phenyl(*m*-tolyl)methanone (2b):  $^{13}\text{C}\{^1\text{H}\}$  NMR (101 MHz,  $\text{CDCl}_3$ )

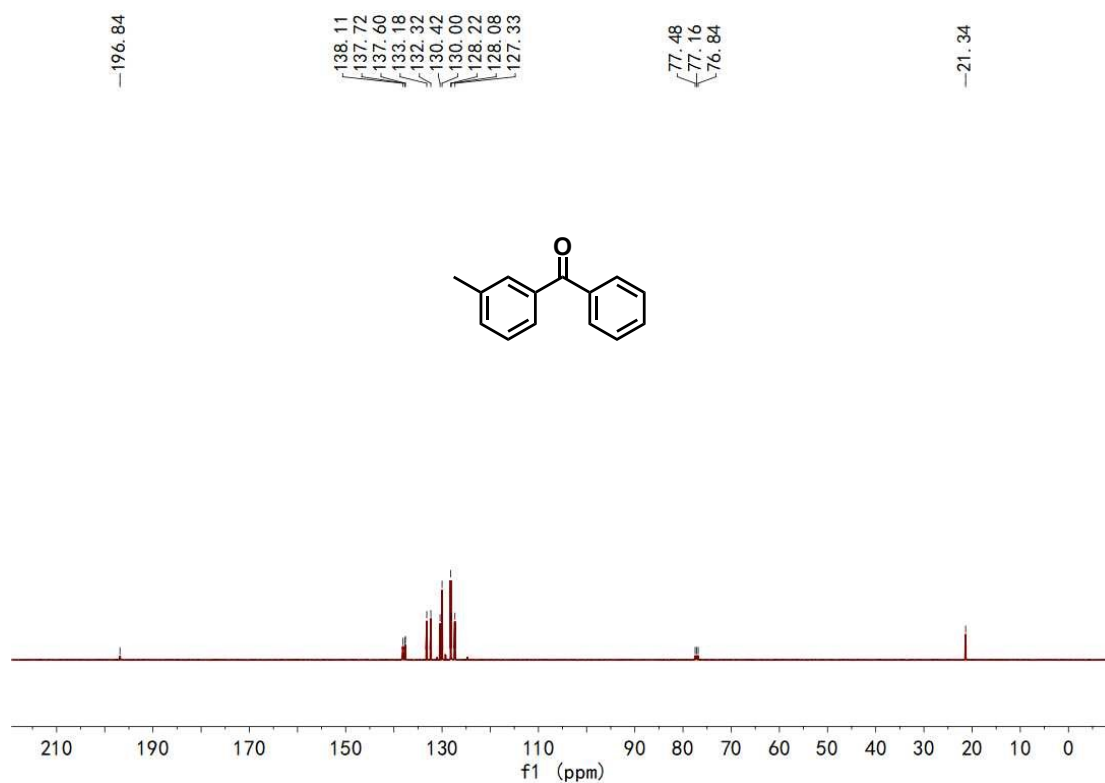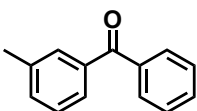

**Di-*p*-tolylmethanone (2c):  $^1\text{H}$  NMR (400 MHz,  $\text{CDCl}_3$ )**

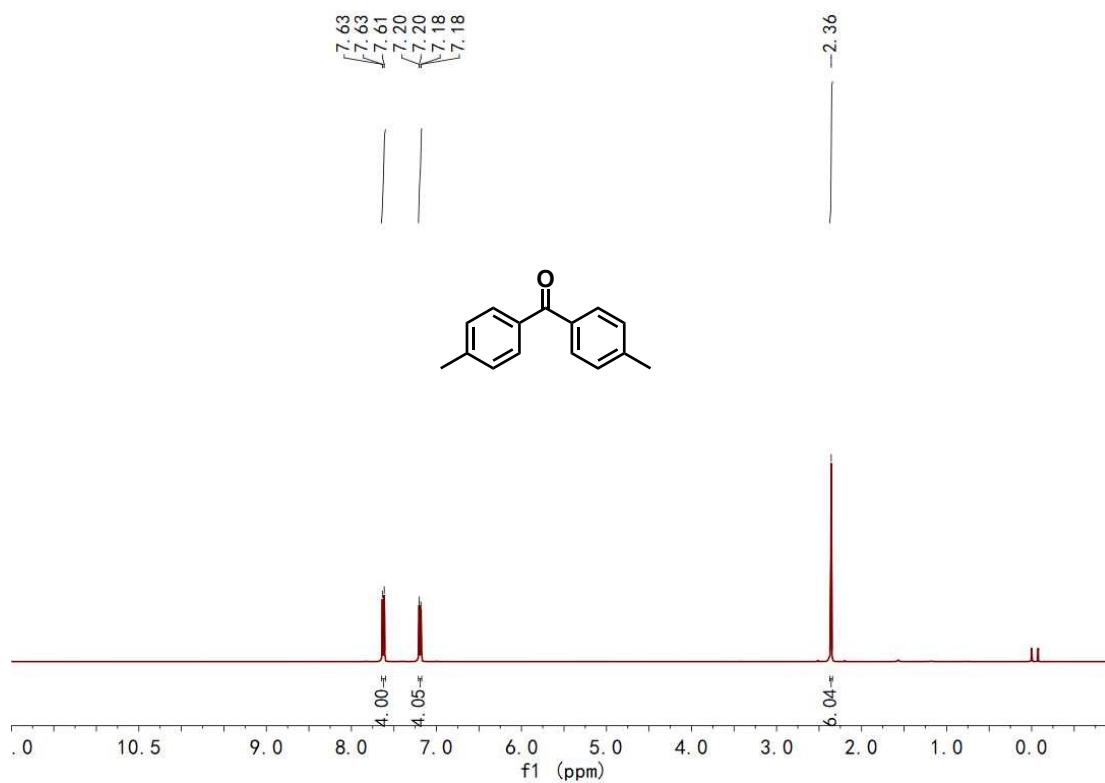

**Di-*p*-tolylmethanone(2c):  $^{13}\text{C}\{^1\text{H}\}$  NMR (101 MHz,  $\text{CDCl}_3$ )**

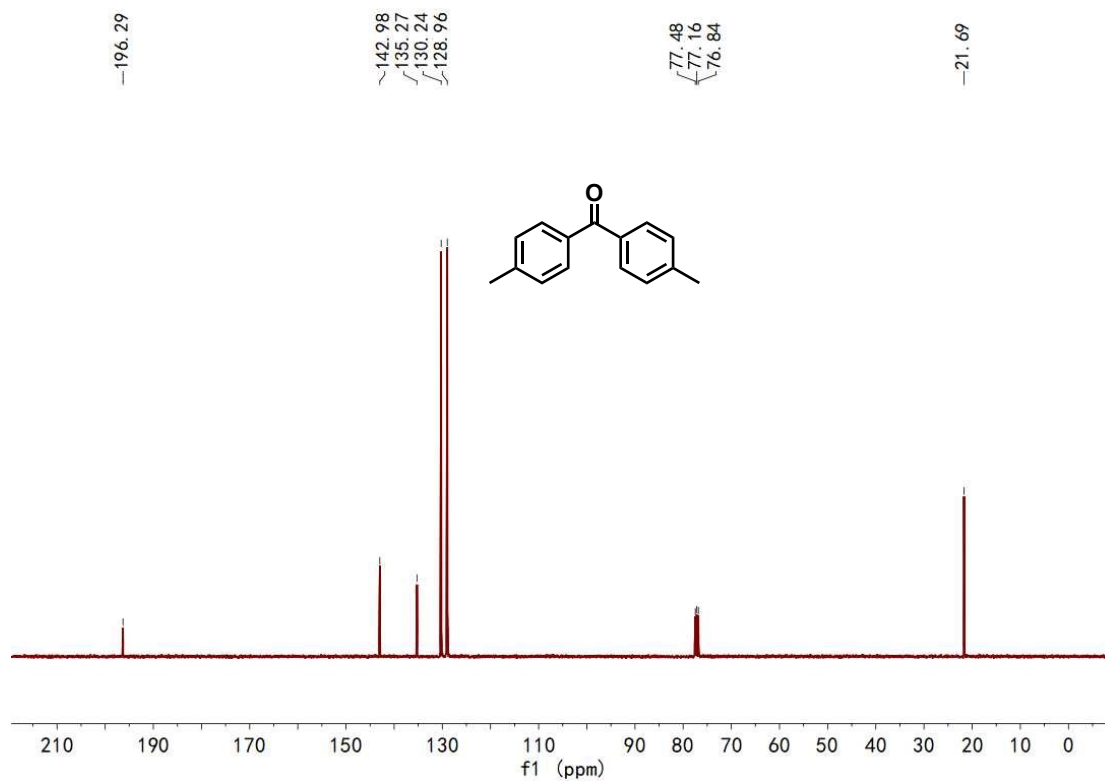

**[1,1'-Biphenyl]-4-yl(phenyl)methanone (2d):  $^1\text{H}$  NMR (400 MHz,  $\text{CDCl}_3$ )**

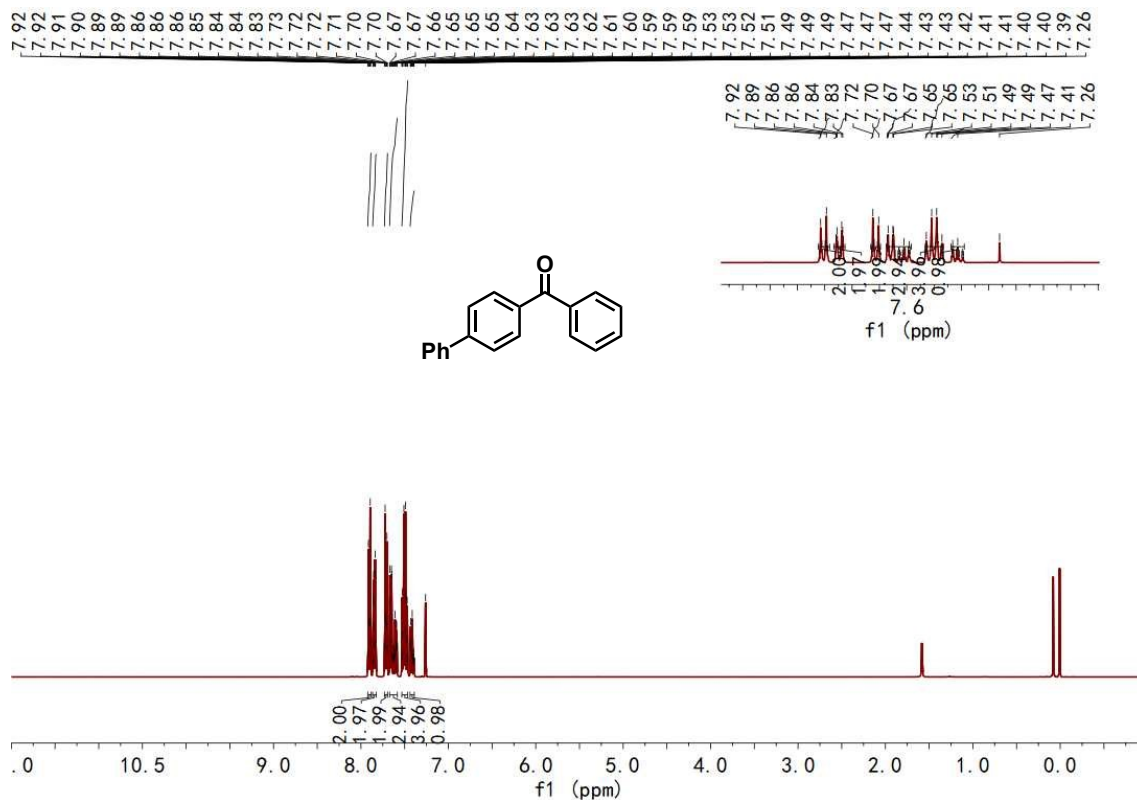

**[1,1'-Biphenyl]-4-yl(phenyl)methanone (2d):  $^{13}\text{C}\{^1\text{H}\}$  NMR (101 MHz,  $\text{CDCl}_3$ )**

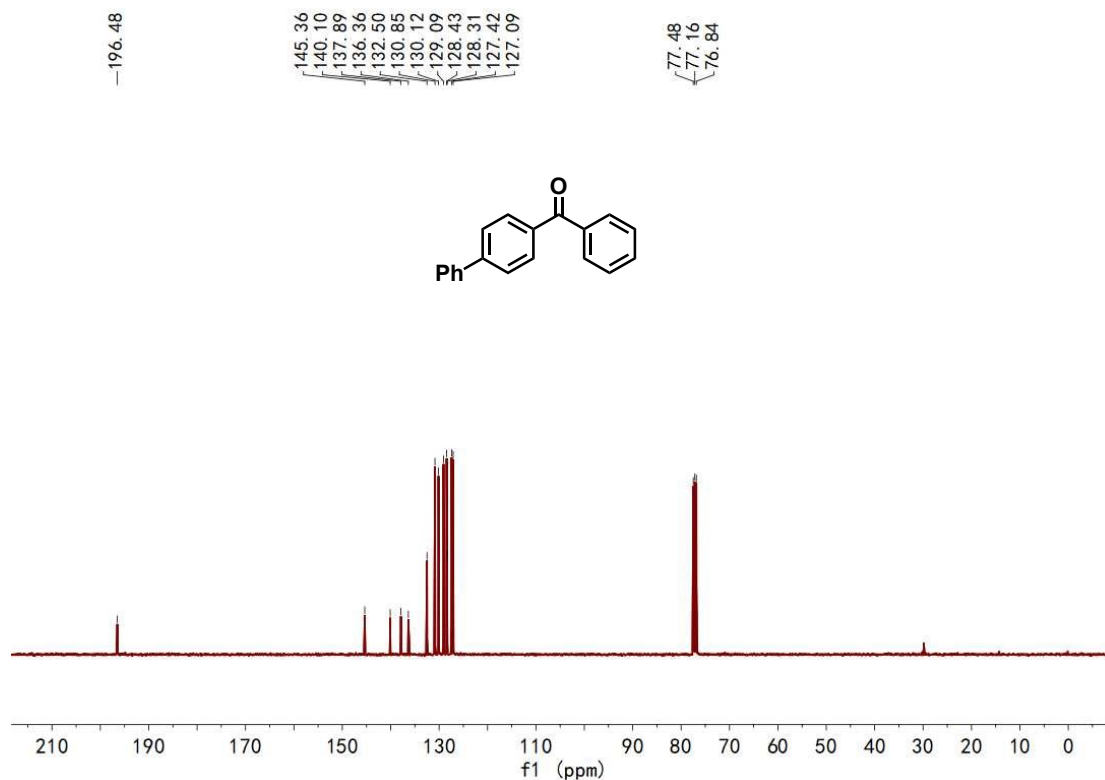

**(4-Nitrophenyl)(phenyl)methanone (2e):  $^1\text{H}$  NMR (400 MHz,  $\text{CDCl}_3$ )**

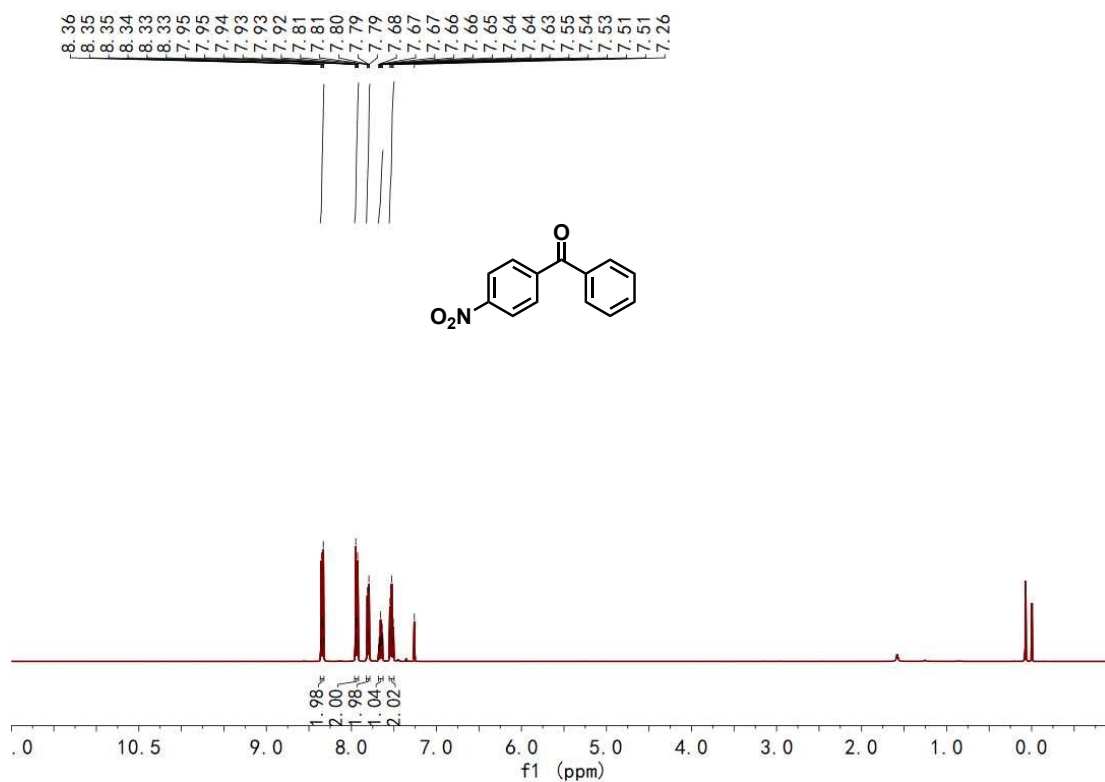

**(4-Nitrophenyl)(phenyl)methanone (2e):  $^{13}\text{C}\{^1\text{H}\}$  NMR (101 MHz,  $\text{CDCl}_3$ )**

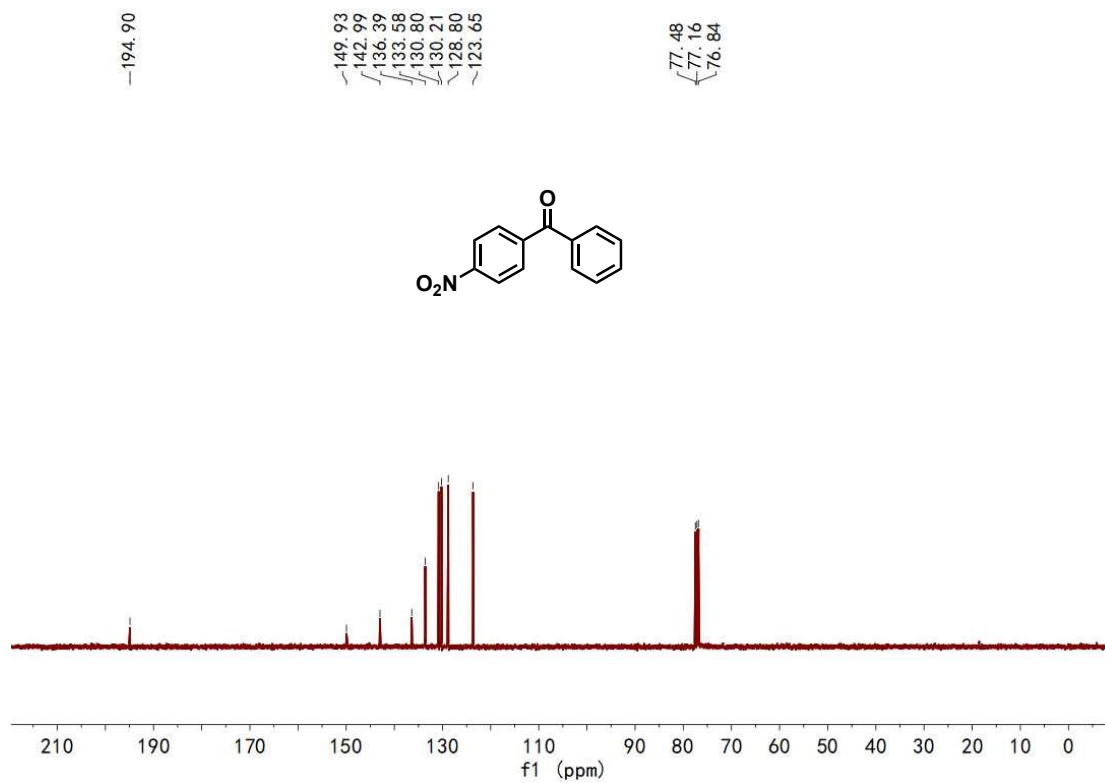

Phenyl(4-(trifluoromethyl)phenyl)methanone (2f):  $^1\text{H}$  NMR (400 MHz,  $\text{CDCl}_3$ )

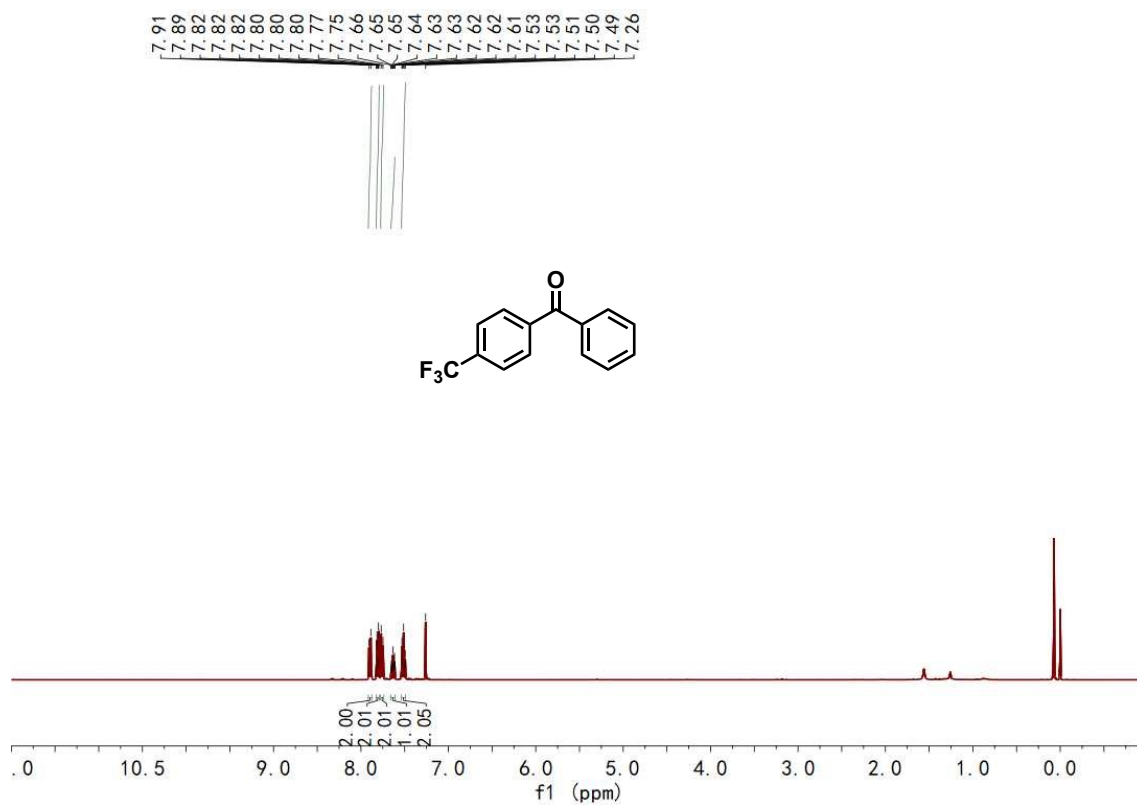

Phenyl(4-(trifluoromethyl)phenyl)methanone (2f):  $^{13}\text{C}\{^1\text{H}\}$  NMR (101 MHz,  $\text{CDCl}_3$ )

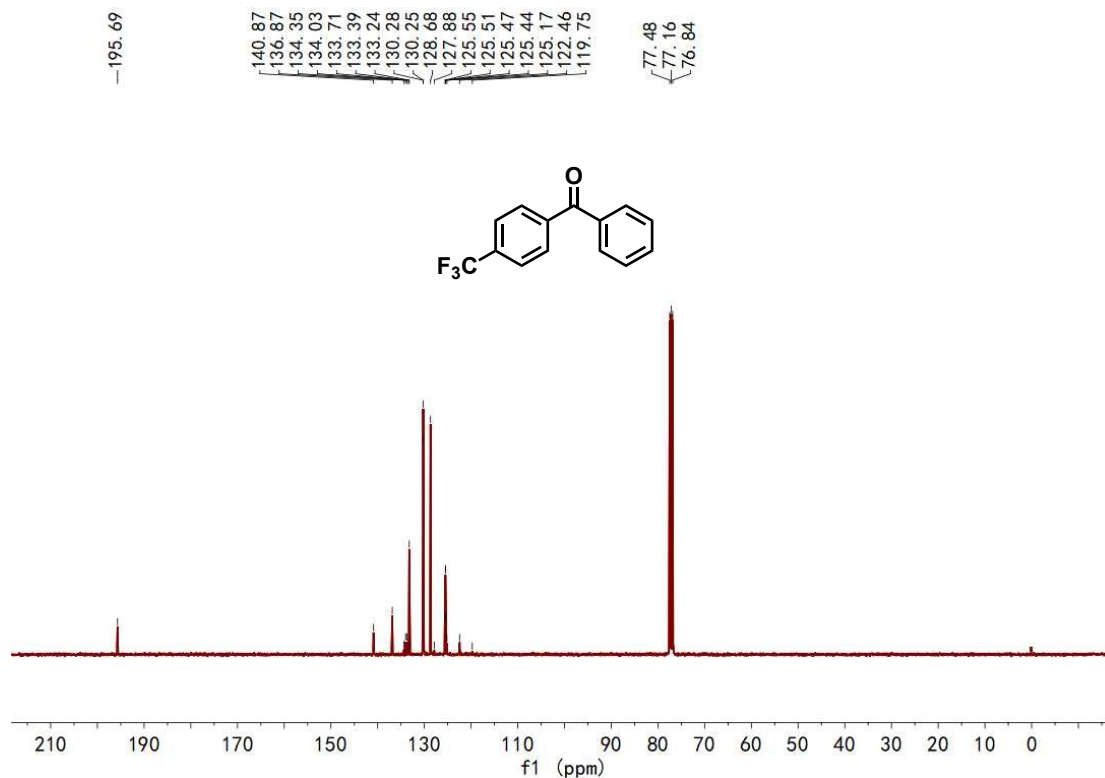

Phenyl(4-(trifluoromethyl)phenyl)methanone (2f):  $^{19}\text{F}$  NMR (376 MHz,  $\text{CDCl}_3$ )

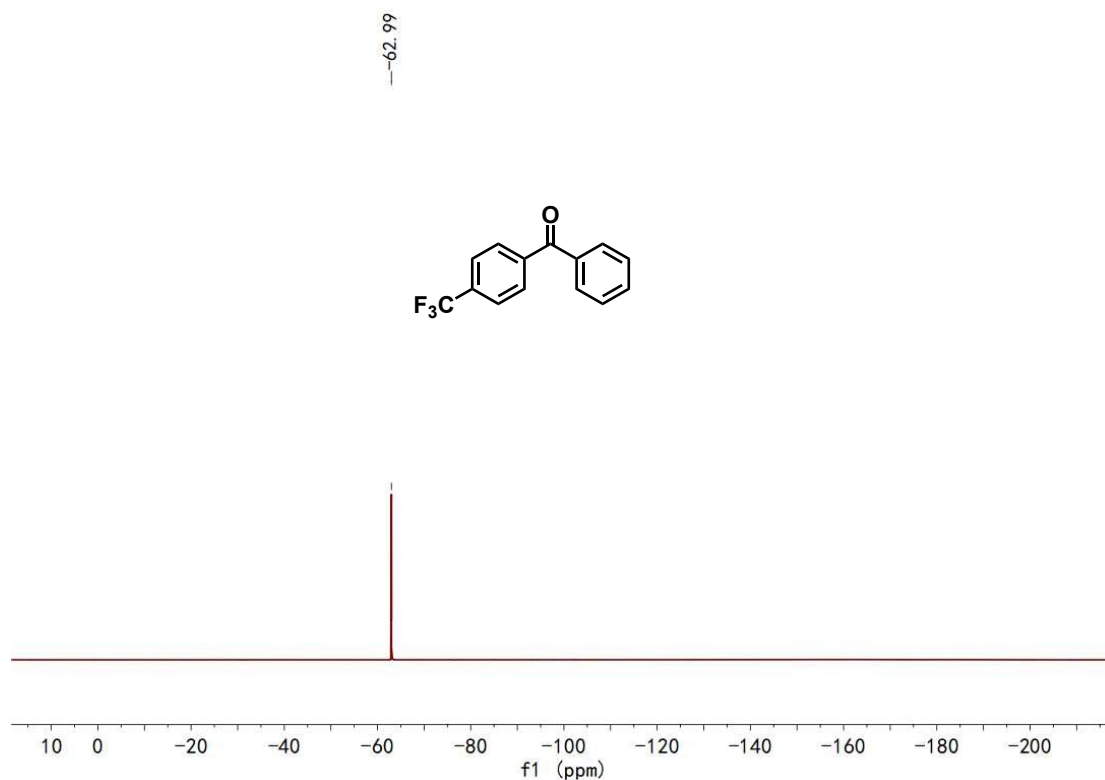

(4-Bromophenyl)(phenyl)methanone (2g):  $^1\text{H}$  NMR (400 MHz,  $\text{CDCl}_3$ )

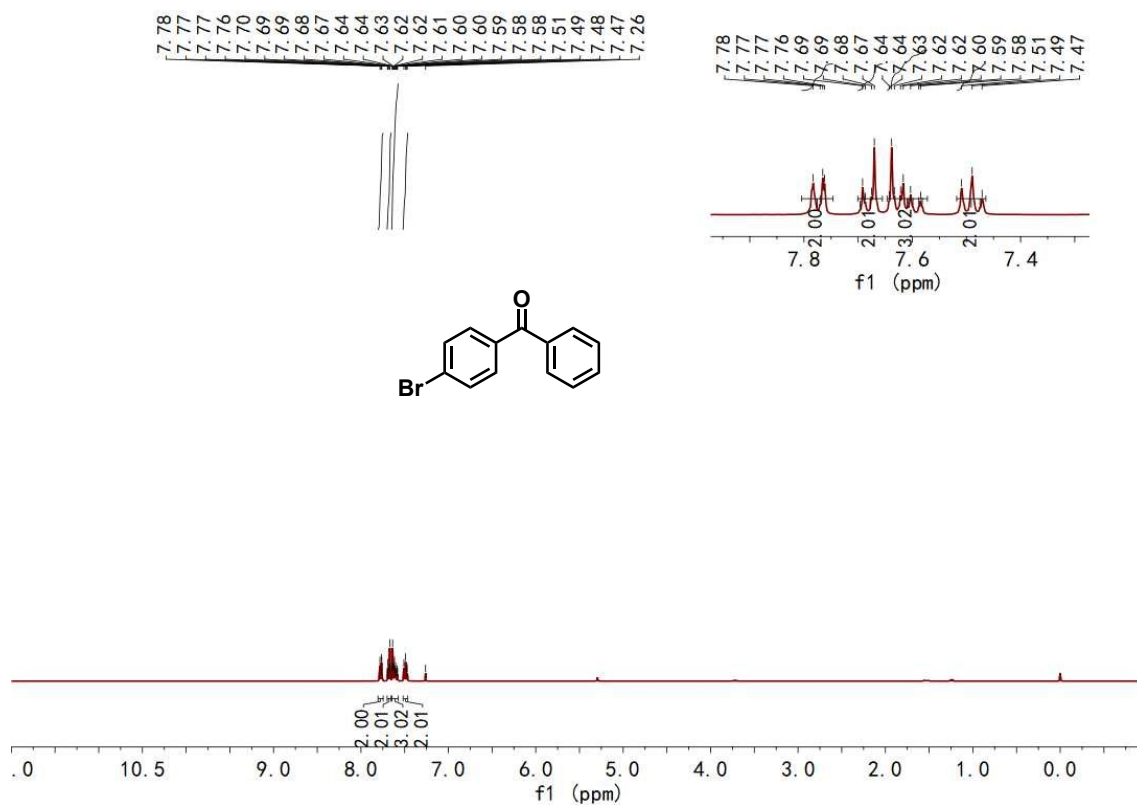

**(4-Bromophenyl)(phenyl)methanon (2g):  $^{13}\text{C}\{^1\text{H}\}$  NMR (101 MHz,  $\text{CDCl}_3$ )**

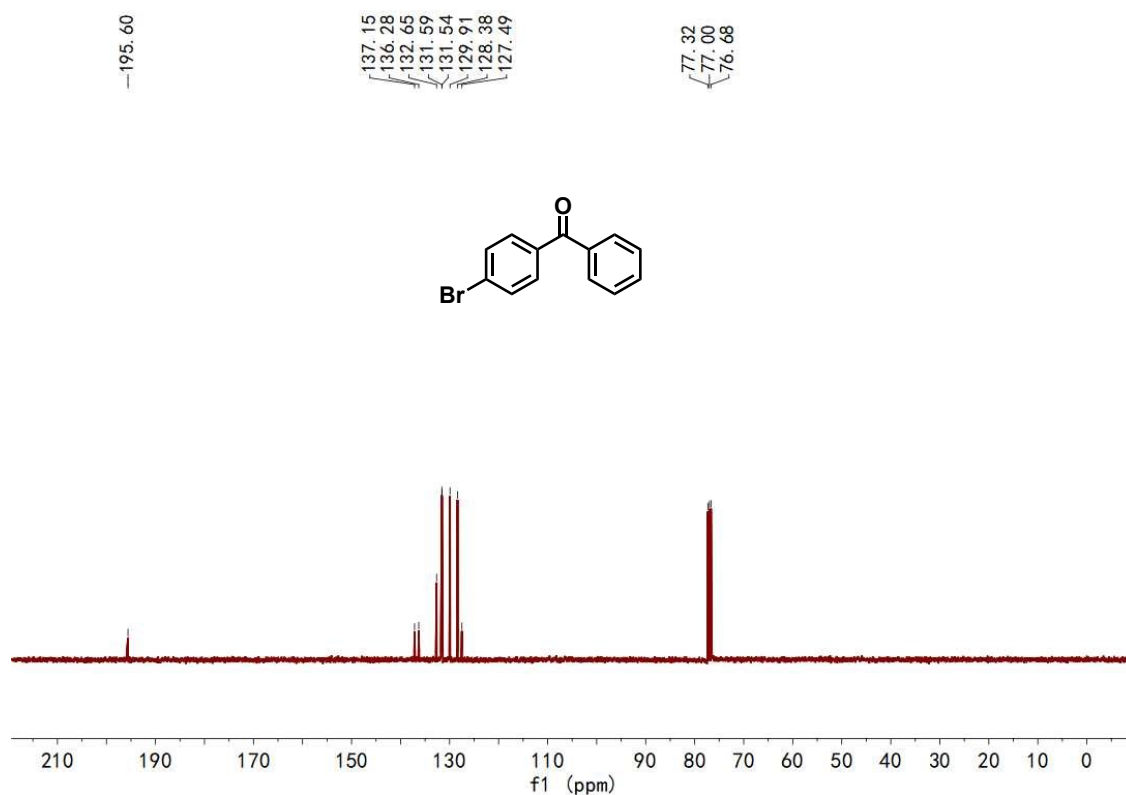

**(3-Chlorophenyl)(phenyl)methanon (2h):  $^1\text{H}$  NMR (400 MHz,  $\text{CDCl}_3$ )**

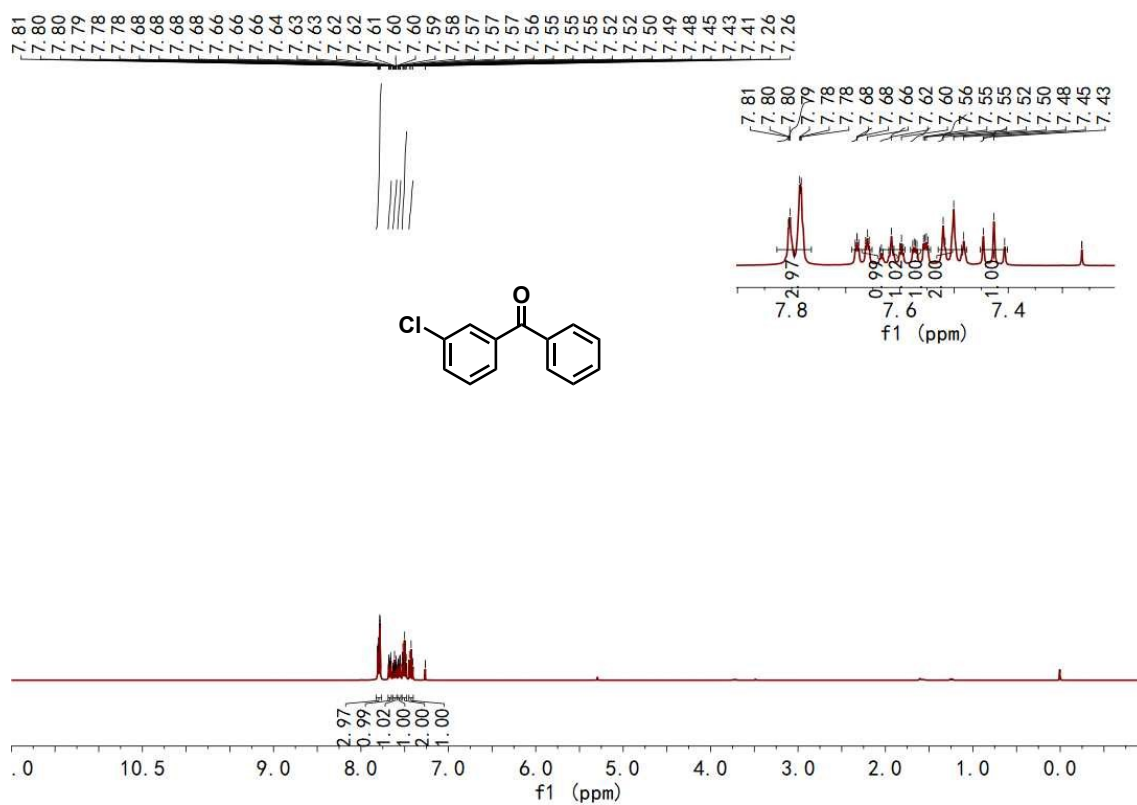

**(3-Chlorophenyl)(phenyl)methanone (2h):  $^{13}\text{C}\{^1\text{H}\}$  NMR (101 MHz,  $\text{CDCl}_3$ )**

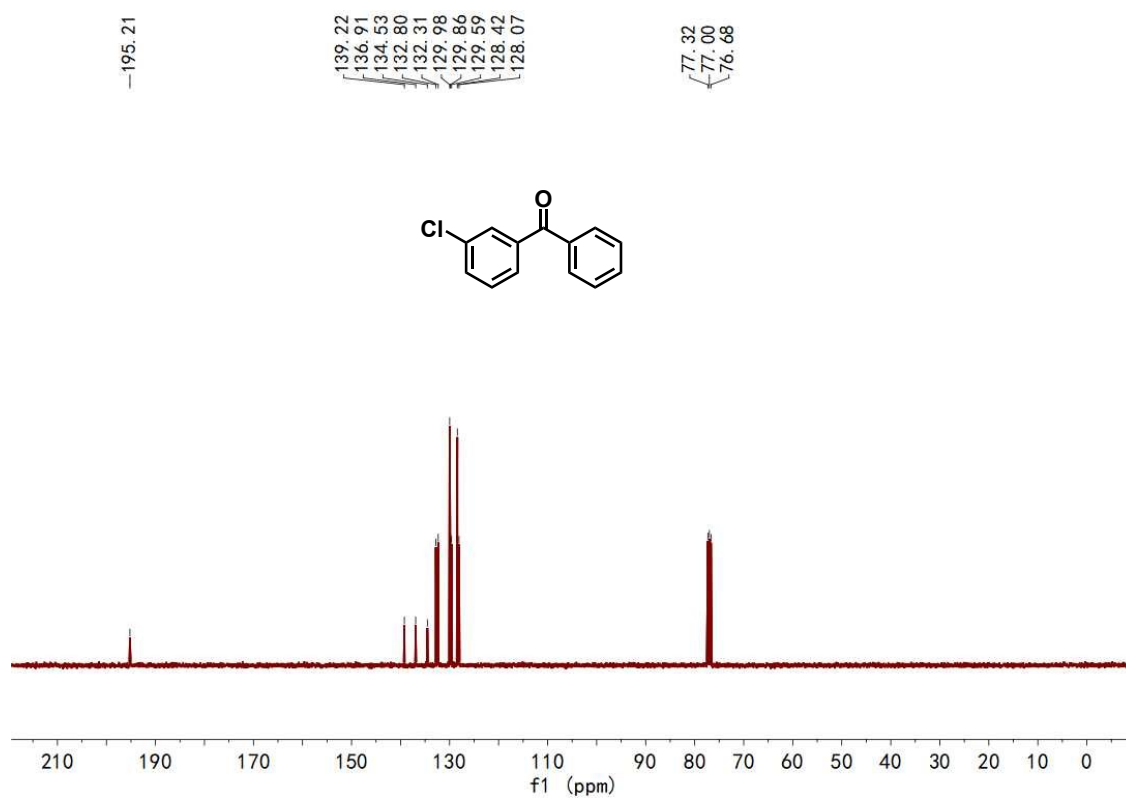

**(2-Fluorophenyl)(phenyl)methanone (2i):  $^1\text{H}$  NMR (400 MHz,  $\text{CDCl}_3$ )**

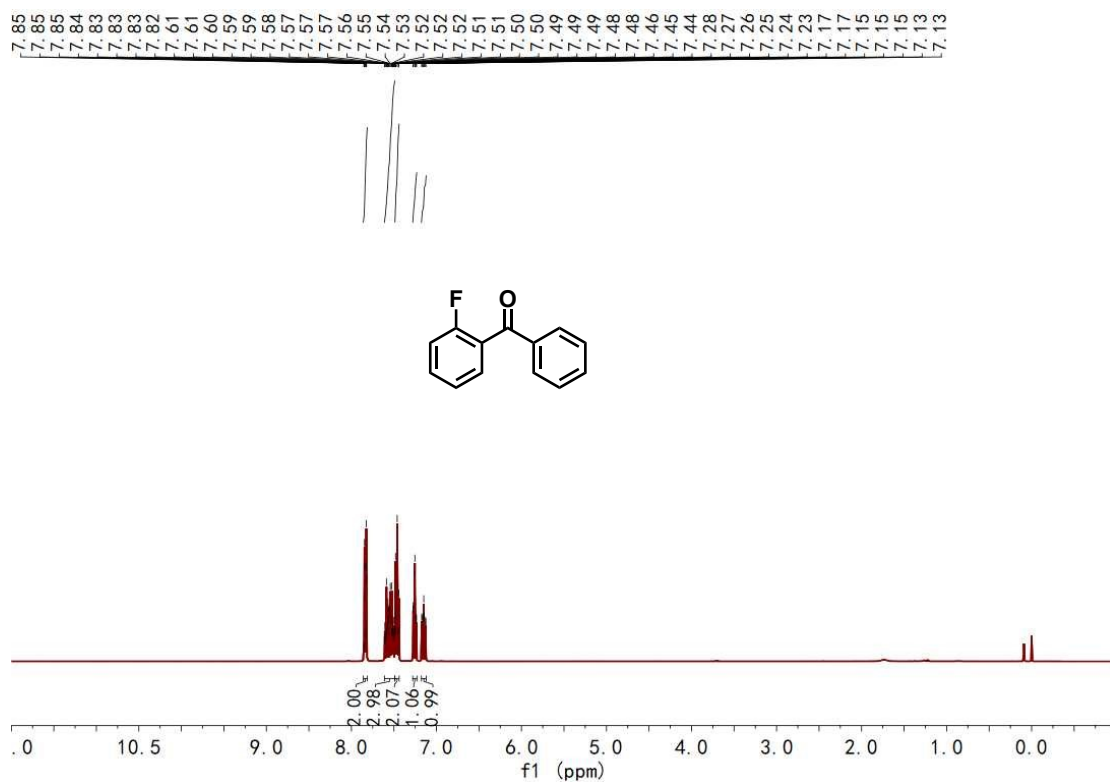

**(2-Fluorophenyl)(phenyl)methanone (2i):  $^{13}\text{C}\{^1\text{H}\}$  NMR (101 MHz,  $\text{CDCl}_3$ )**

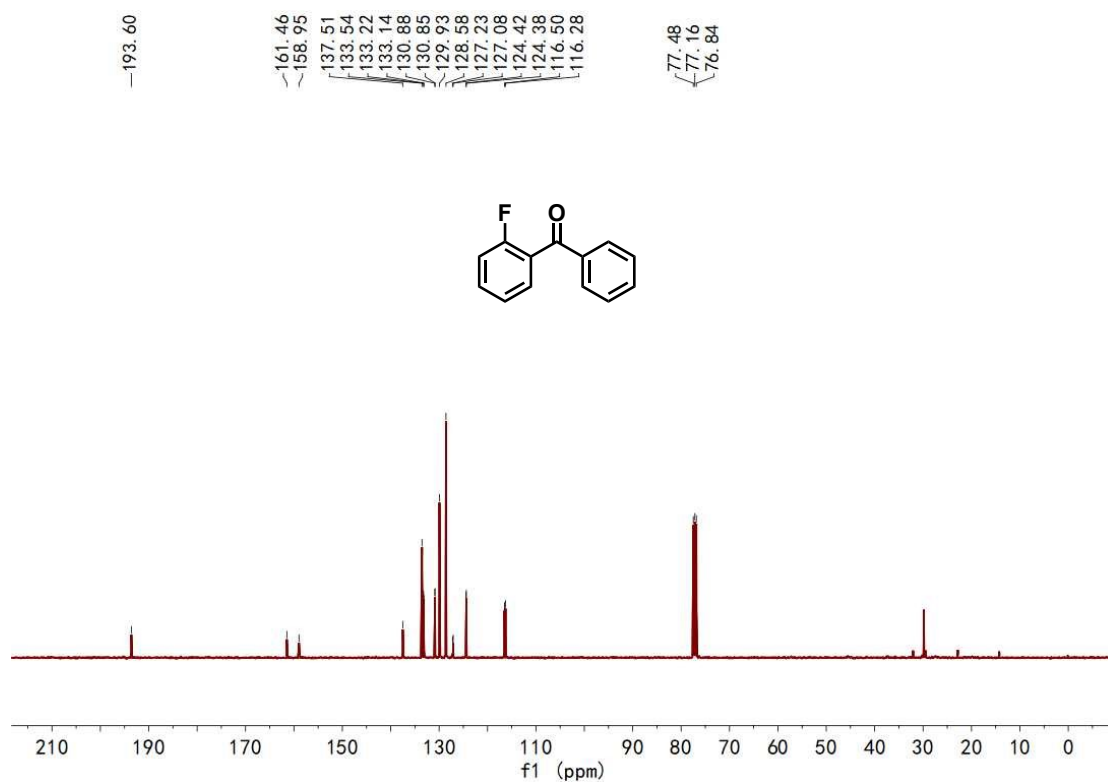

**(2-Fluorophenyl)(phenyl)methanone (2i):  $^{19}\text{F}$  NMR (376 MHz,  $\text{CDCl}_3$ )**

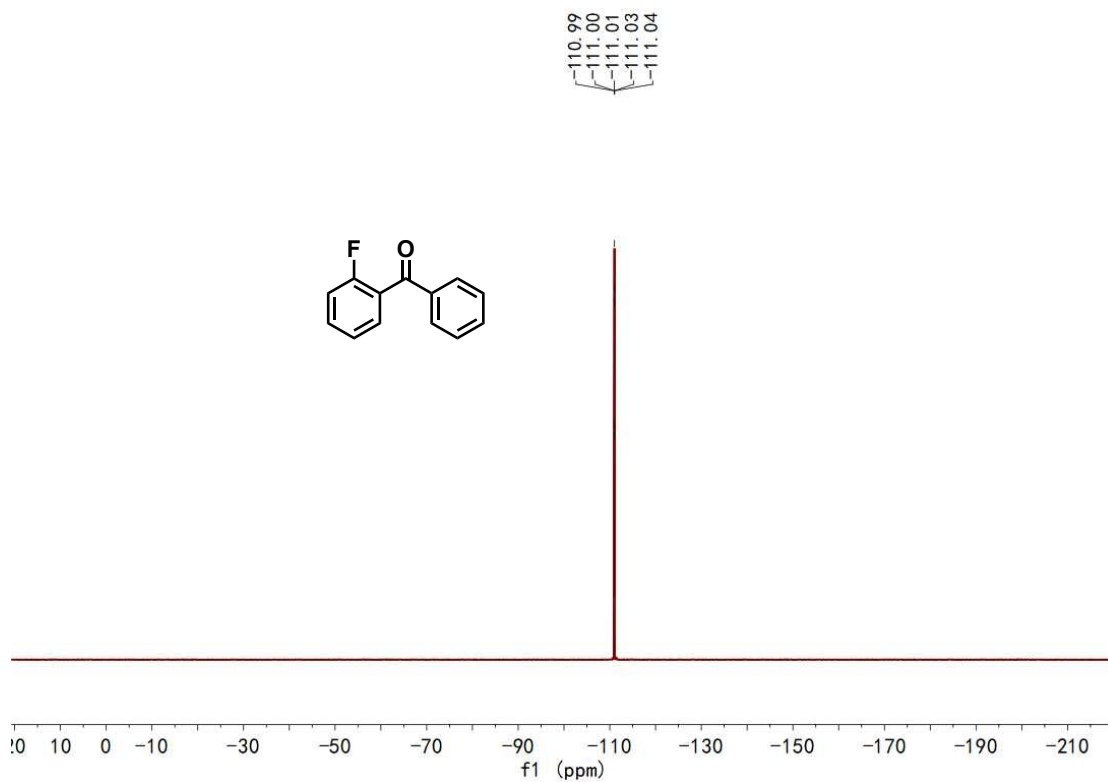

**Bis(4-chlorophenyl)methanone (2j):  $^1\text{H}$  NMR (400 MHz,  $\text{CDCl}_3$ )**

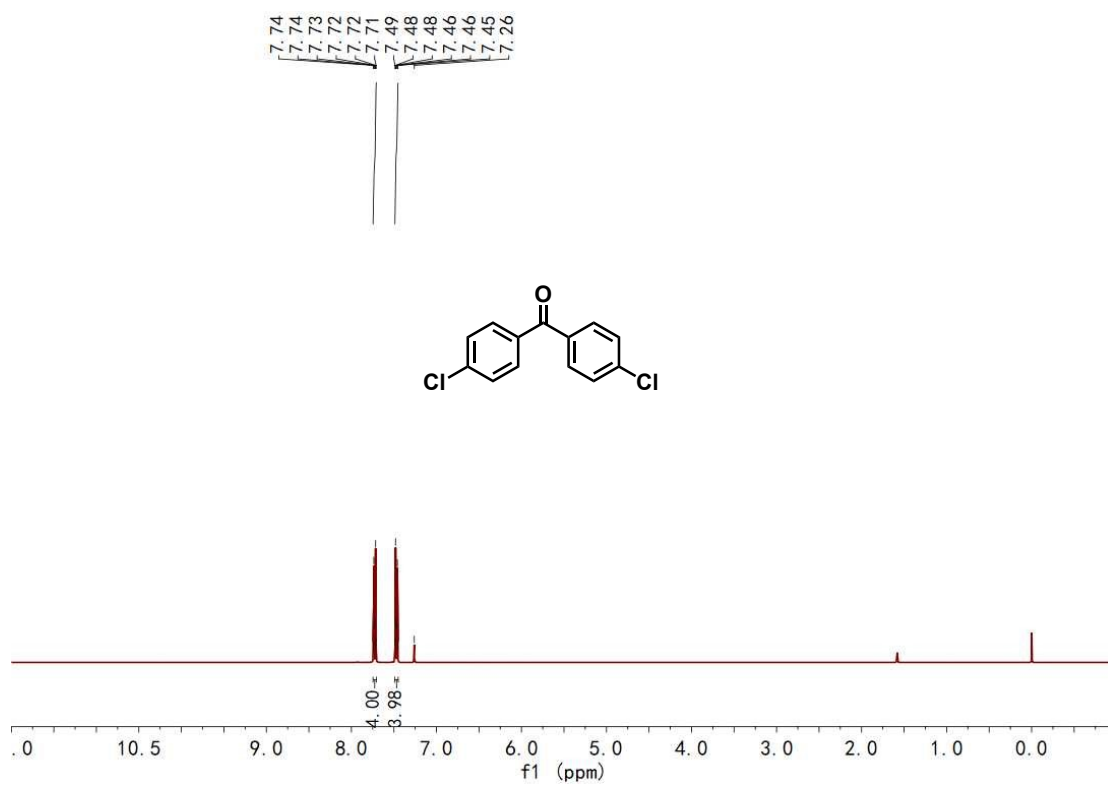

**Bis(4-chlorophenyl)methanone (2j):  $^{13}\text{C}\{^1\text{H}\}$  NMR (101 MHz,  $\text{CDCl}_3$ )**

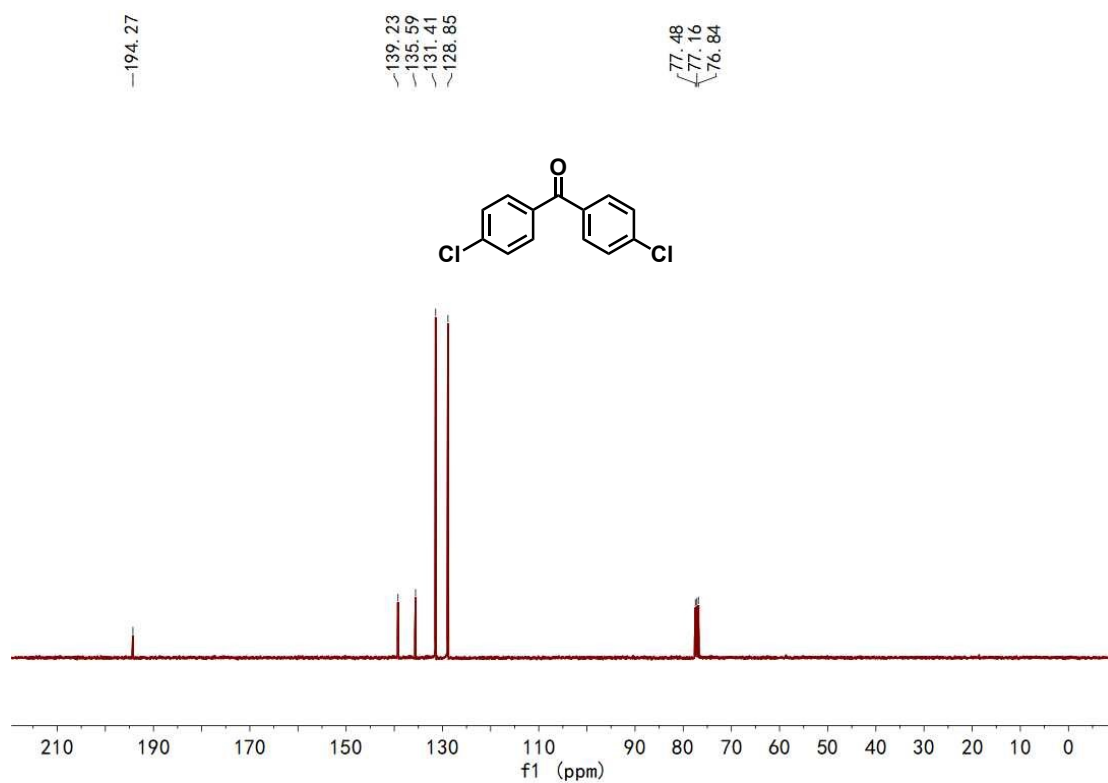

**Bis(4-fluorophenyl)methanone (2k):  $^1\text{H}$  NMR (400 MHz,  $\text{CDCl}_3$ )**

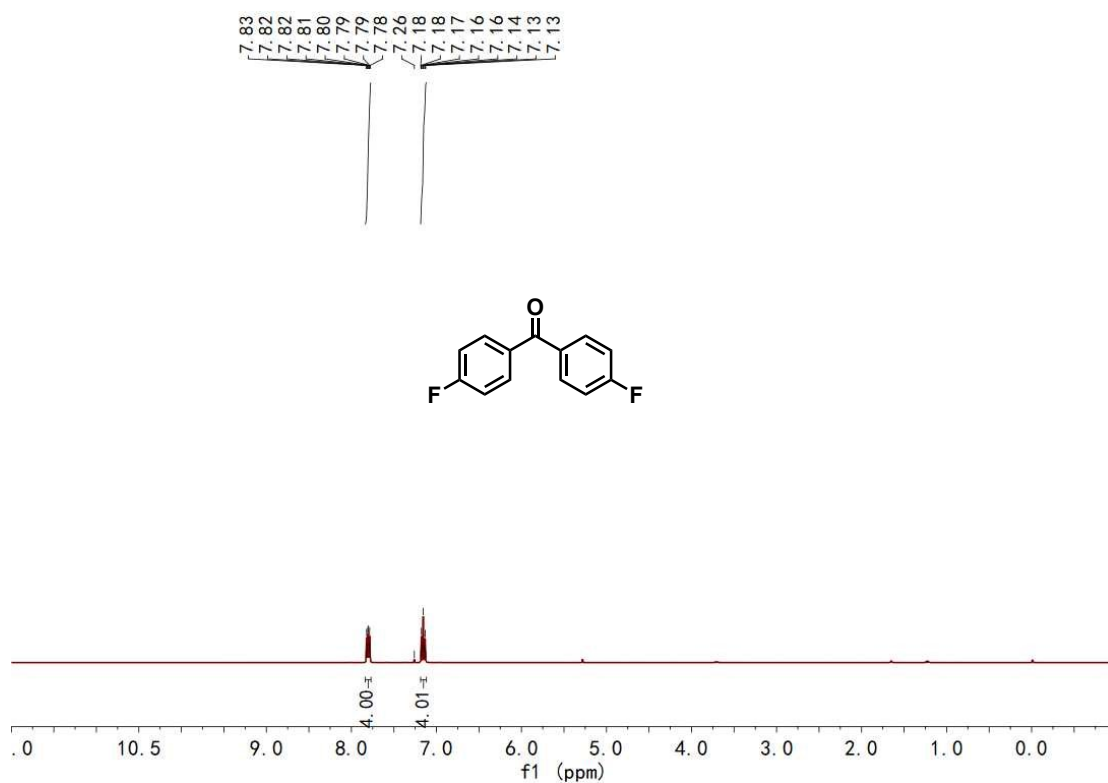

**Bis(4-fluorophenyl)methanone (2k):  $^{13}\text{C}\{^1\text{H}\}$  NMR (101 MHz,  $\text{CDCl}_3$ )**

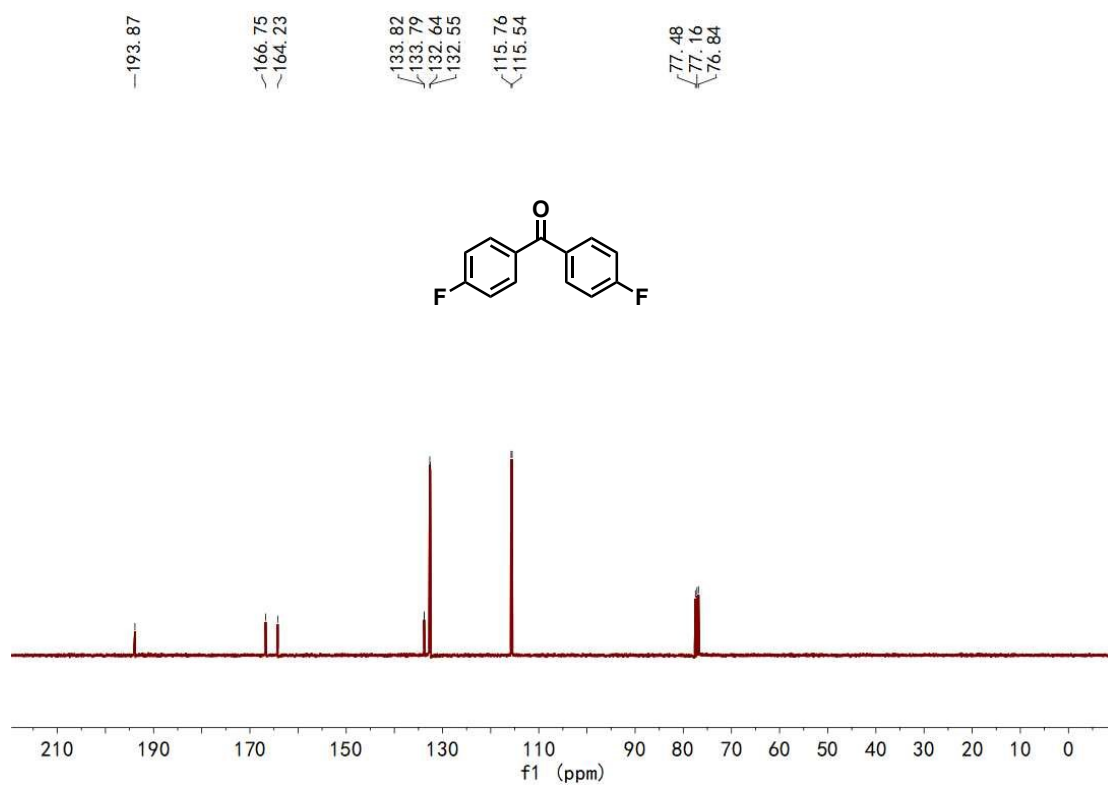

**Bis(4-fluorophenyl)methanone (2k):  $^{19}\text{F}$  NMR (376 MHz,  $\text{CDCl}_3$ )**

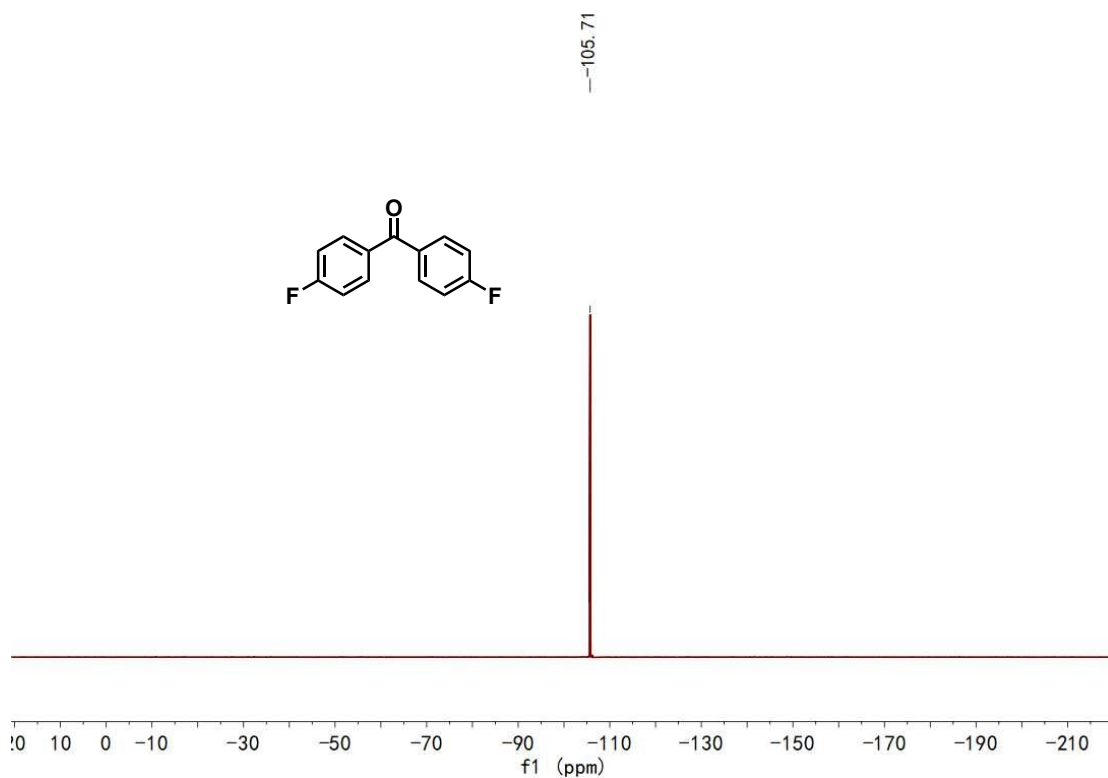

**Phenyl(pyridin-3-yl)methanone (2l):  $^1\text{H}$  NMR (400 MHz,  $\text{CDCl}_3$ )**

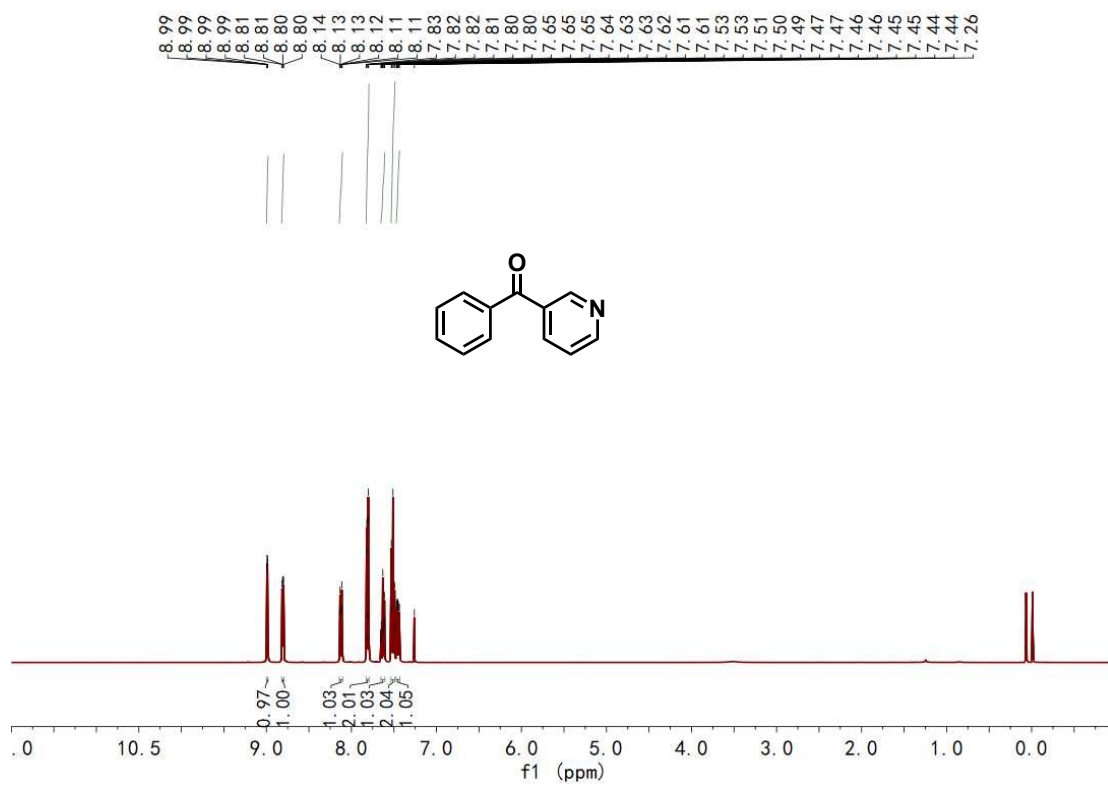

Phenyl(pyridin-3-yl)methanone (2l):  $^{13}\text{C}\{^1\text{H}\}$  NMR (101 MHz,  $\text{CDCl}_3$ )

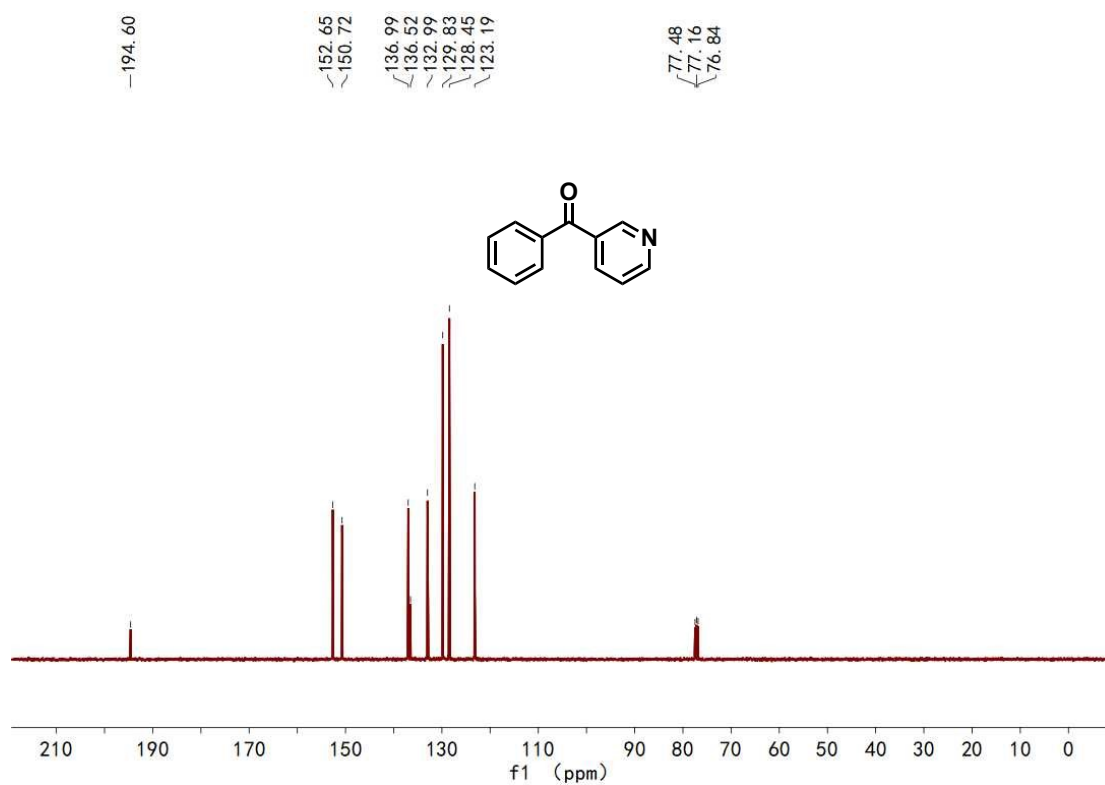

Phenyl(thiophen-2-yl)methanone (2m):  $^1\text{H}$  NMR (400 MHz,  $\text{CDCl}_3$ )

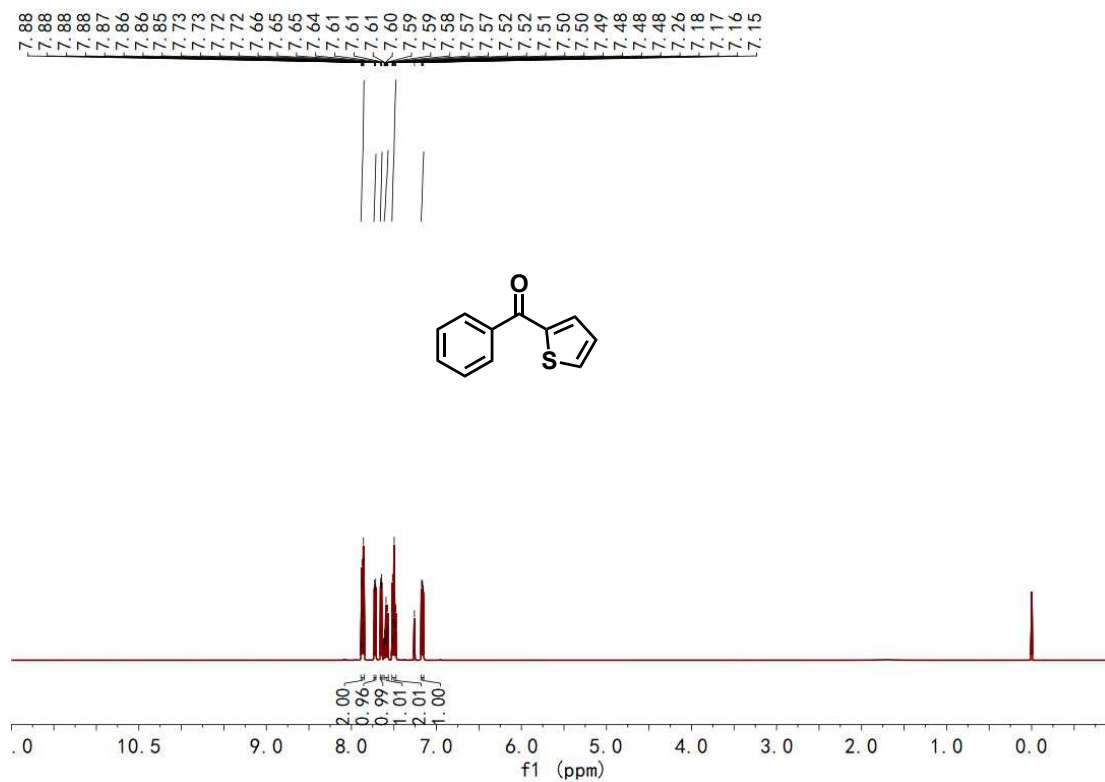

Phenyl(thiophen-2-yl)methanone (2m):  $^{13}\text{C}\{^1\text{H}\}$  NMR (101 MHz,  $\text{CDCl}_3$ )

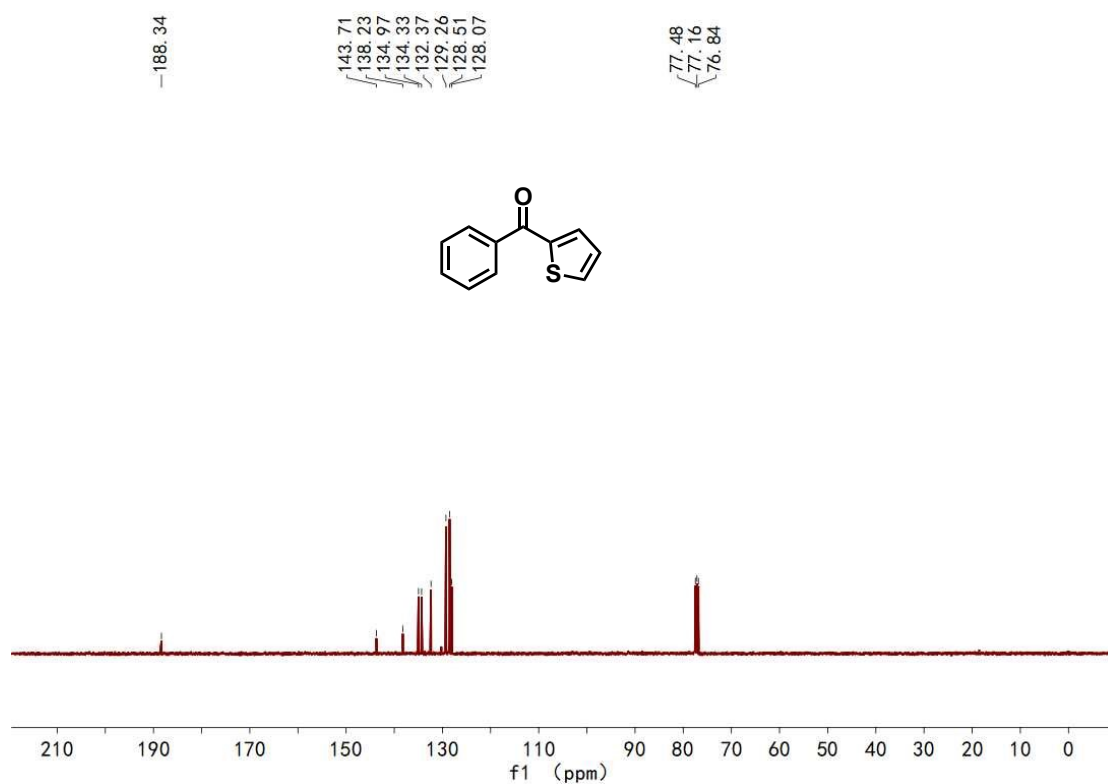

Acetophenone (2n, 6j):  $^1\text{H}$  NMR (400 MHz,  $\text{CDCl}_3$ )

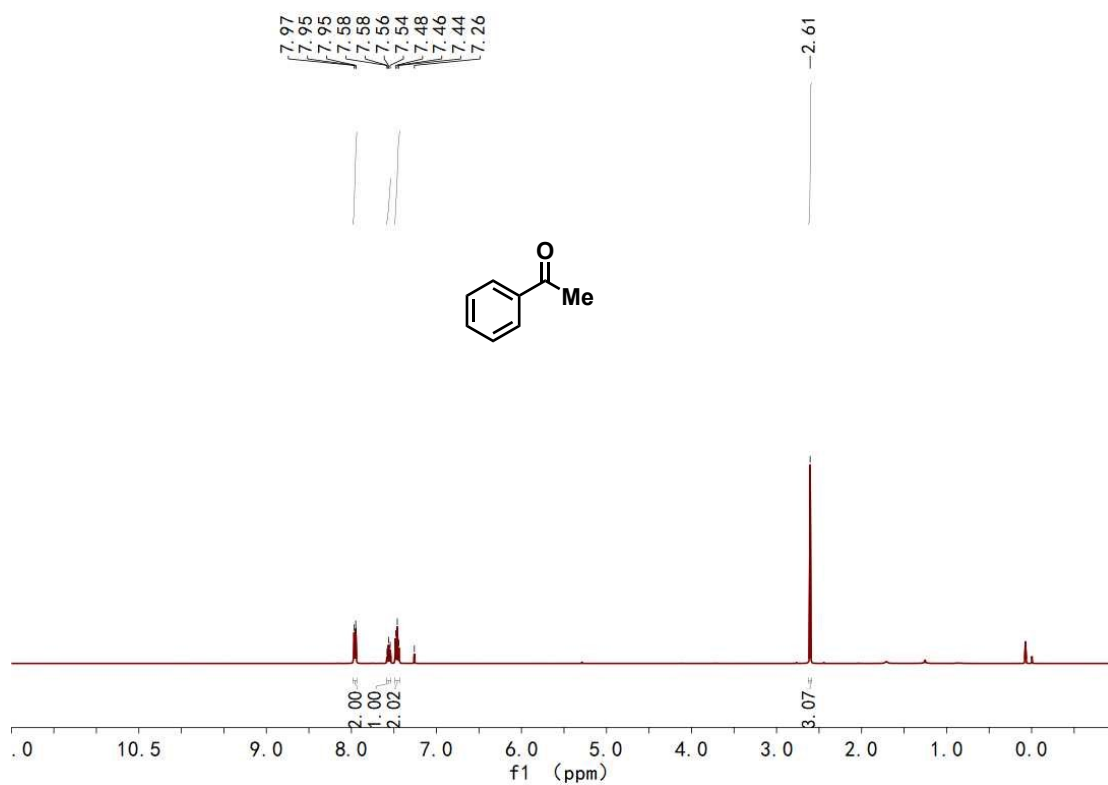

Acetophenone (2n, 6j):  $^{13}\text{C}\{^1\text{H}\}$  NMR (101 MHz,  $\text{CDCl}_3$ )

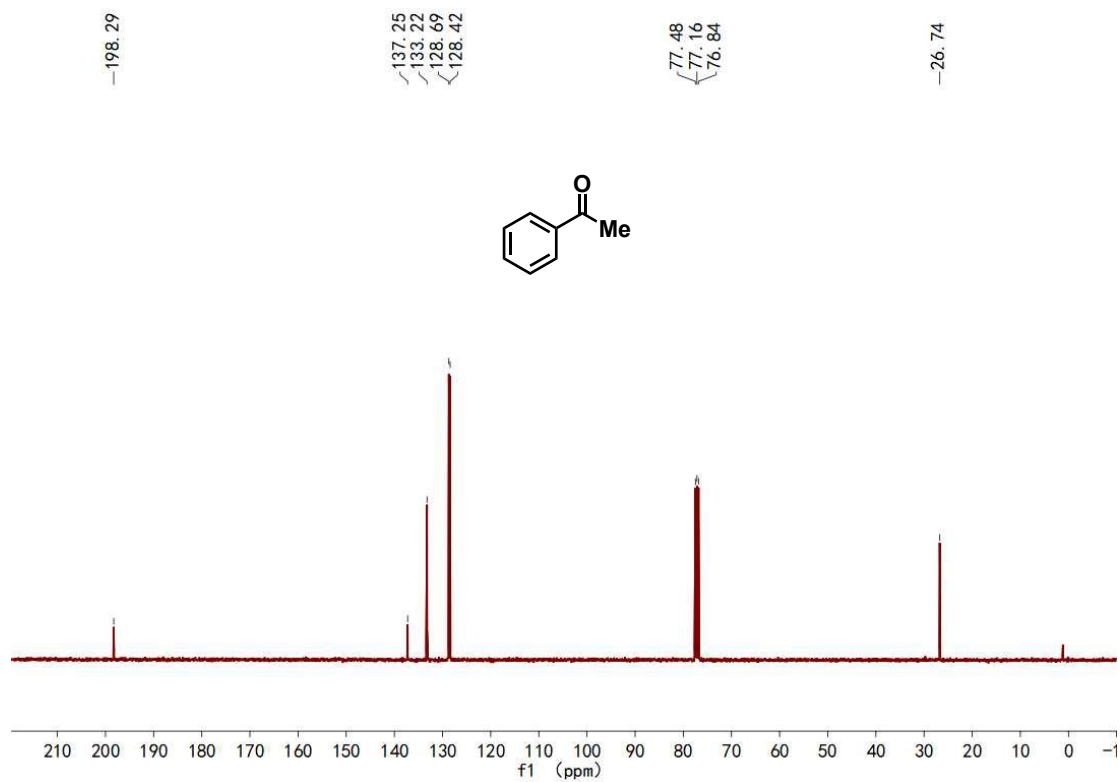

4-Acetylbenzonitrile (2o):  $^1\text{H}$  NMR (400 MHz,  $\text{CDCl}_3$ )

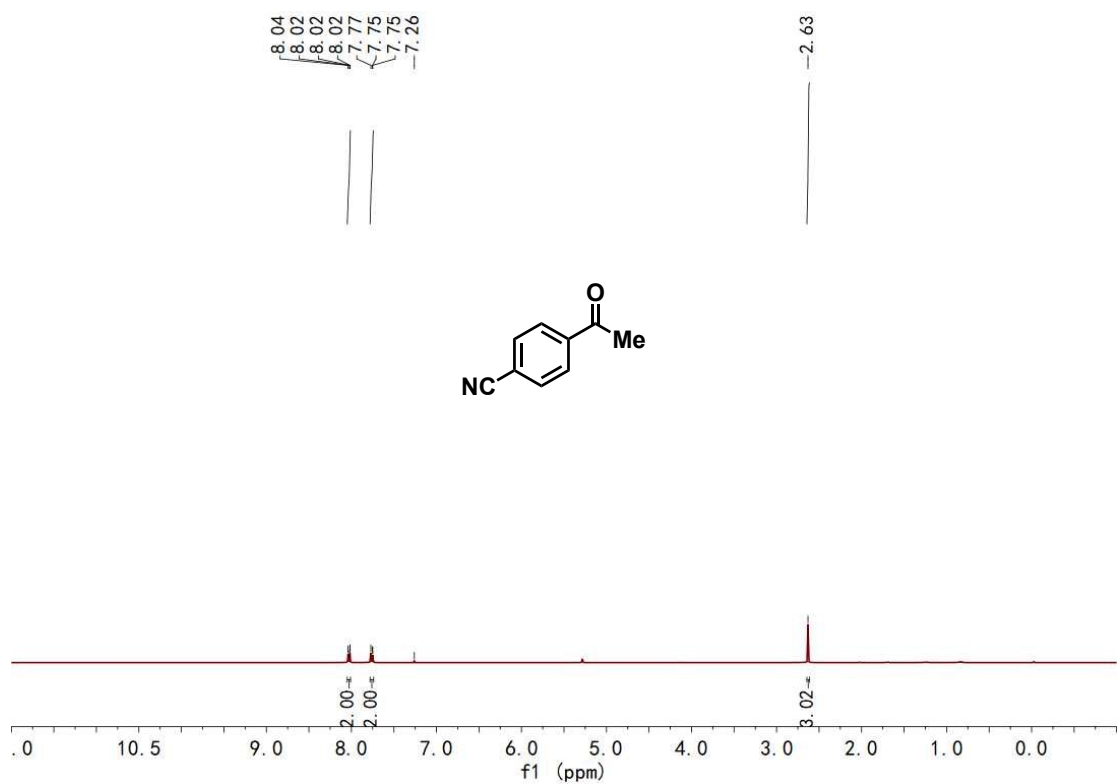

4-Acetylbenzotrile (2o):  $^{13}\text{C}\{^1\text{H}\}$  NMR (101 MHz,  $\text{CDCl}_3$ )

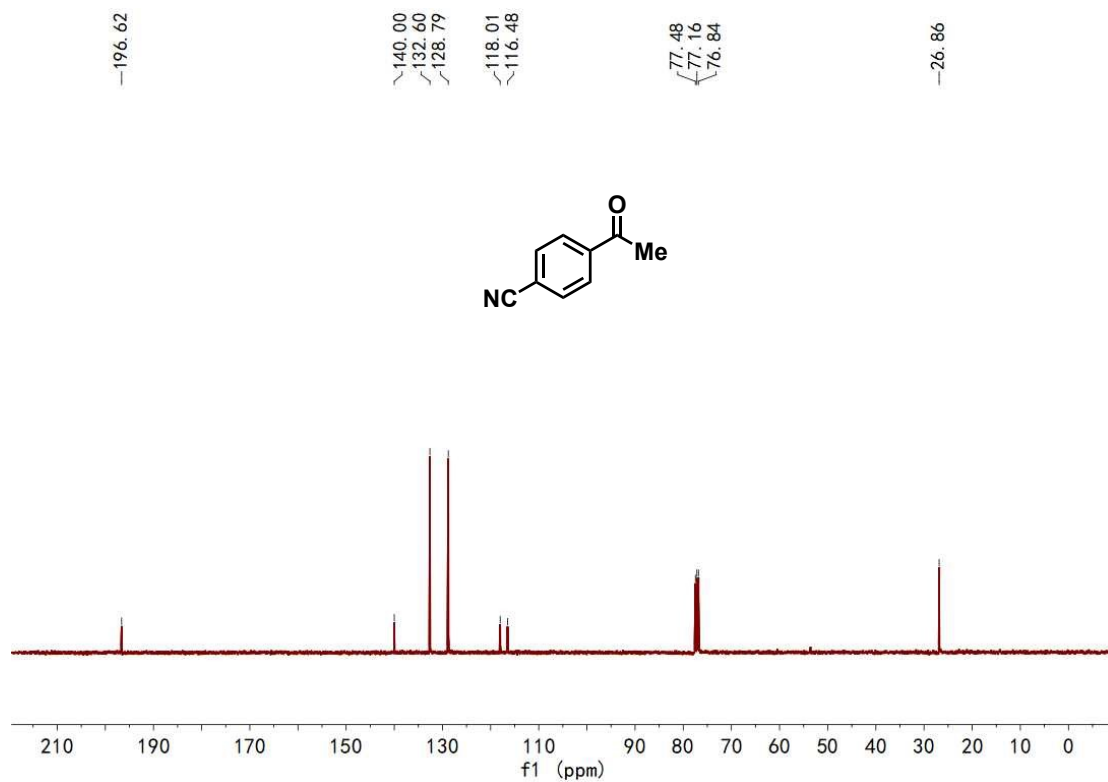

1-(4-Nitrophenyl)ethan-1-one (2p):  $^1\text{H}$  NMR (400 MHz,  $\text{CDCl}_3$ )

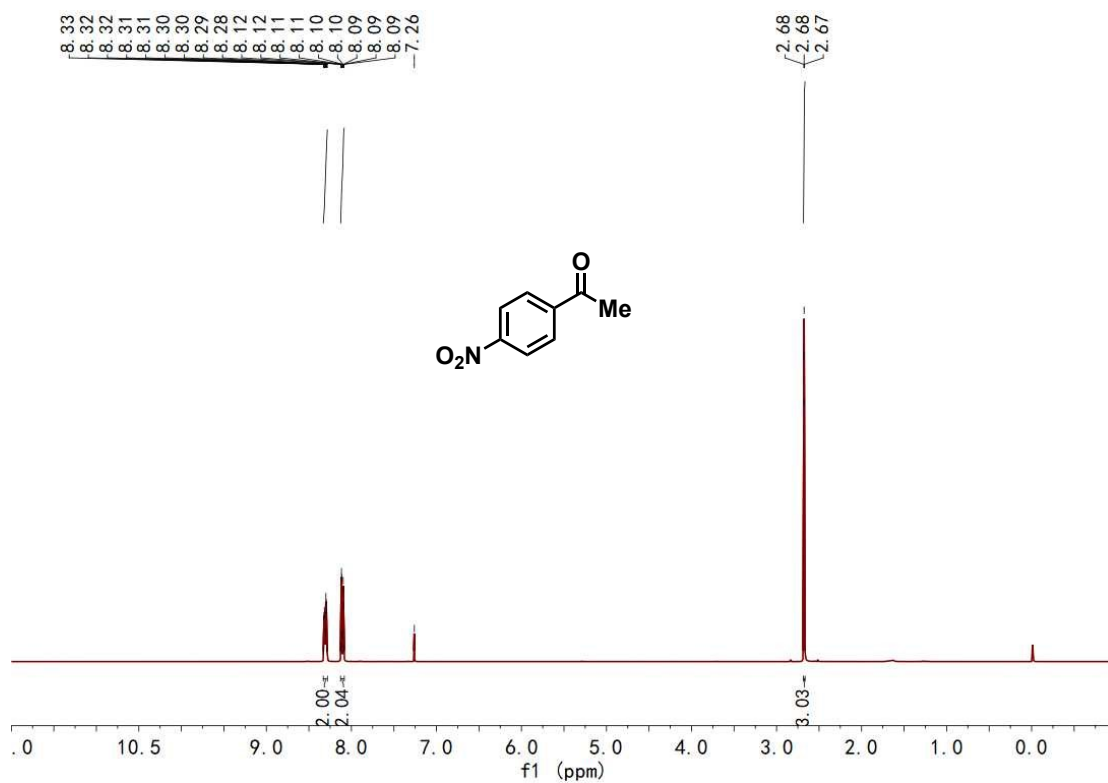

**1-(4-Nitrophenyl)ethan-1-one (2p):  $^{13}\text{C}\{^1\text{H}\}$  NMR (101 MHz,  $\text{CDCl}_3$ )**

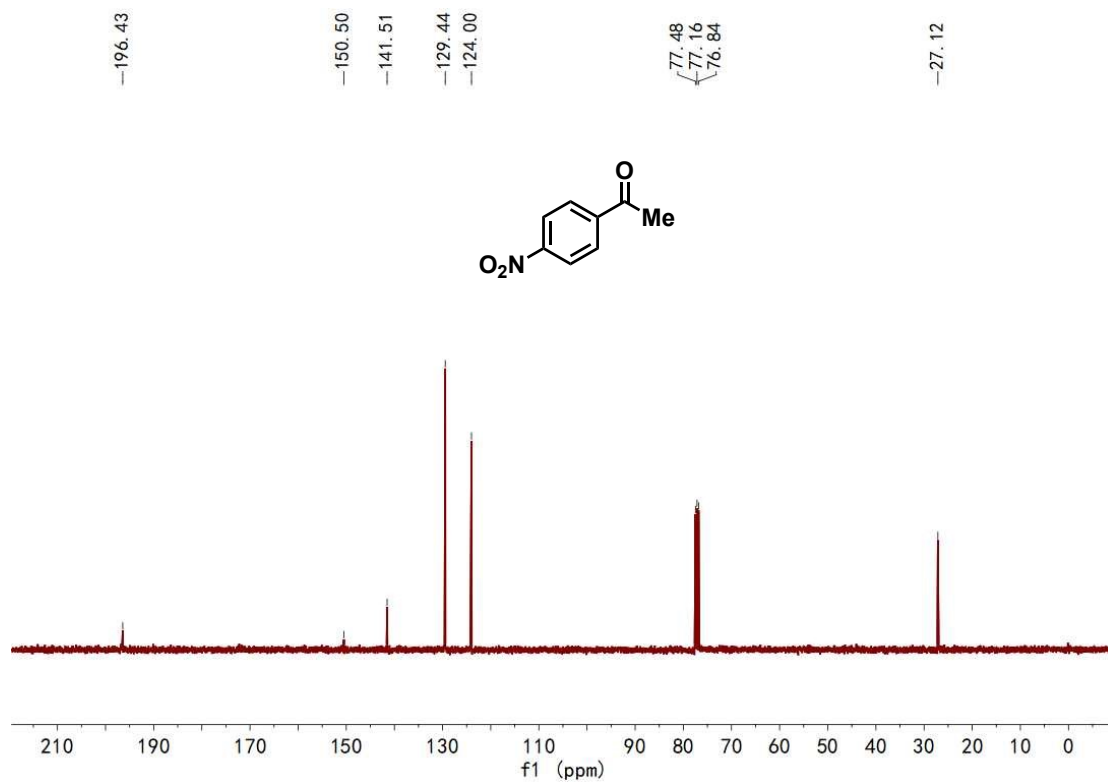

**1-(Thiophen-2-yl)ethan-1-one (2q):  $^1\text{H}$  NMR (400 MHz,  $\text{CDCl}_3$ )**

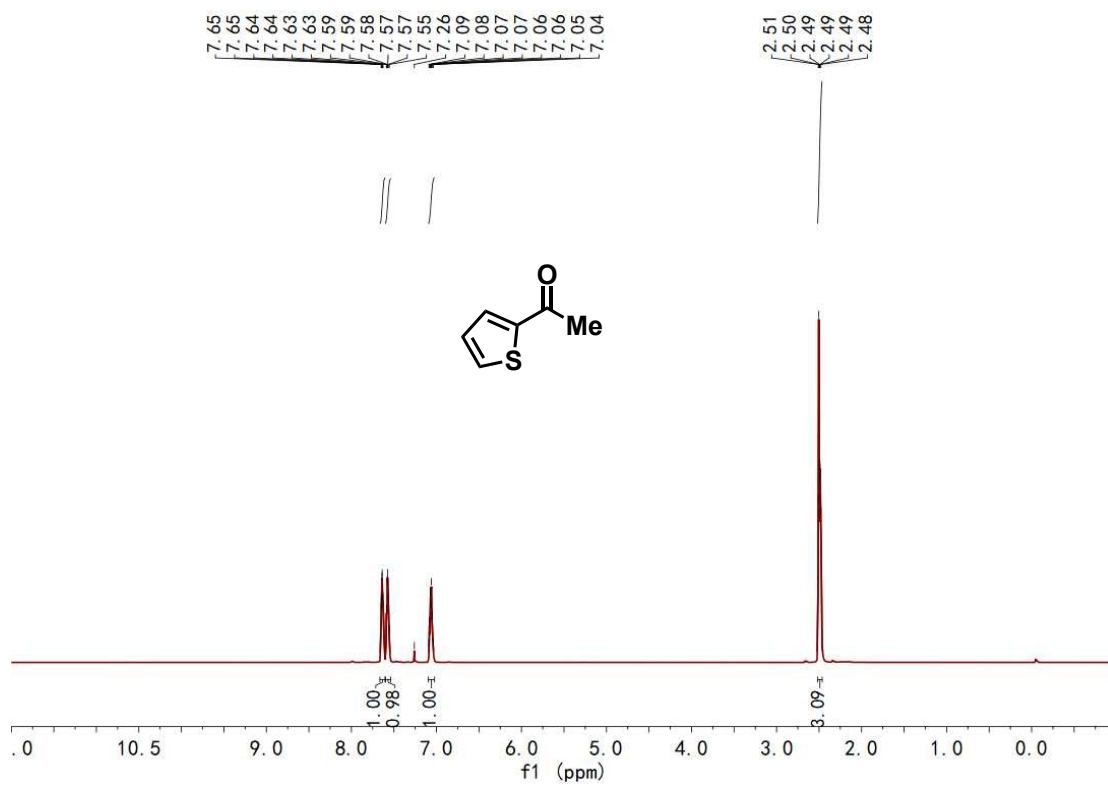

1-(Thiophen-2-yl)ethan-1-one (2q):  $^{13}\text{C}\{^1\text{H}\}$  NMR (101 MHz,  $\text{CDCl}_3$ )

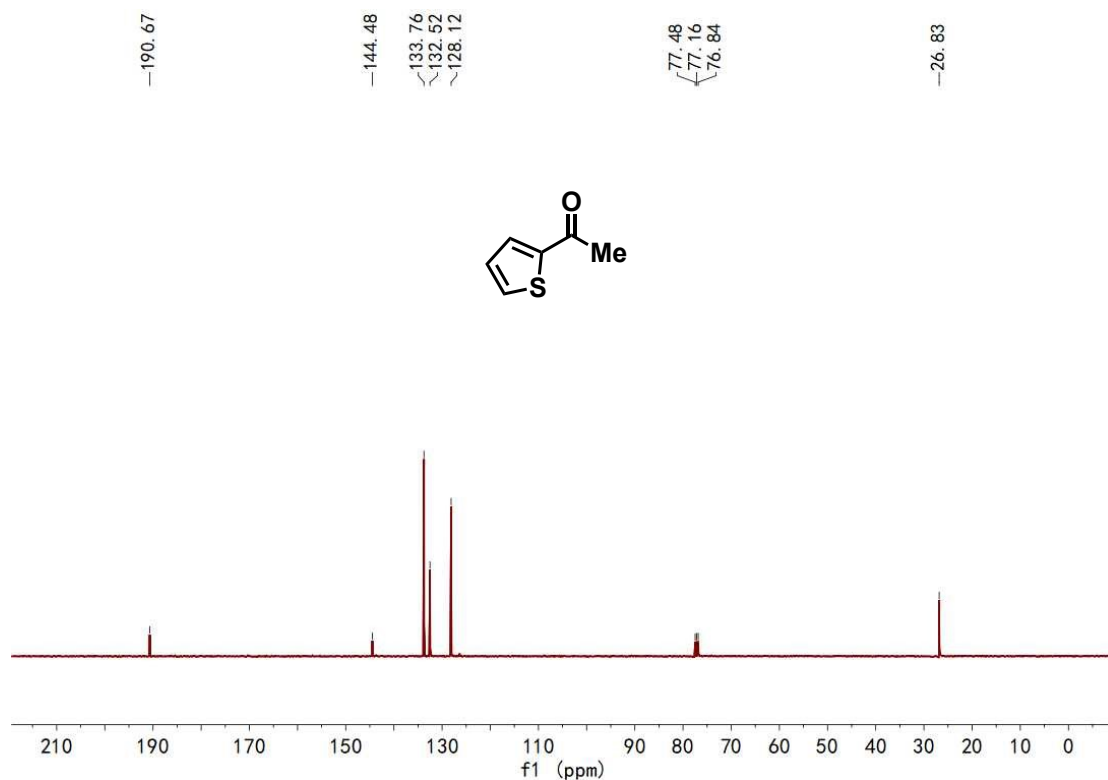

Cyclopentyl(phenyl)methanone (2r):  $^1\text{H}$  NMR (400 MHz,  $\text{CDCl}_3$ )

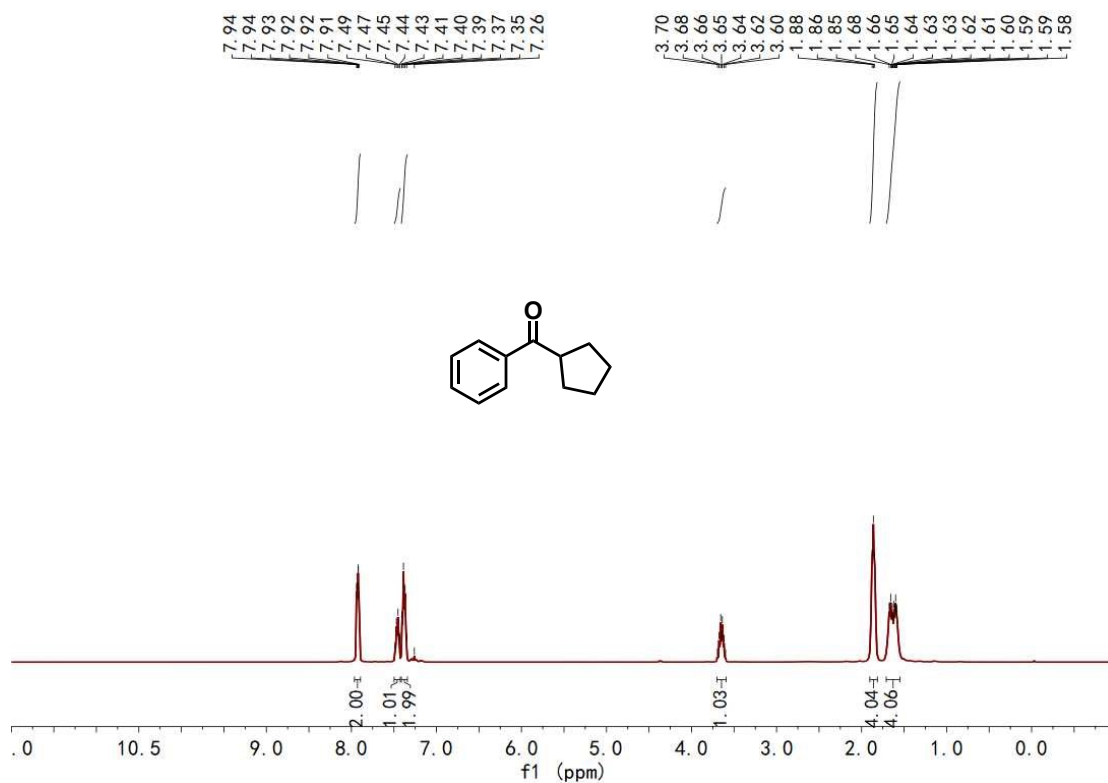

Cyclopentyl(phenyl)methanone (2r):  $^{13}\text{C}\{^1\text{H}\}$  NMR (101 MHz,  $\text{CDCl}_3$ )

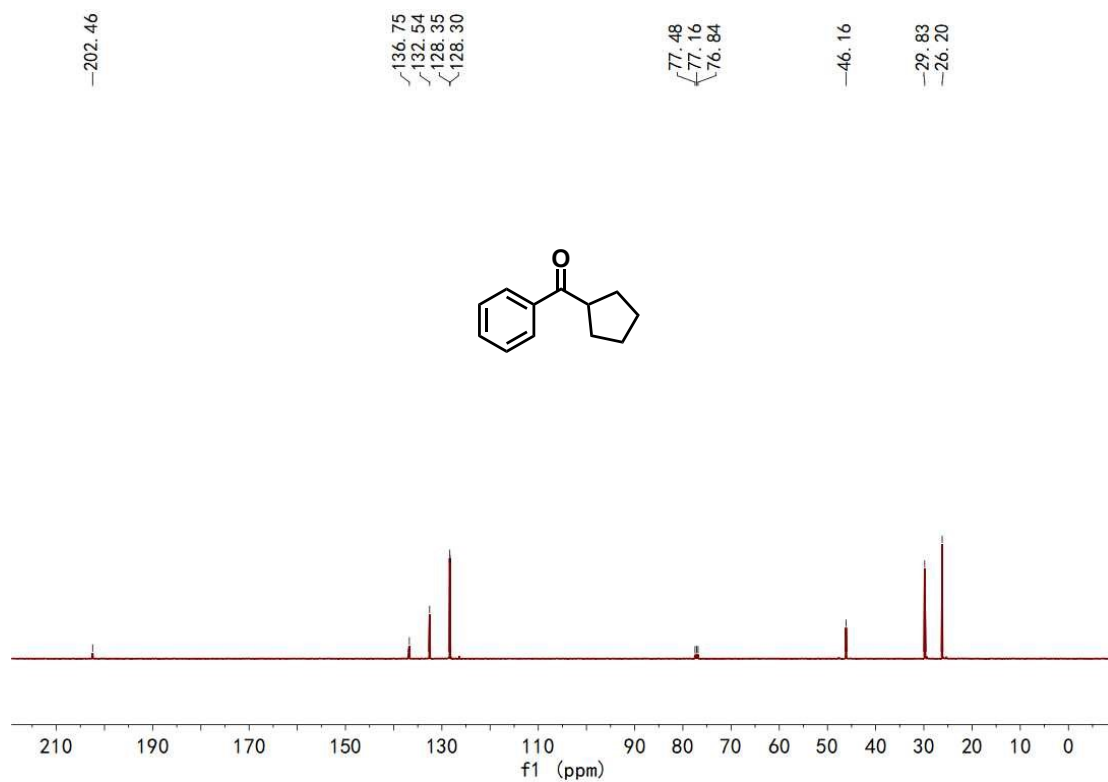

9H-thioxanthen-9-one (2s):  $^1\text{H}$  NMR (400 MHz,  $\text{CDCl}_3$ )

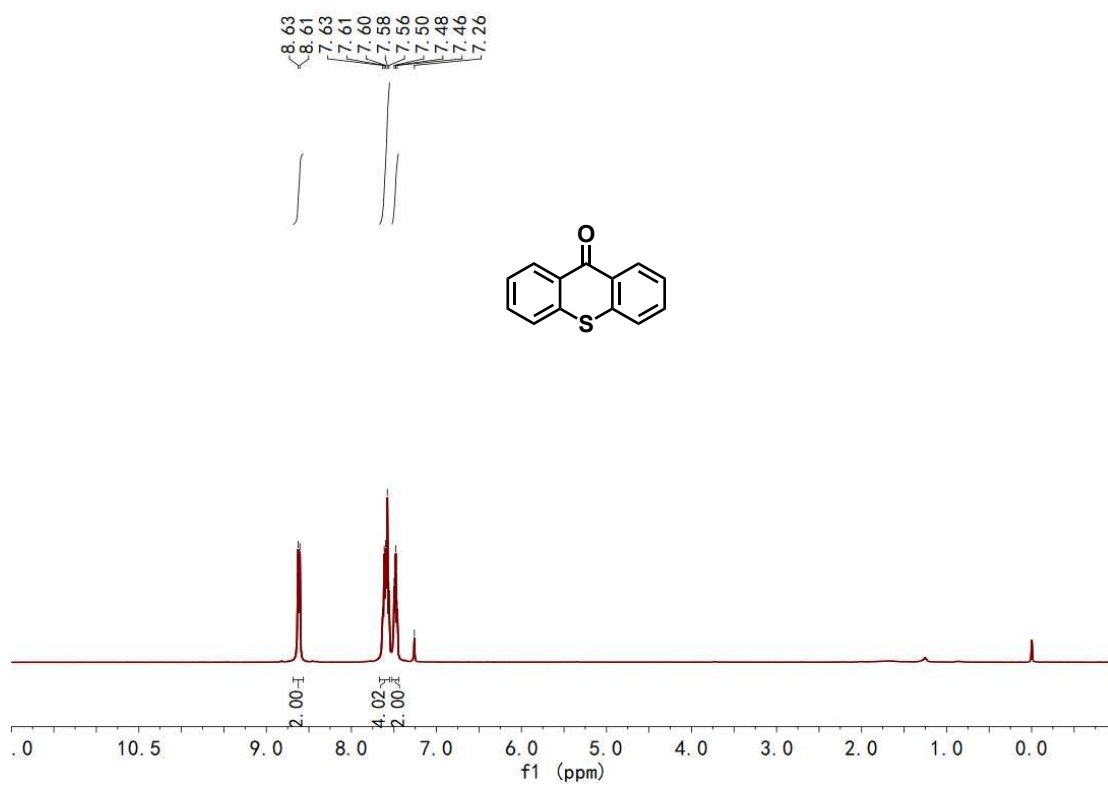

**9H-thioxanthen-9-one (2s):  $^{13}\text{C}\{^1\text{H}\}$  NMR (101 MHz,  $\text{CDCl}_3$ )**

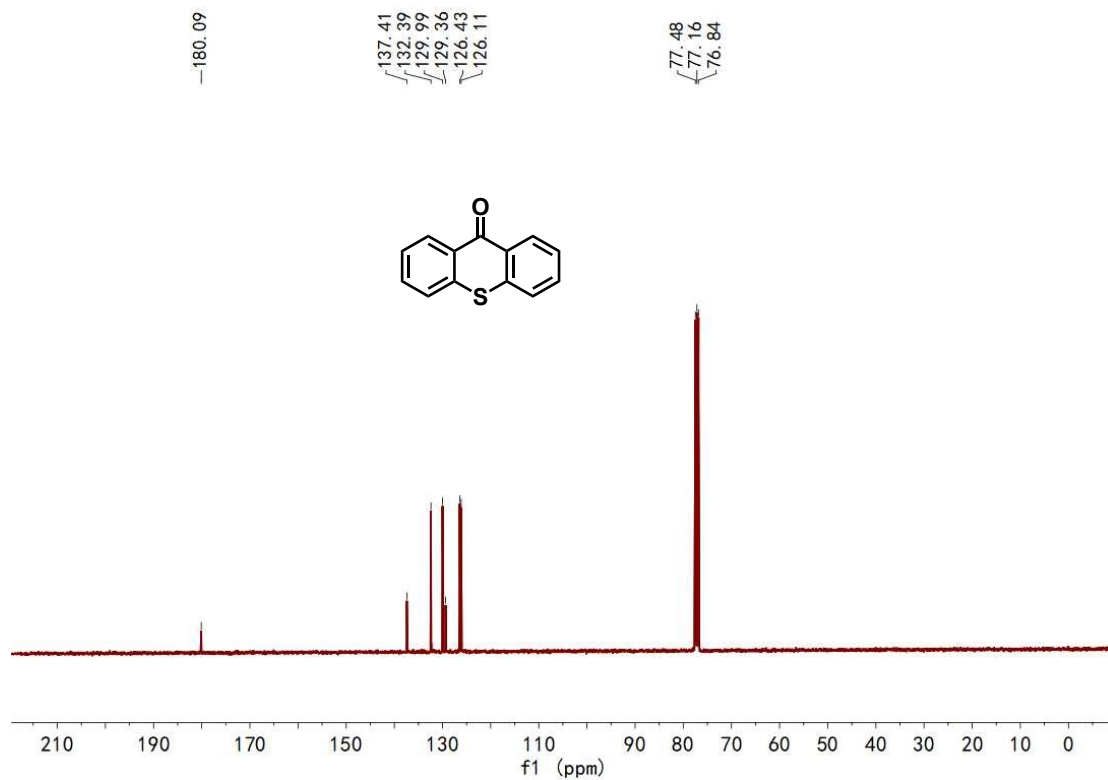

**1,2-Bis(4-methoxyphenyl)ethane-1,2-dione (2t):  $^1\text{H}$  NMR (400 MHz,  $\text{CDCl}_3$ )**

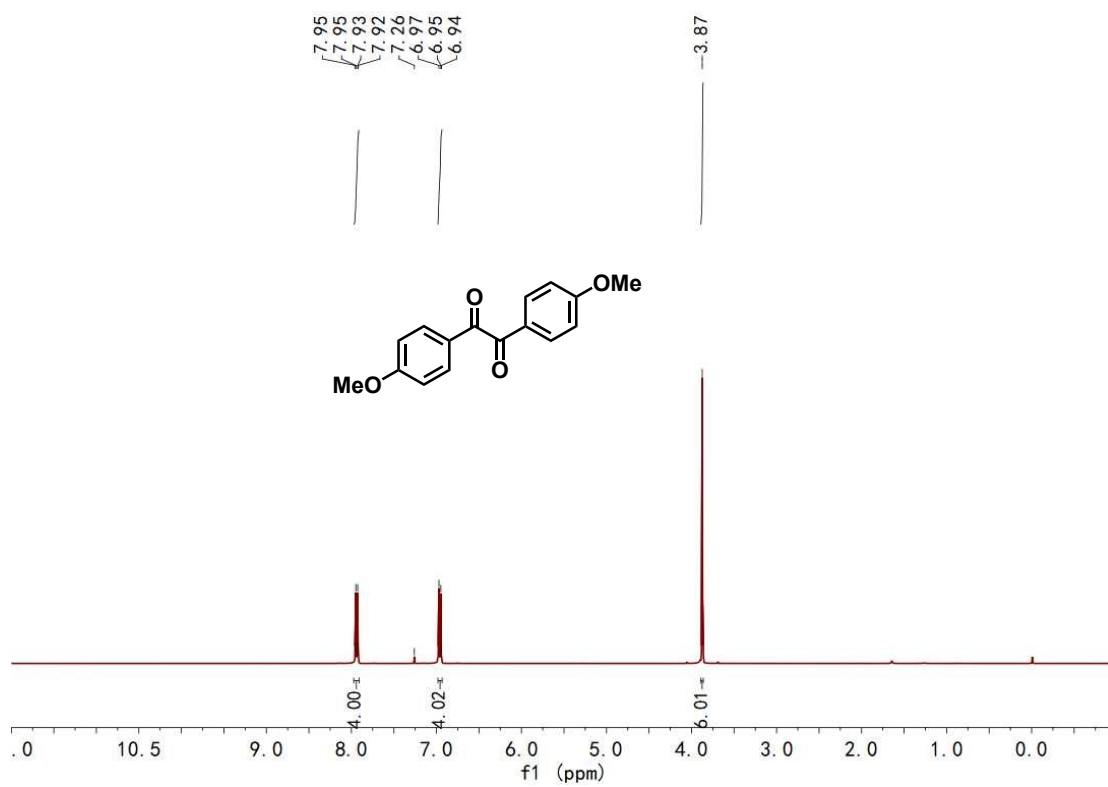

1,2-Bis(4-methoxyphenyl)ethane-1,2-dione (2t):  $^{13}\text{C}\{^1\text{H}\}$  NMR (101 MHz,  $\text{CDCl}_3$ )

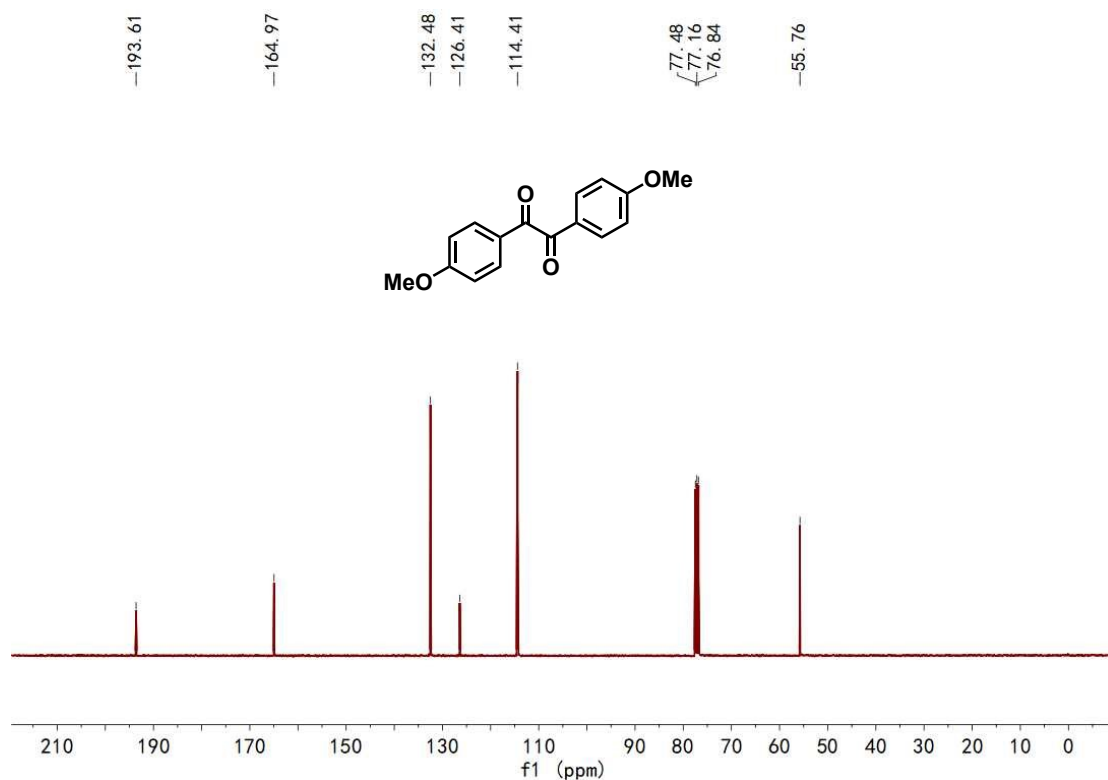

Methyl 4-([1,1'-biphenyl]-4-yl)-4-oxobutanoate (2u):  $^1\text{H}$  NMR (400 MHz,  $\text{CDCl}_3$ )

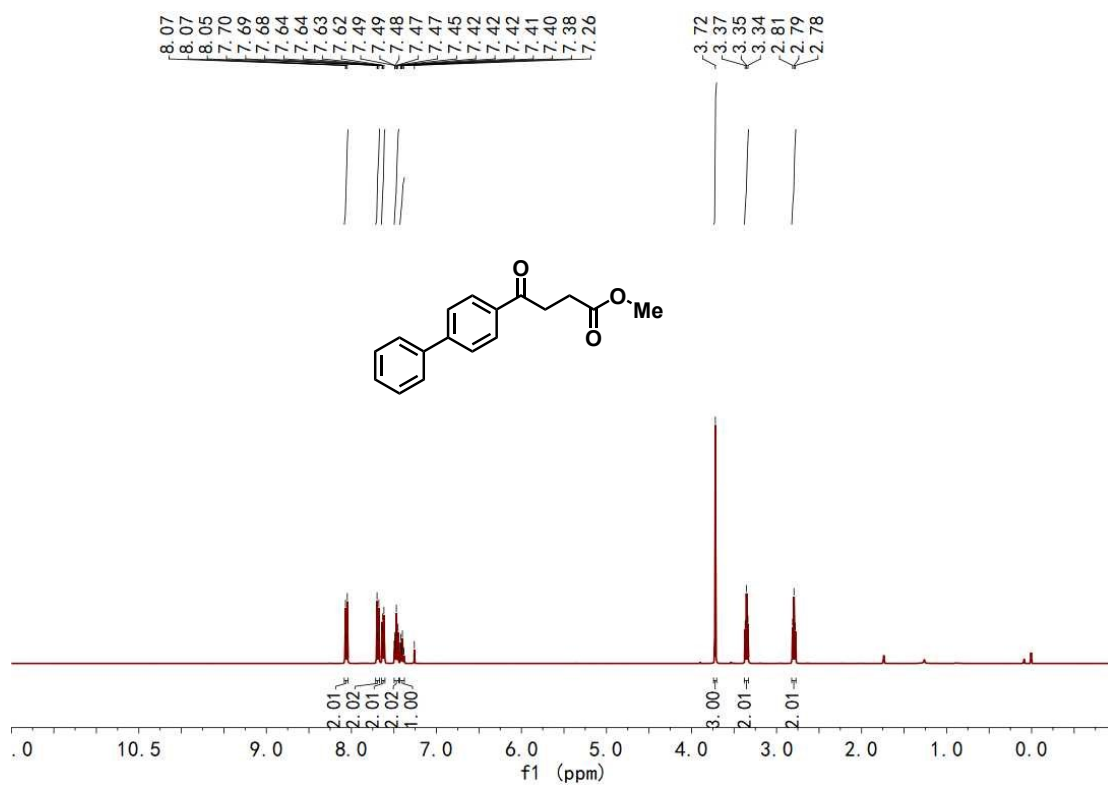

**Methyl 4-([1,1'-biphenyl]-4-yl)-4-oxobutanoate (2u):  $^{13}\text{C}\{^1\text{H}\}$  NMR (101 MHz,  $\text{CDCl}_3$ )**

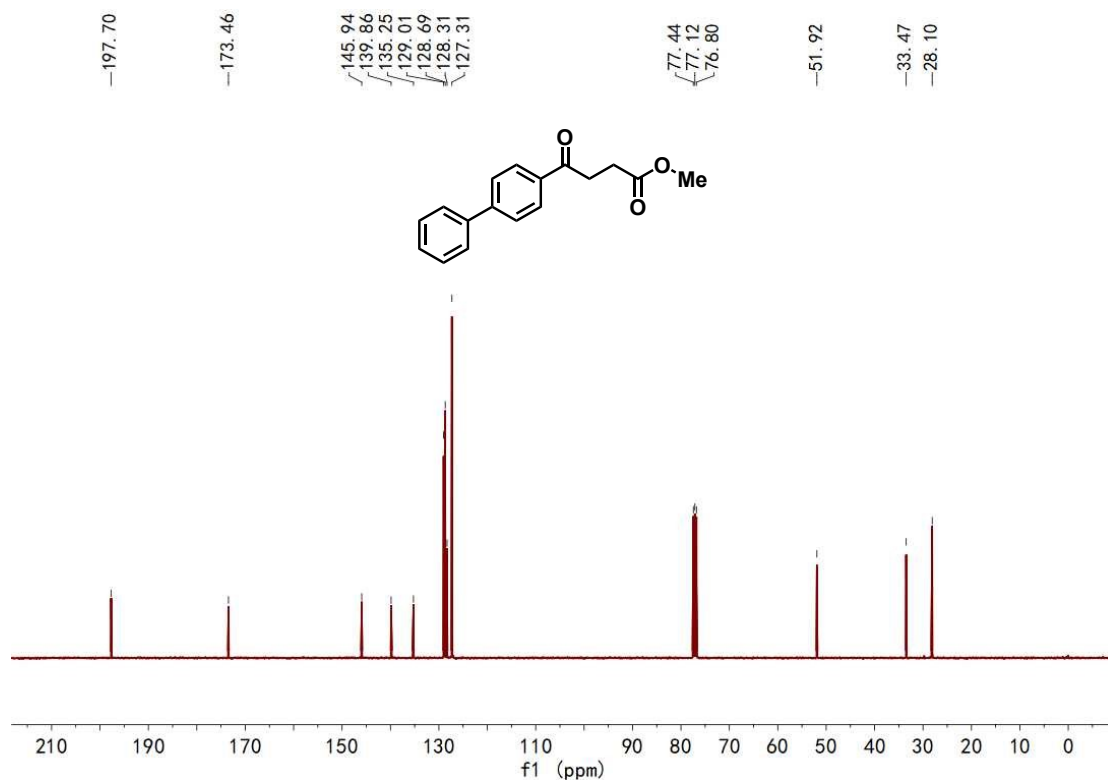

**Ethyl 3-oxo-3-phenylpropanoate (2v):  $^1\text{H}$  NMR (400 MHz,  $\text{CDCl}_3$ )**

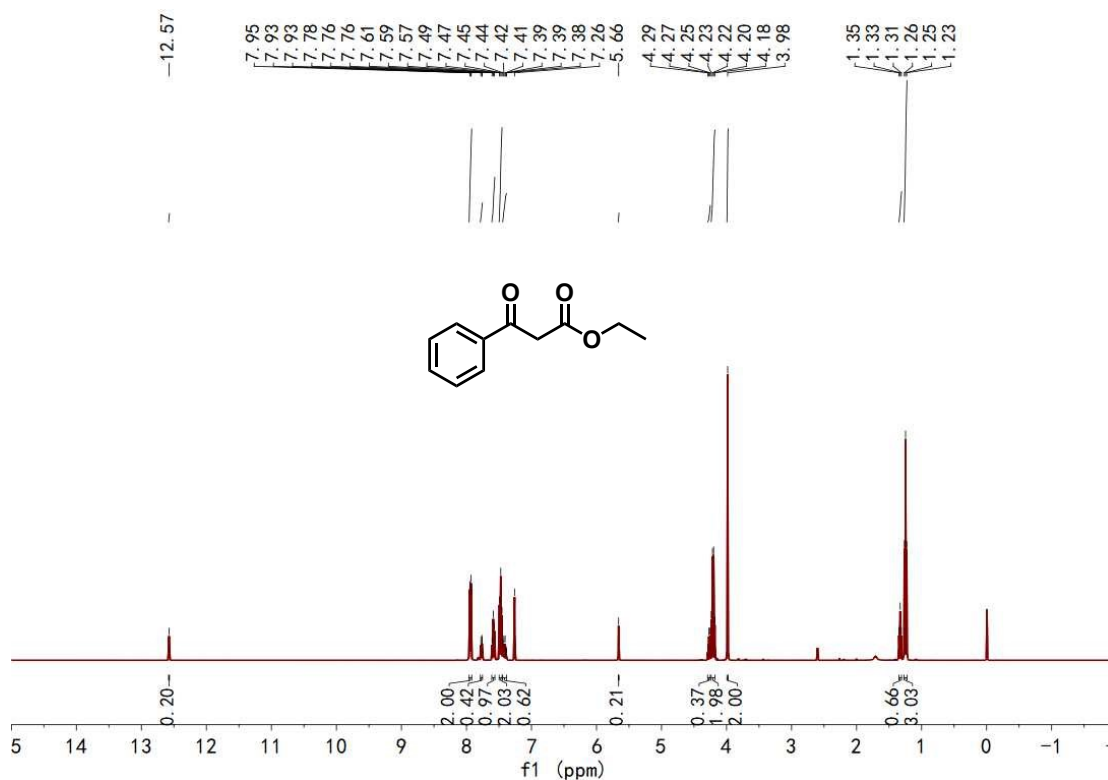

**Ethyl 3-oxo-3-phenylpropanoate (2v):  $^{13}\text{C}\{^1\text{H}\}$  NMR (101 MHz,  $\text{CDCl}_3$ )**

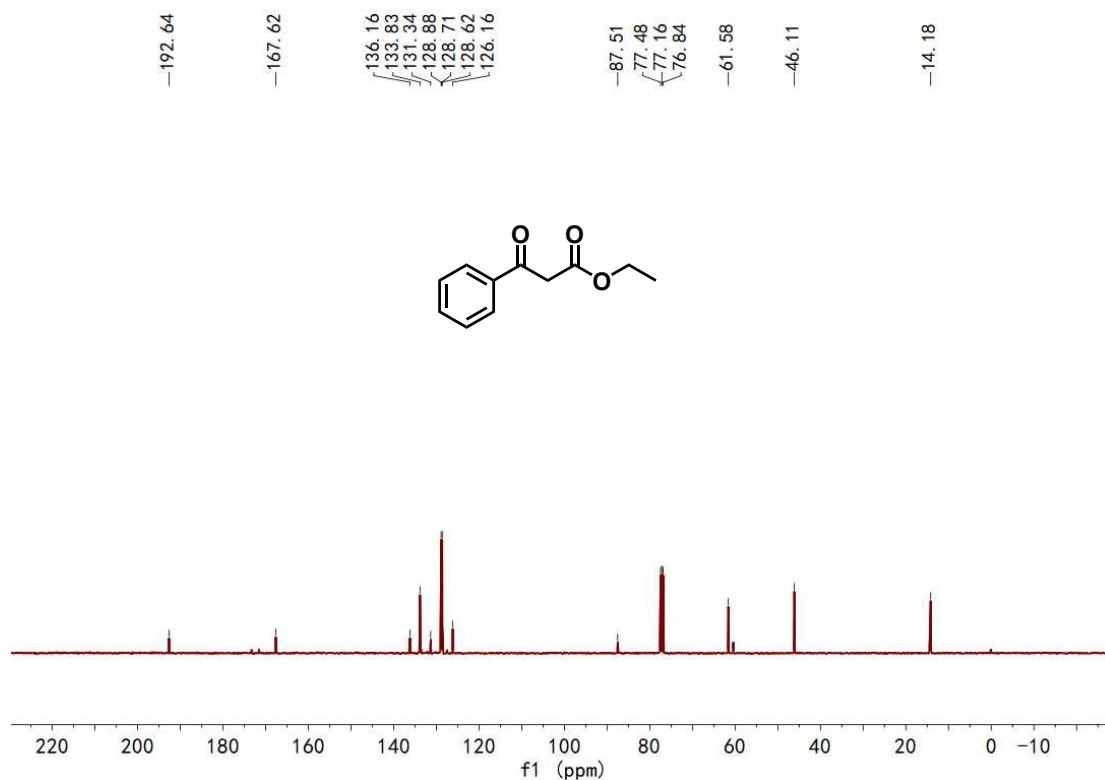

**Benzaldehyde (4a):  $^1\text{H}$  NMR (400 MHz,  $\text{CDCl}_3$ )**

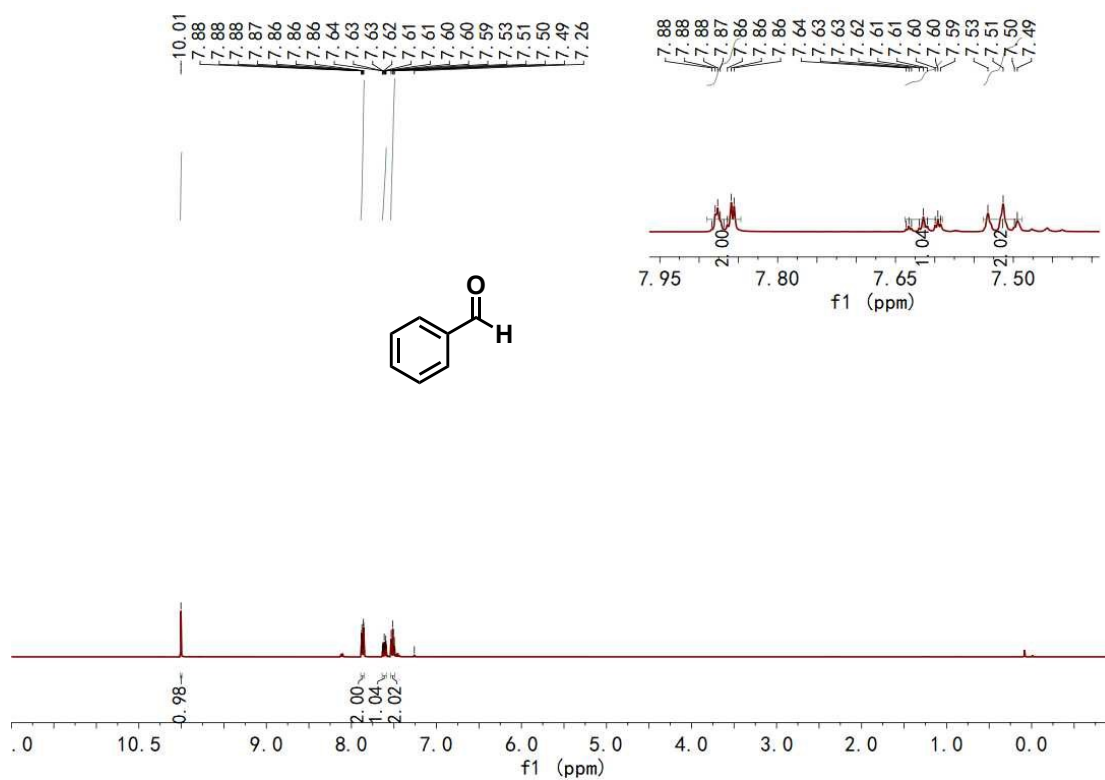

**4-Methylbenzaldehyde (4b):  $^1\text{H}$  NMR (400 MHz,  $\text{CDCl}_3$ )**

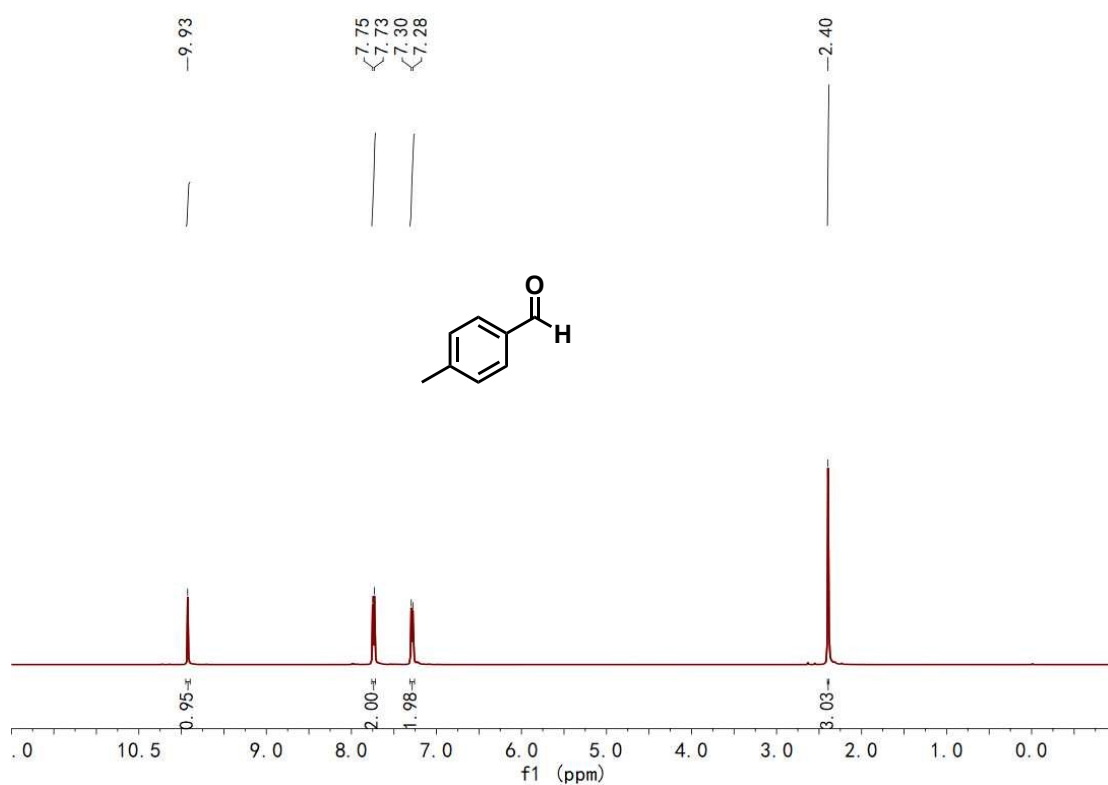

**4-Methylbenzaldehyde (4b):  $^{13}\text{C}\{^1\text{H}\}$  NMR (101 MHz,  $\text{CDCl}_3$ )**

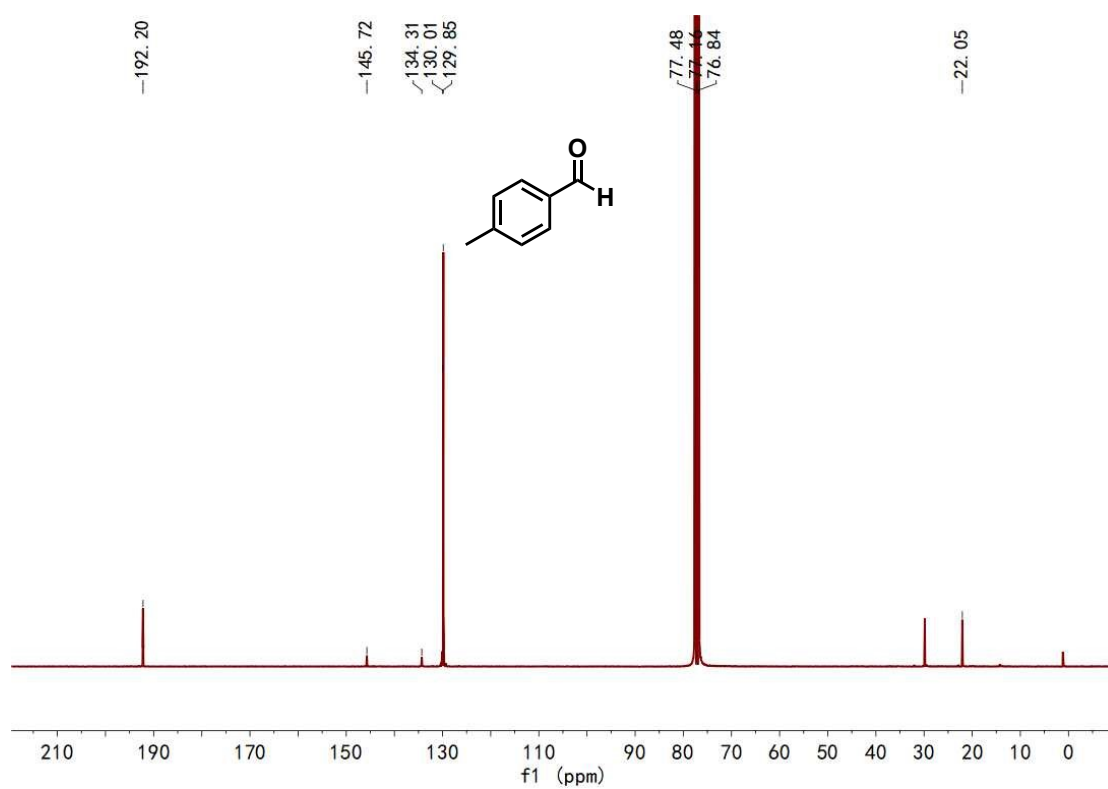

2-Methylbenzaldehyde (4c):  $^1\text{H}$  NMR (400 MHz,  $\text{CDCl}_3$ )

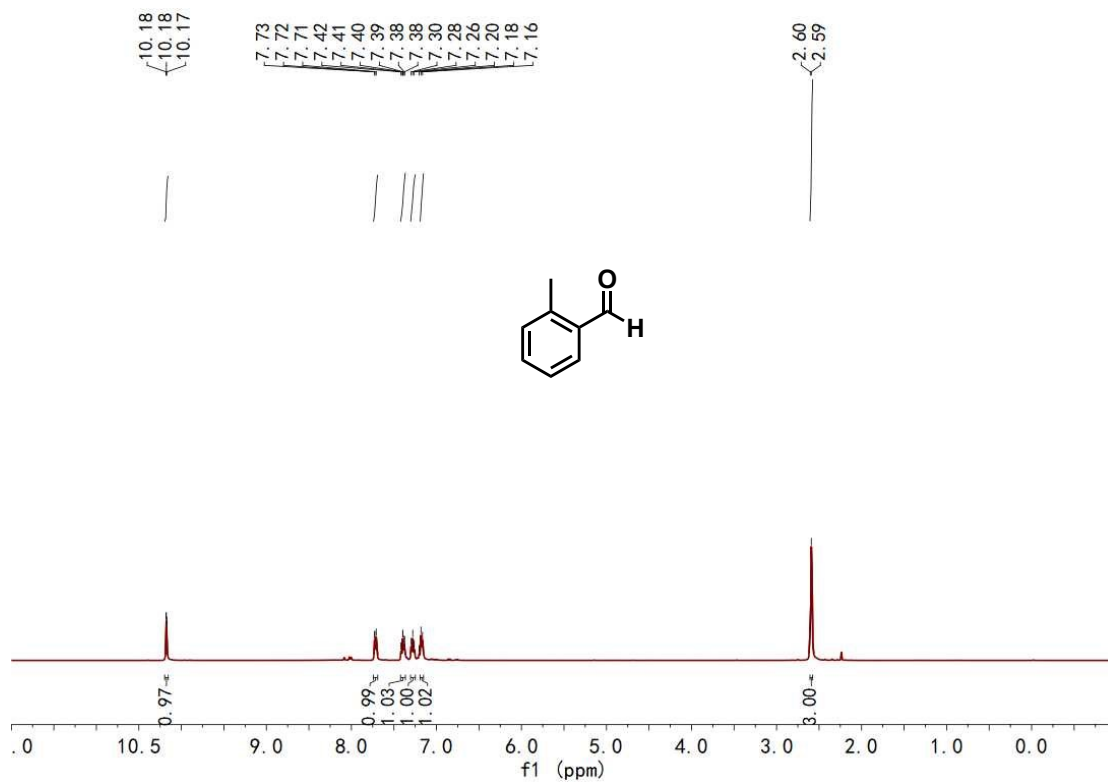

2-Methylbenzaldehyde (4c):  $^{13}\text{C}\{^1\text{H}\}$  NMR (101 MHz,  $\text{CDCl}_3$ )

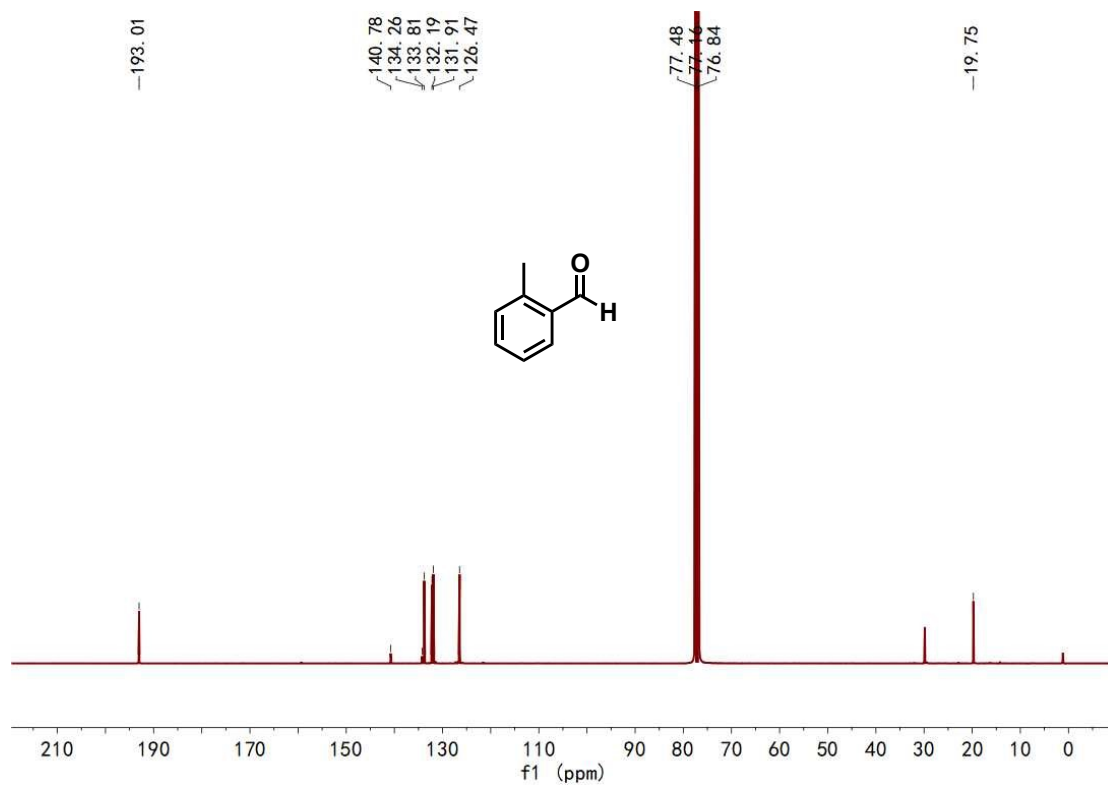

**3,5-Dimethylbenzaldehyde (4d):  $^1\text{H}$  NMR (400 MHz,  $\text{CDCl}_3$ )**

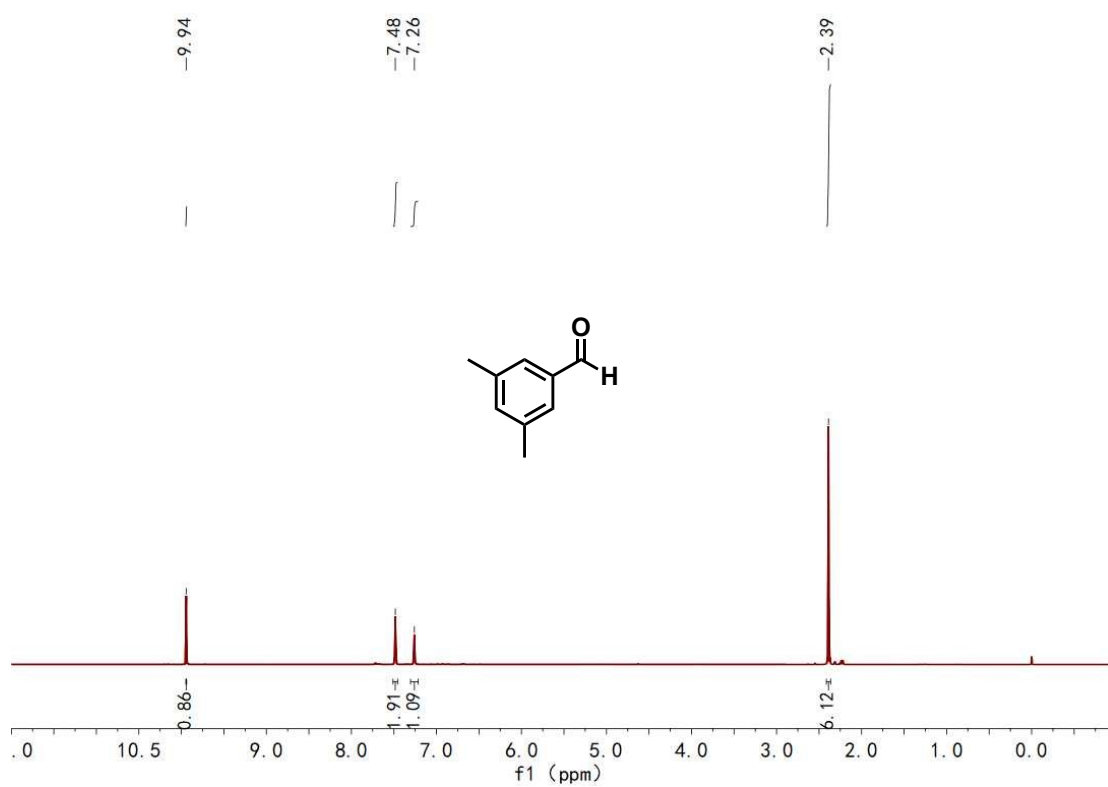

**3,5-Dimethylbenzaldehyde (4d):  $^{13}\text{C}\{^1\text{H}\}$  NMR (101 MHz,  $\text{CDCl}_3$ )**

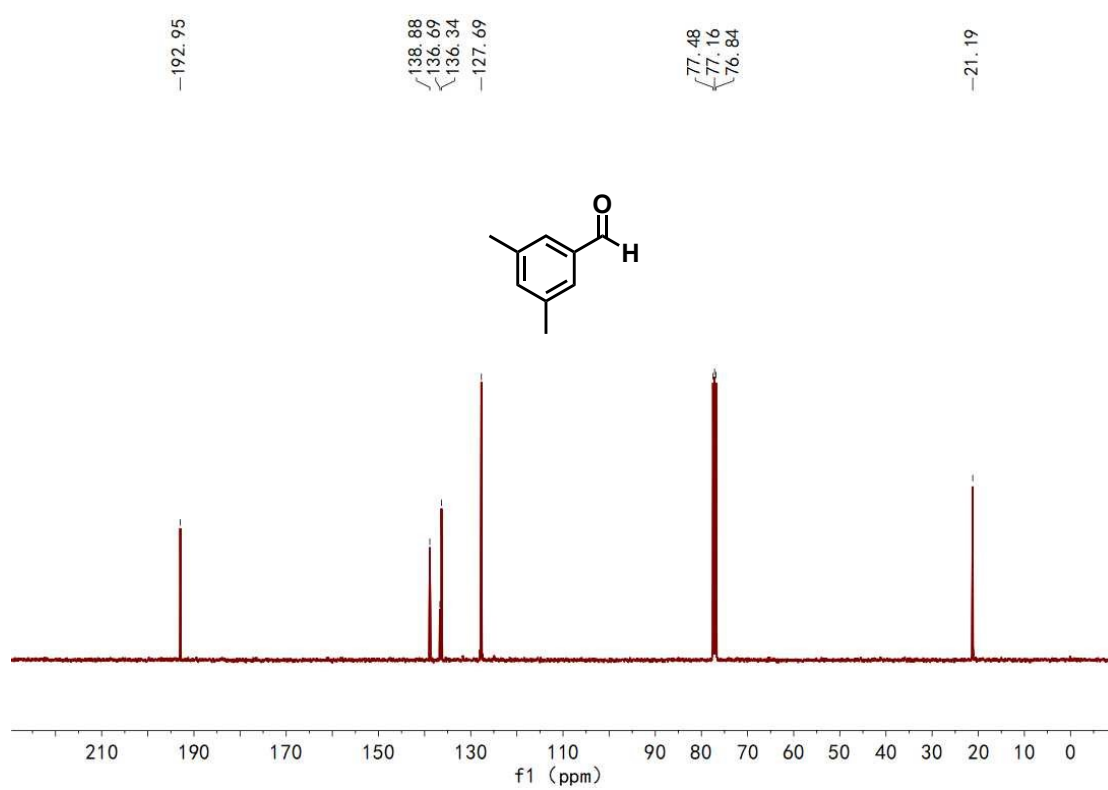

**4-Isopropylbenzaldehyde (4e):  $^1\text{H}$  NMR (400 MHz,  $\text{CDCl}_3$ )**

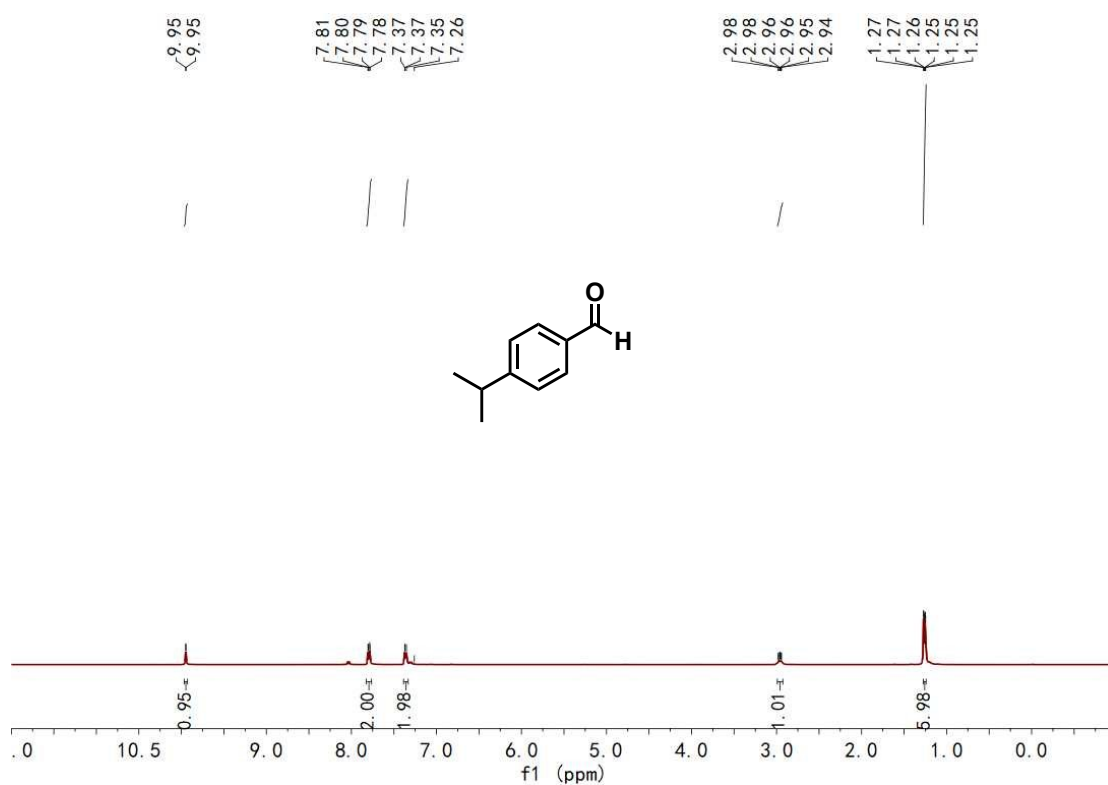

**4-Isopropylbenzaldehyde (4e):  $^{13}\text{C}\{^1\text{H}\}$  NMR (101 MHz,  $\text{CDCl}_3$ )**

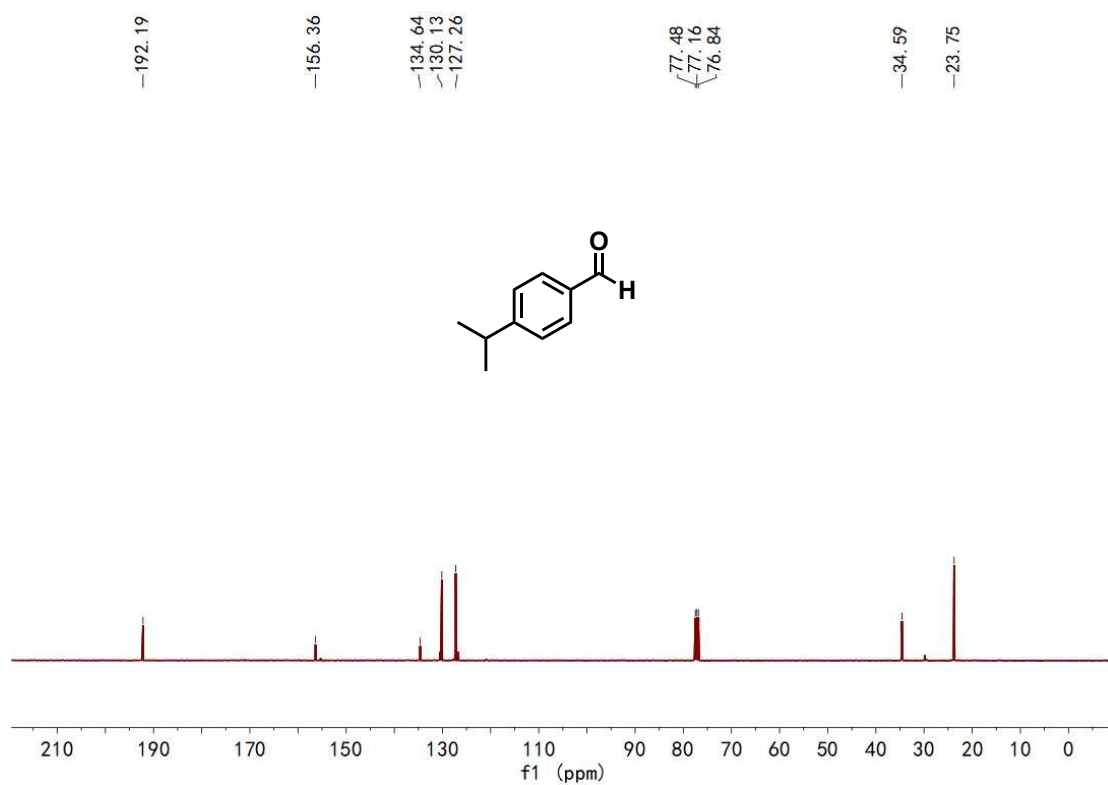

4-(*Tert*-butyl)benzaldehyde (4f):  $^1\text{H}$  NMR (400 MHz,  $\text{CDCl}_3$ )

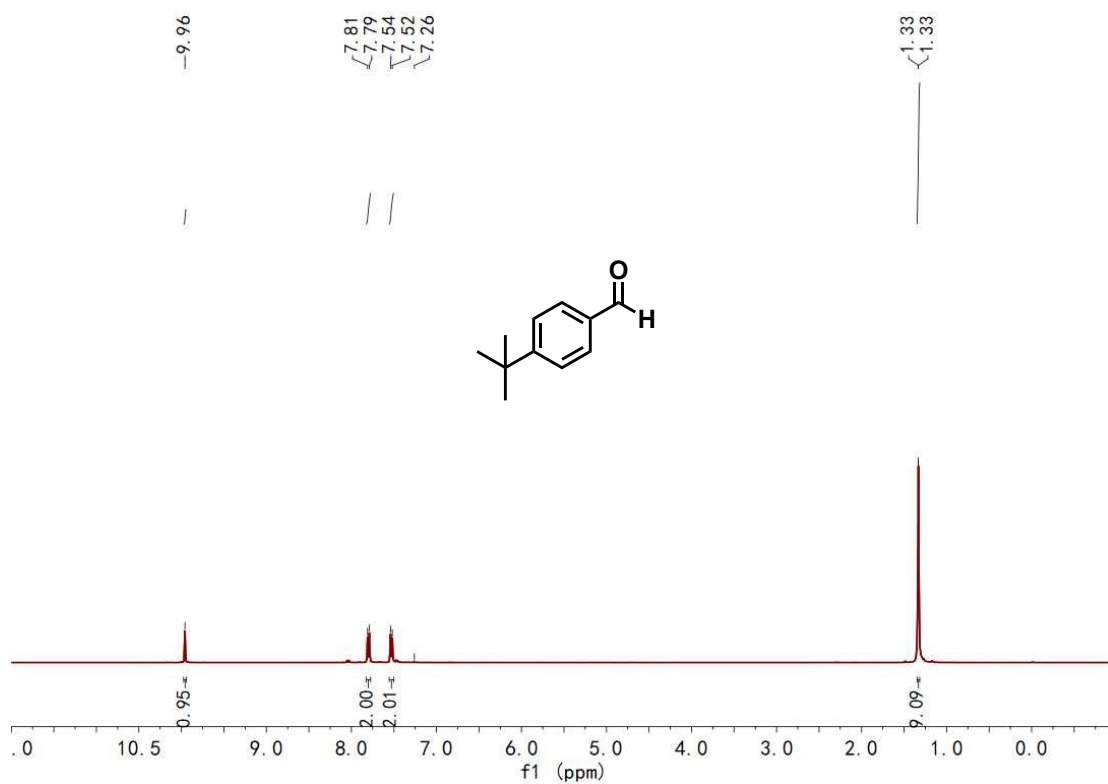

4-(*Tert*-butyl)benzaldehyde (4f):  $^{13}\text{C}\{^1\text{H}\}$  NMR (101 MHz,  $\text{CDCl}_3$ )

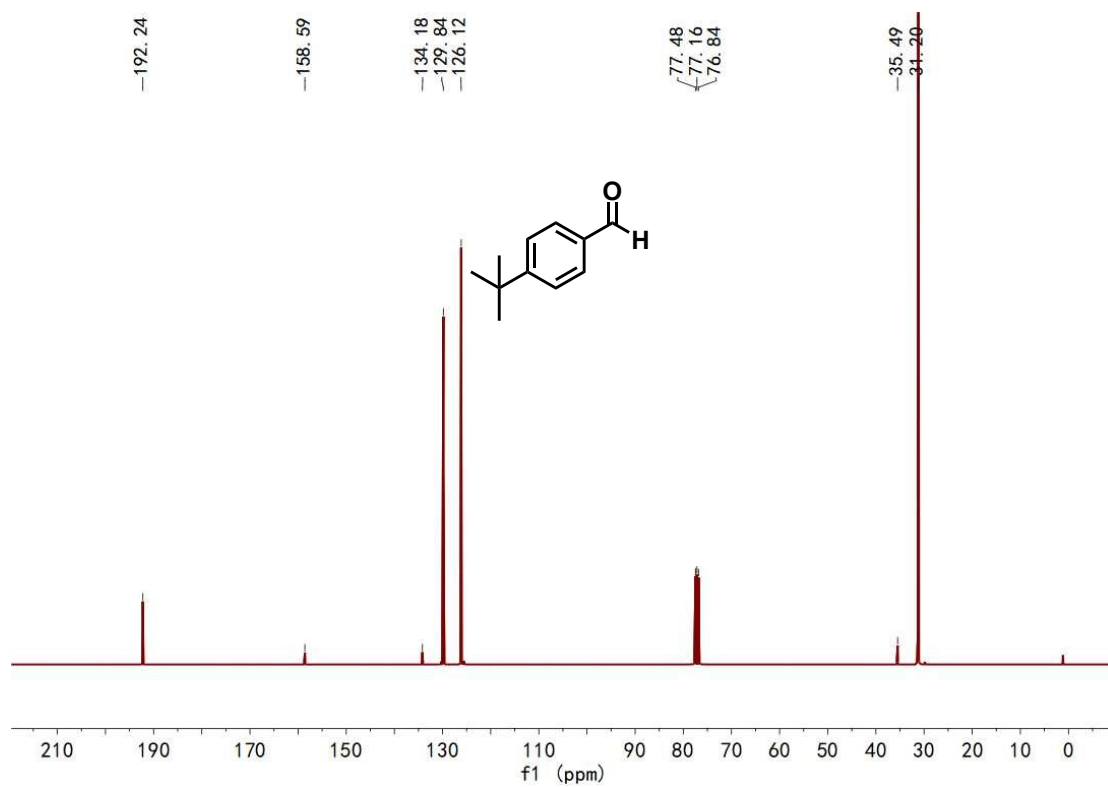

4-Methoxybenzaldehyde (4g):  $^1\text{H}$  NMR (400 MHz,  $\text{CDCl}_3$ )

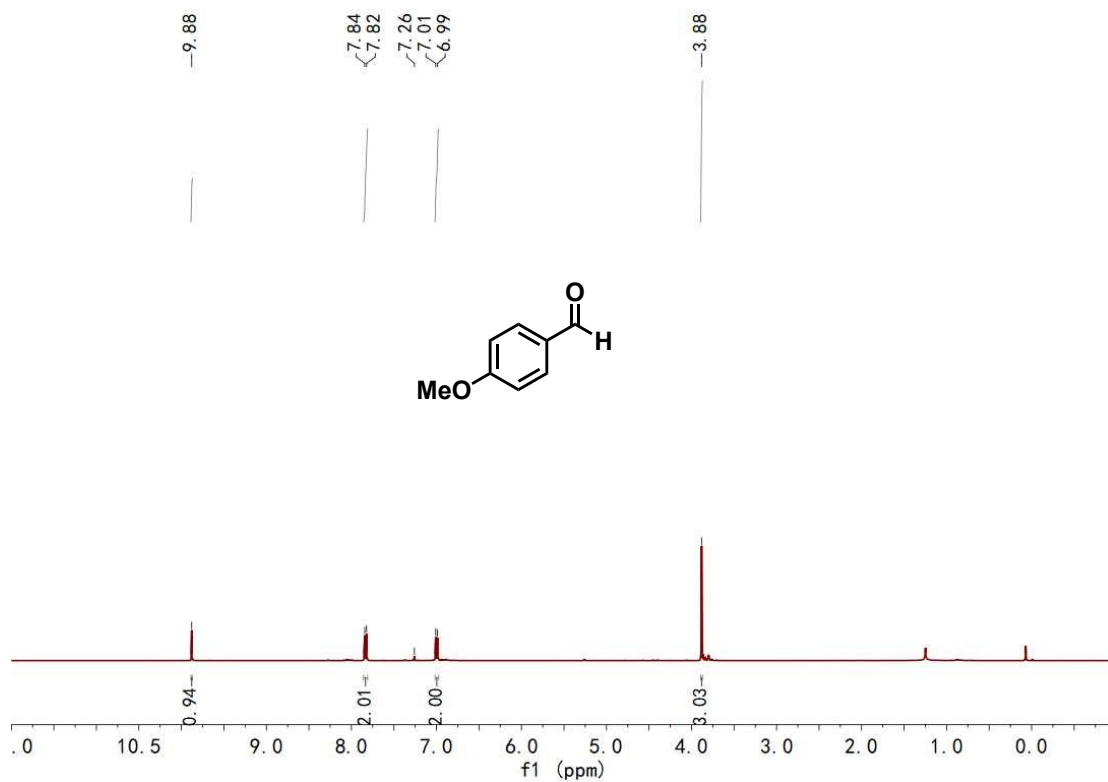

4-Methoxybenzaldehyde (4g):  $^{13}\text{C}\{^1\text{H}\}$  NMR (101 MHz,  $\text{CDCl}_3$ )

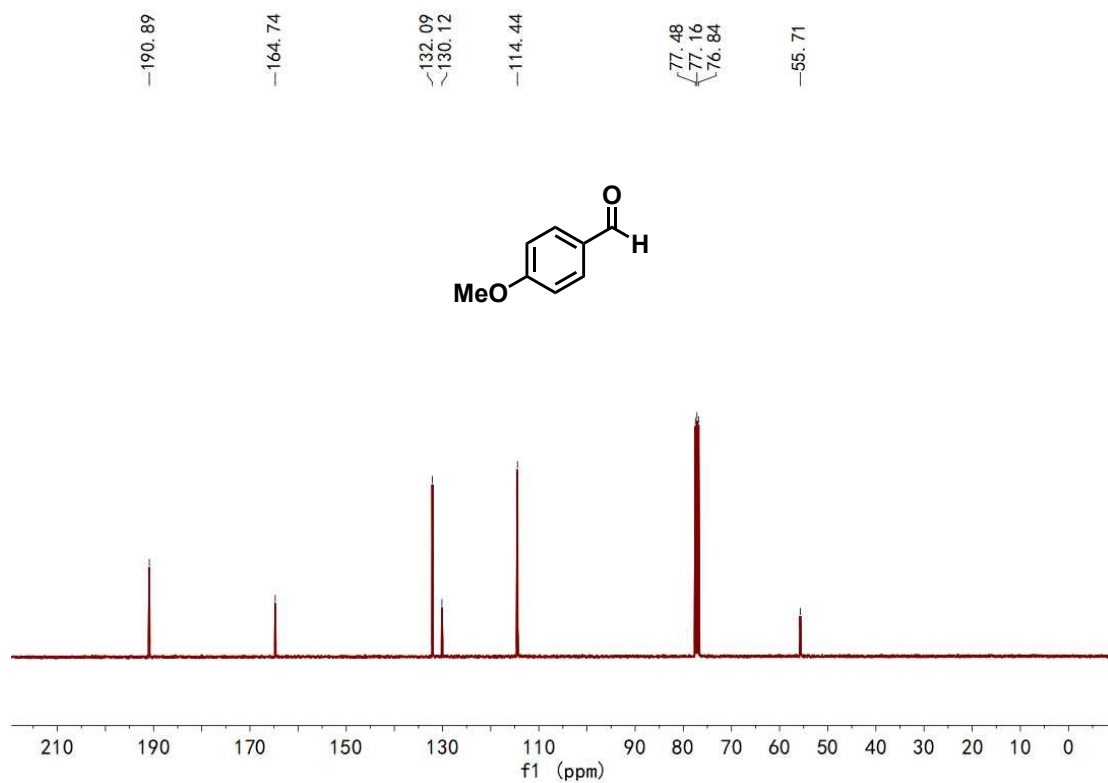

**3-Methoxybenzaldehyde (4h):  $^1\text{H}$  NMR (400 MHz,  $\text{CDCl}_3$ )**

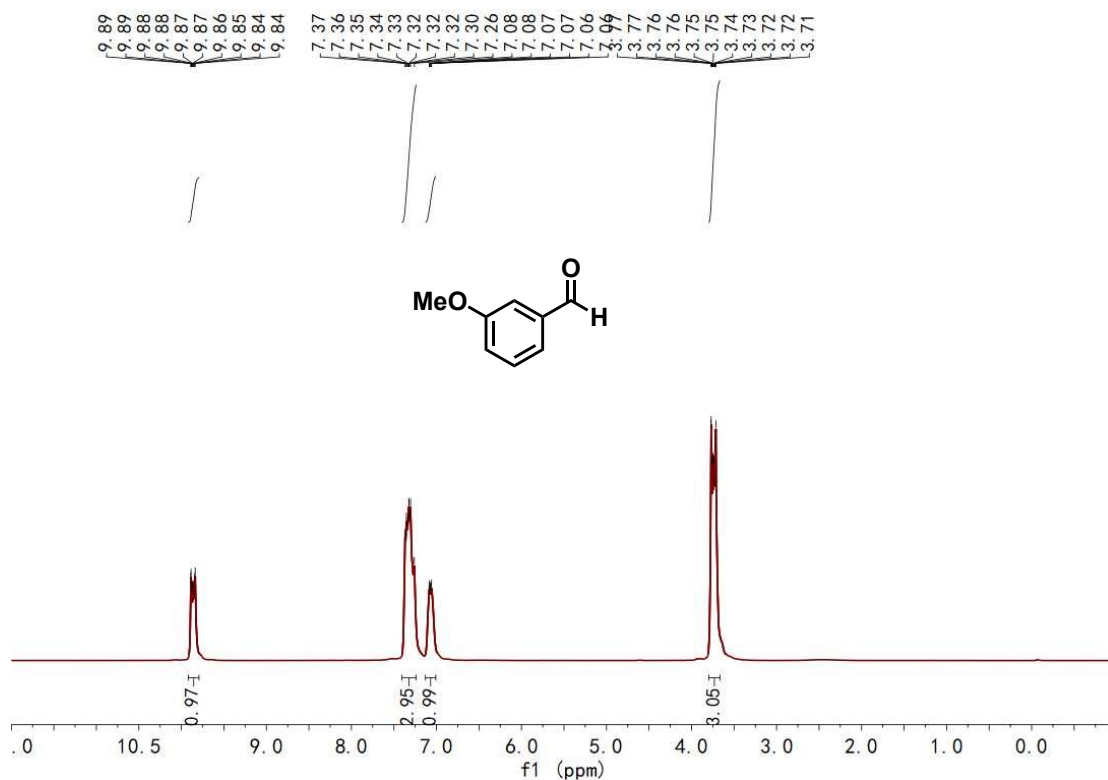

**3-Methoxybenzaldehyde (4h):  $^{13}\text{C}\{^1\text{H}\}$  NMR (101 MHz,  $\text{CDCl}_3$ )**

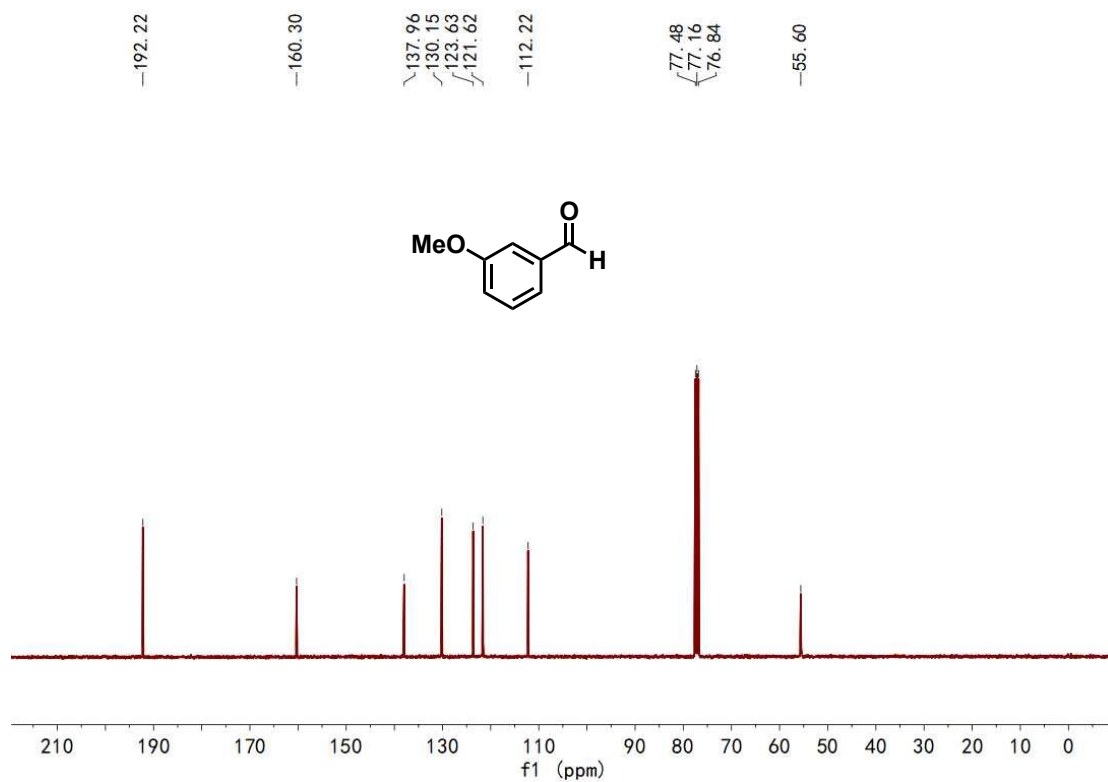

4-Ethoxybenzaldehyde (4i):  $^1\text{H}$  NMR(400 MHz,  $\text{CDCl}_3$ )

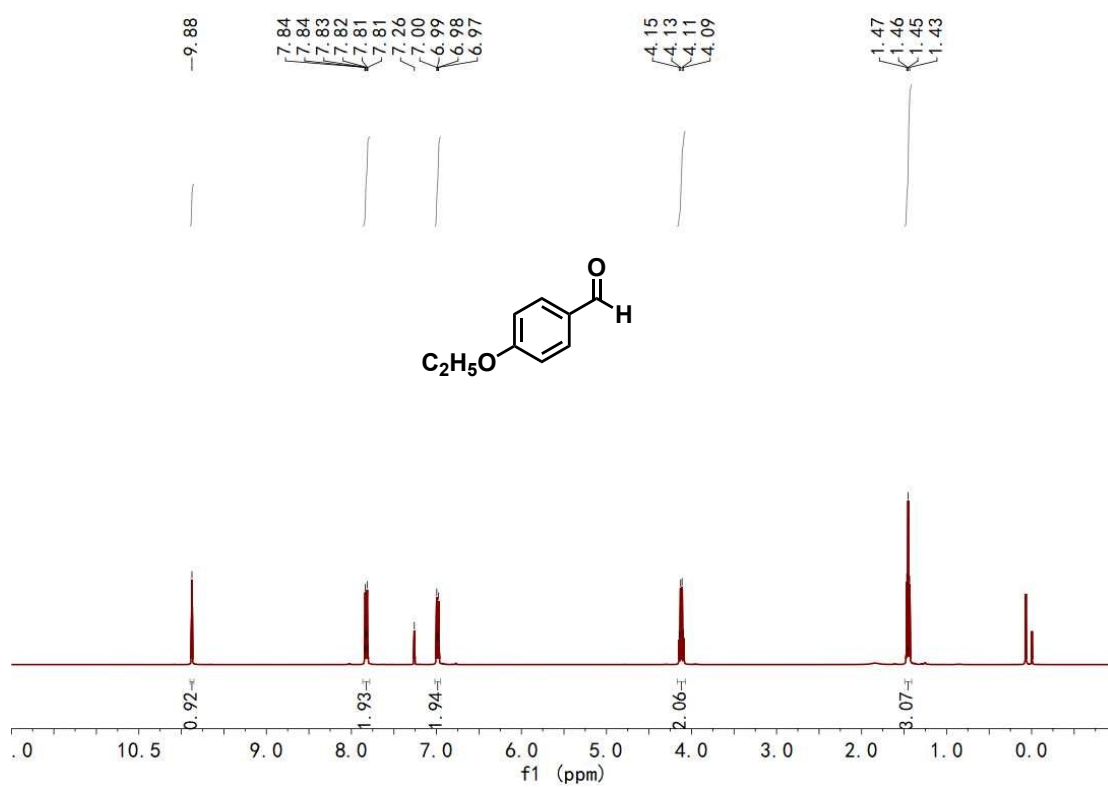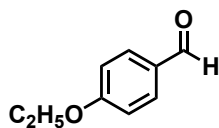

4-Ethoxybenzaldehyde (4i):  $^{13}\text{C}\{^1\text{H}\}$  NMR (101 MHz,  $\text{CDCl}_3$ )

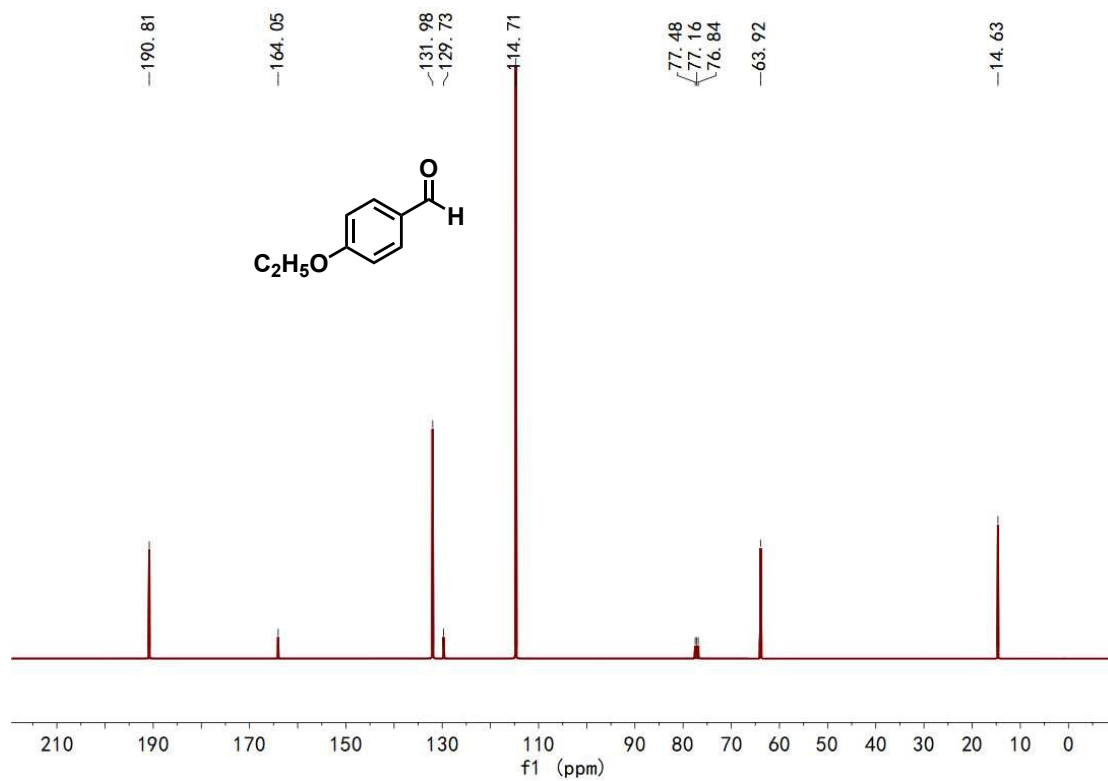

4-(4,4,5,5-Tetramethyl-1,3,2-dioxaborolan-2-yl)benzaldehyde (4j):  $^1\text{H}$  NMR (400 MHz,  $\text{CDCl}_3$ )

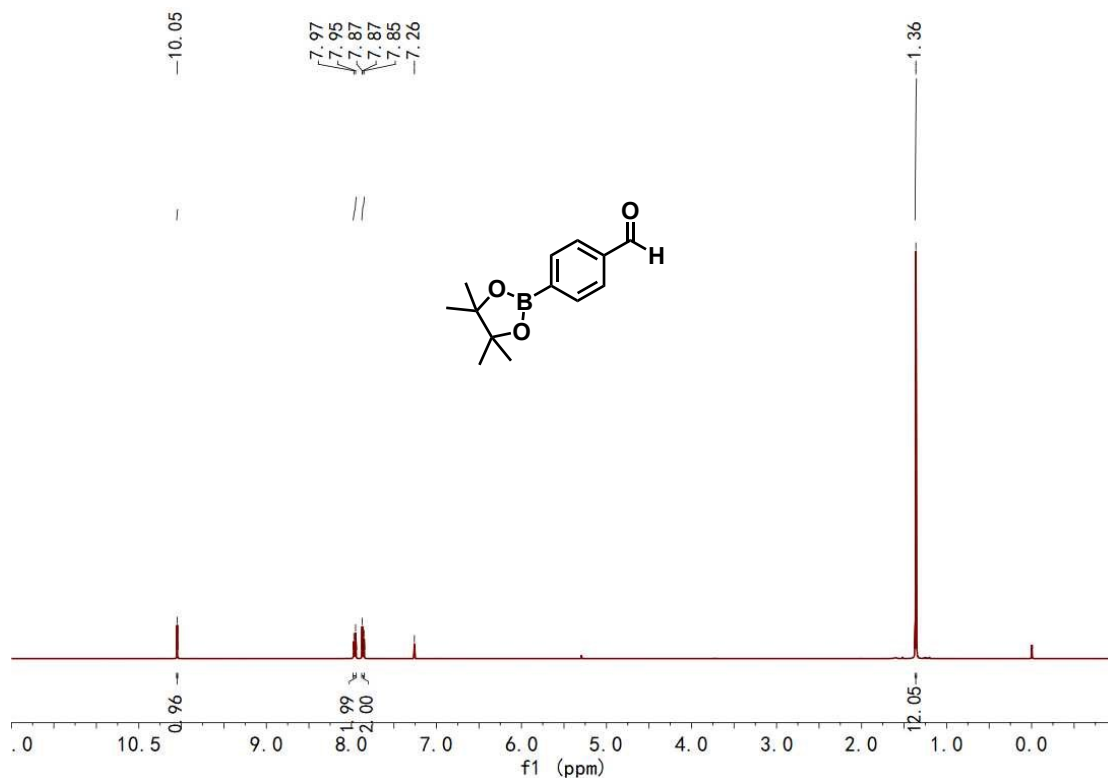

4-(4,4,5,5-Tetramethyl-1,3,2-dioxaborolan-2-yl)benzaldehyde (4j):  $^{13}\text{C}\{^1\text{H}\}$  NMR (101 MHz,  $\text{CDCl}_3$ )

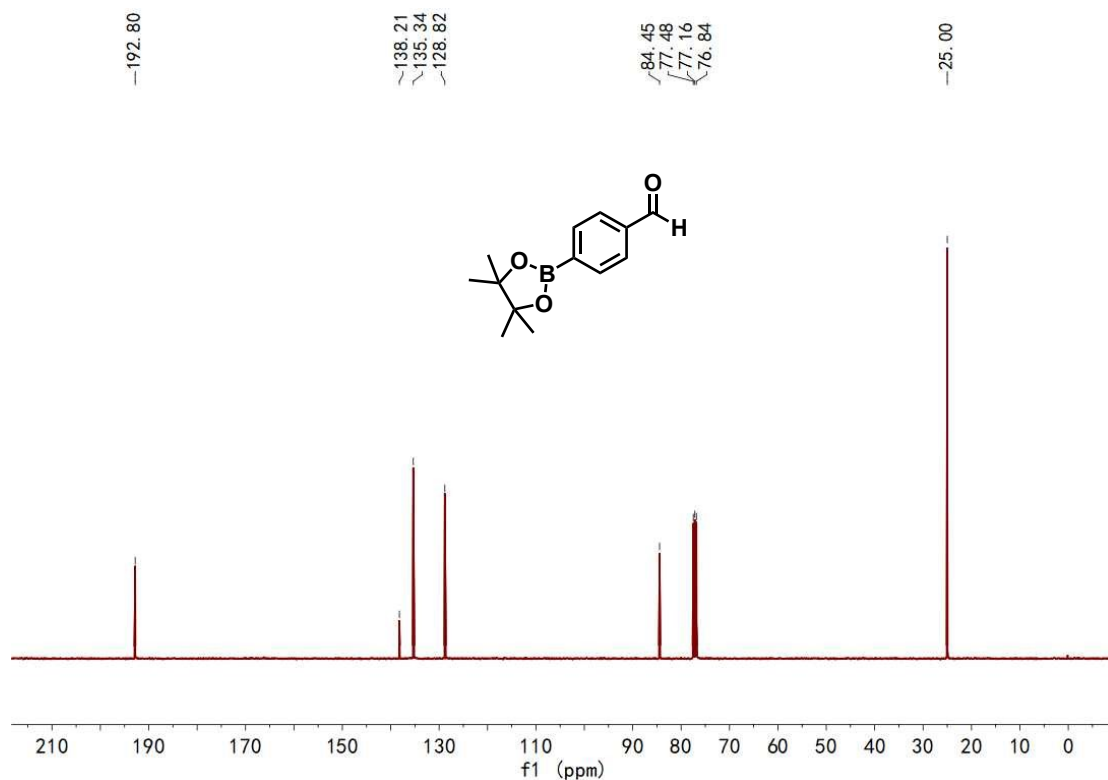

4-Nitrobenzaldehyde (4k):  $^1\text{H}$  NMR(400 MHz,  $\text{CDCl}_3$ )

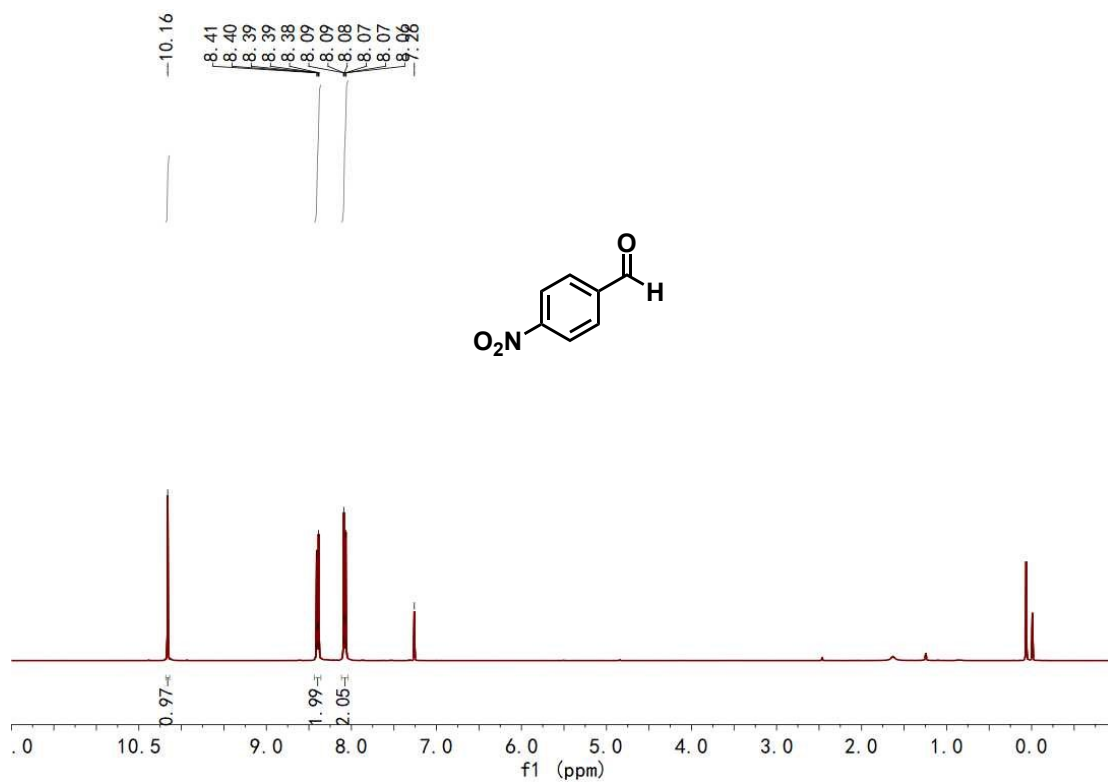

4-Nitrobenzaldehyde (4k):  $^{13}\text{C}\{^1\text{H}\}$  NMR (101 MHz,  $\text{CDCl}_3$ )

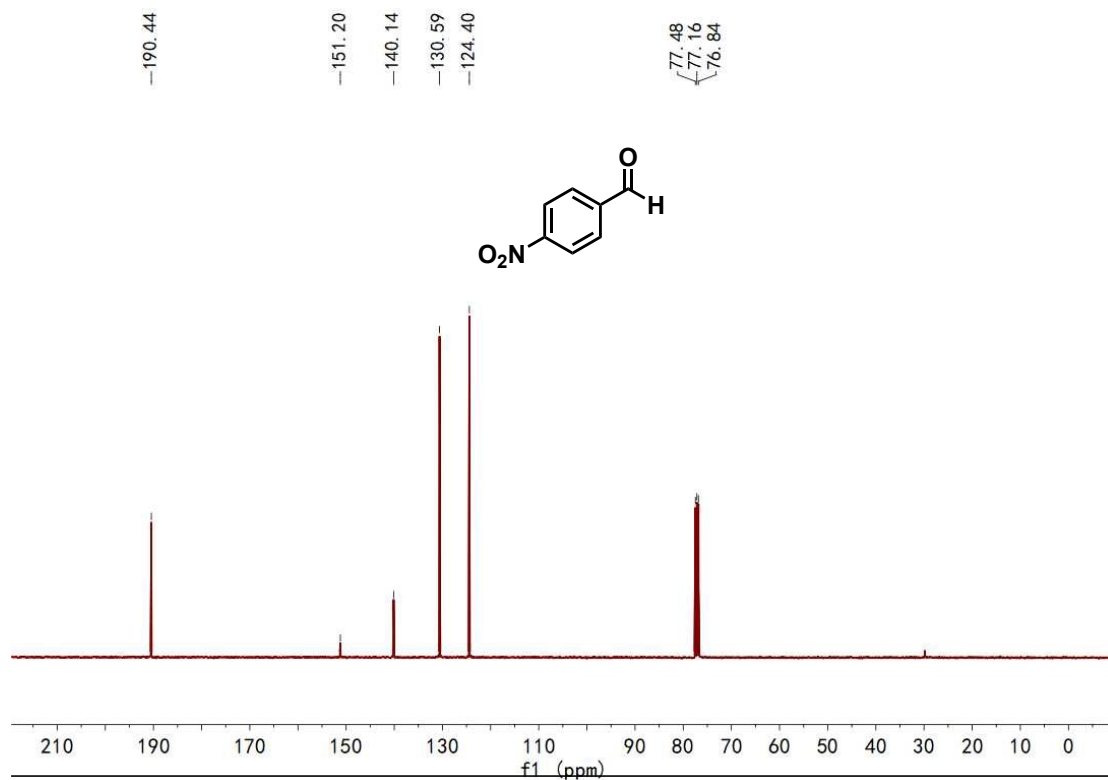

**4-Bromobenzaldehyde (4l):  $^1\text{H}$  NMR(400 MHz,  $\text{CDCl}_3$ )**

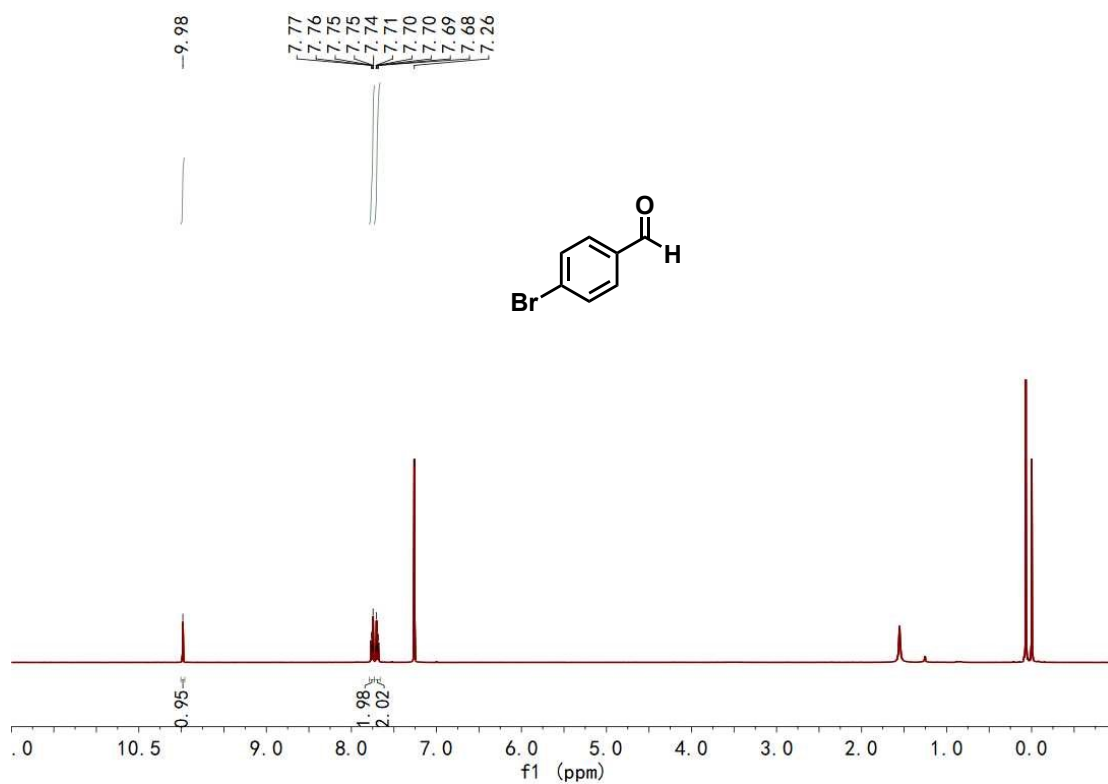

**4-Bromobenzaldehyde (4l):  $^{13}\text{C}\{^1\text{H}\}$  NMR(101 MHz,  $\text{CDCl}_3$ )**

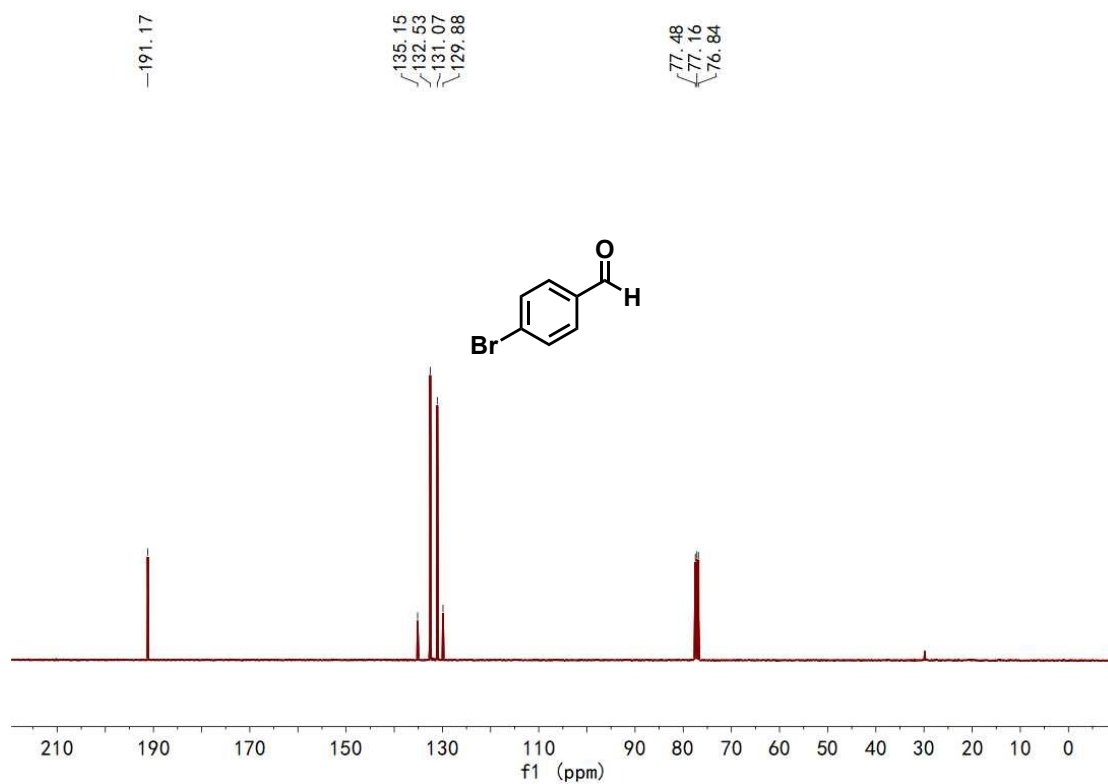

**4-Chlorobenzaldehyde (4m):  $^1\text{H}$  NMR (400 MHz,  $\text{CDCl}_3$ )**

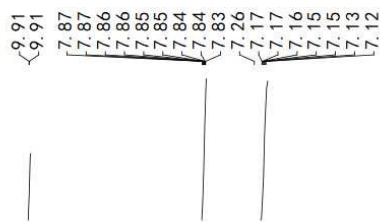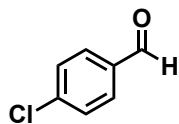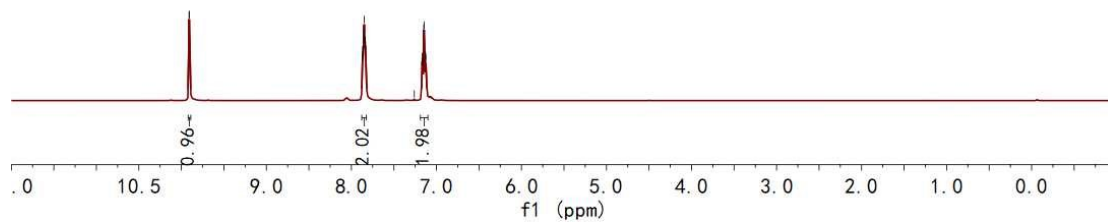

**4-Chlorobenzaldehyde (4m):  $^{13}\text{C}\{^1\text{H}\}$  NMR (101 MHz,  $\text{CDCl}_3$ )**

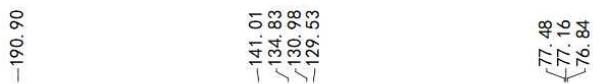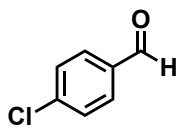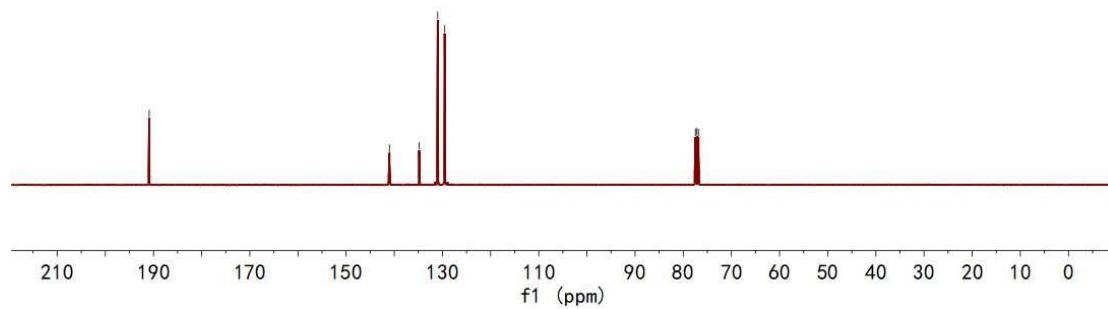

4-Fluorobenzaldehyde (4n):  $^1\text{H}$  NMR (400 MHz,  $\text{CDCl}_3$ )

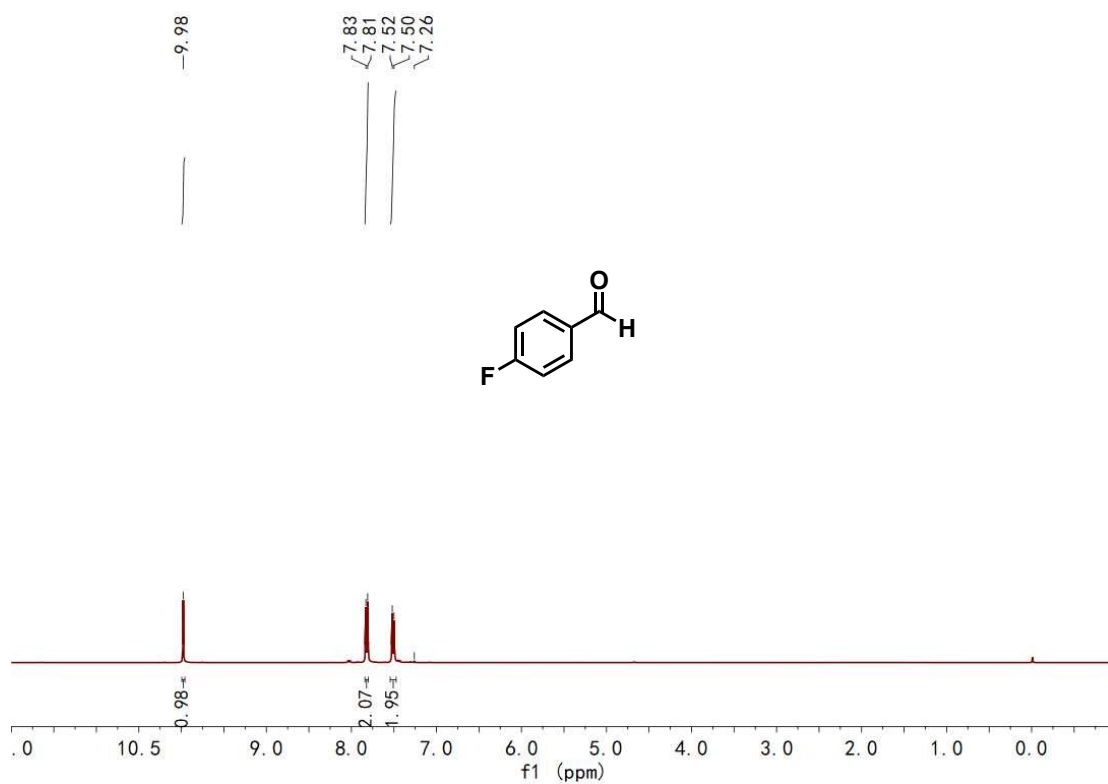

4-Fluorobenzaldehyde (4n):  $^{13}\text{C}\{^1\text{H}\}$  NMR (101 MHz,  $\text{CDCl}_3$ )

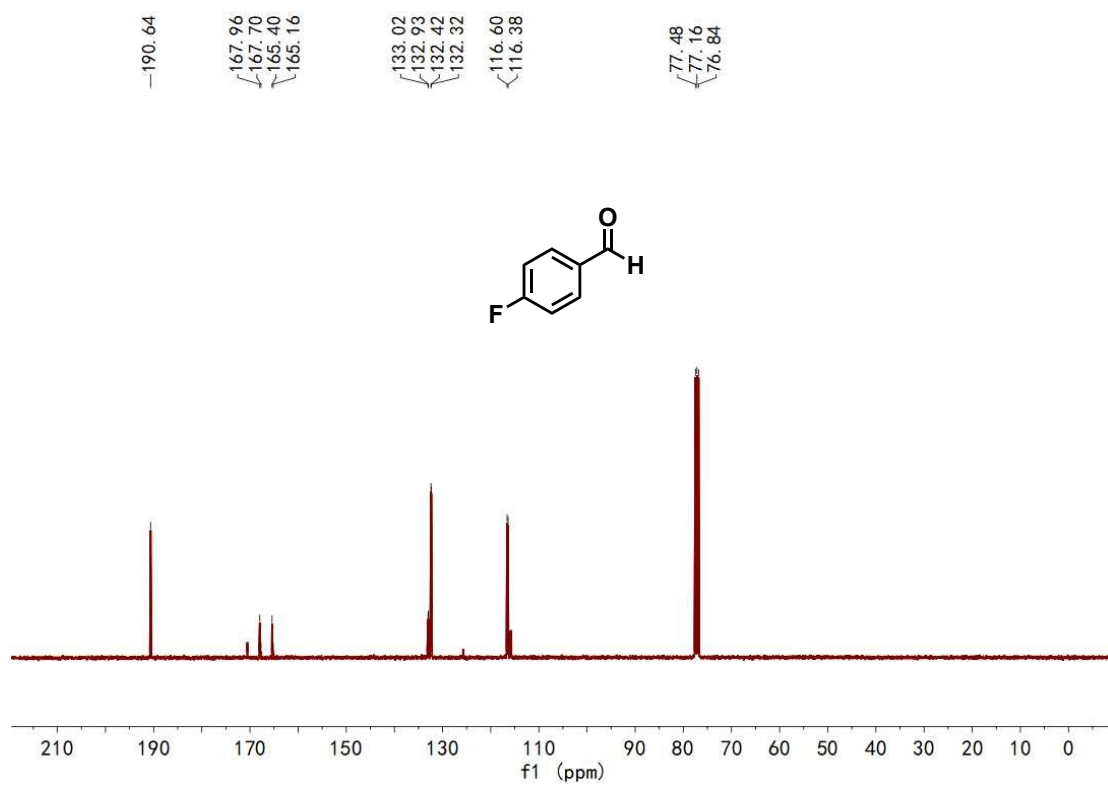

4-Fluorobenzaldehyde (4n):  $^{19}\text{F}$  NMR (376 MHz,  $\text{CDCl}_3$ )

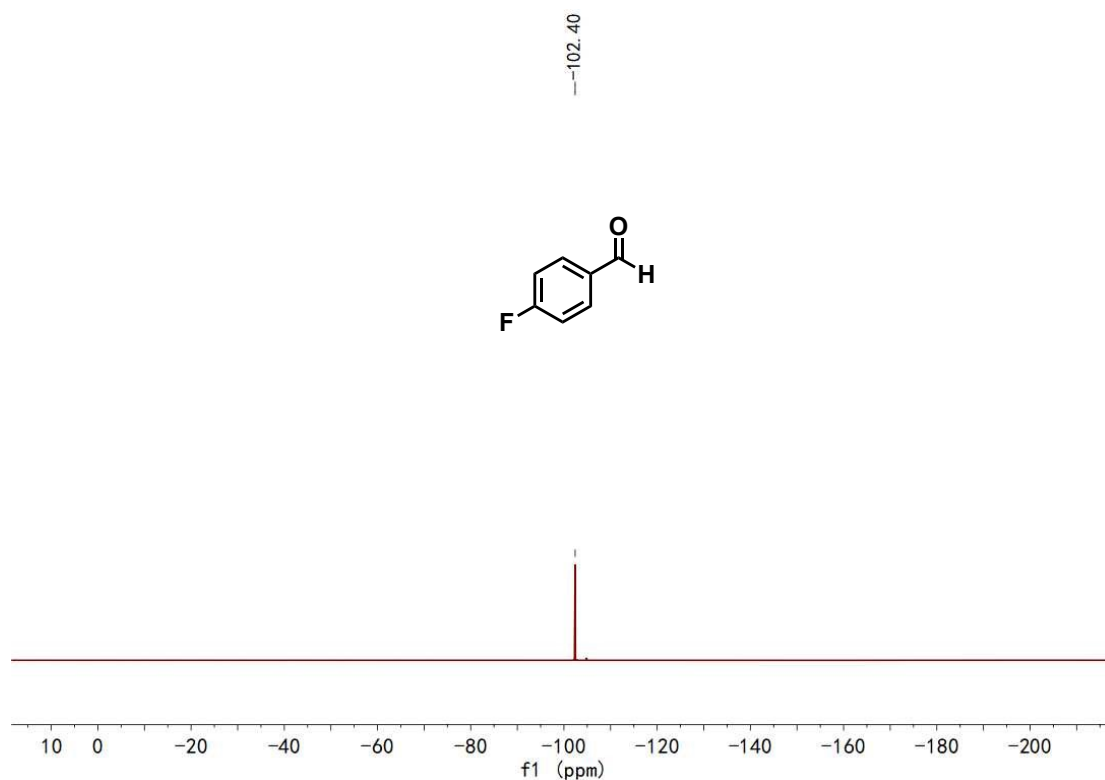

3,4-Difluorobenzaldehyde (4o):  $^1\text{H}$  NMR (400 MHz,  $\text{CDCl}_3$ )

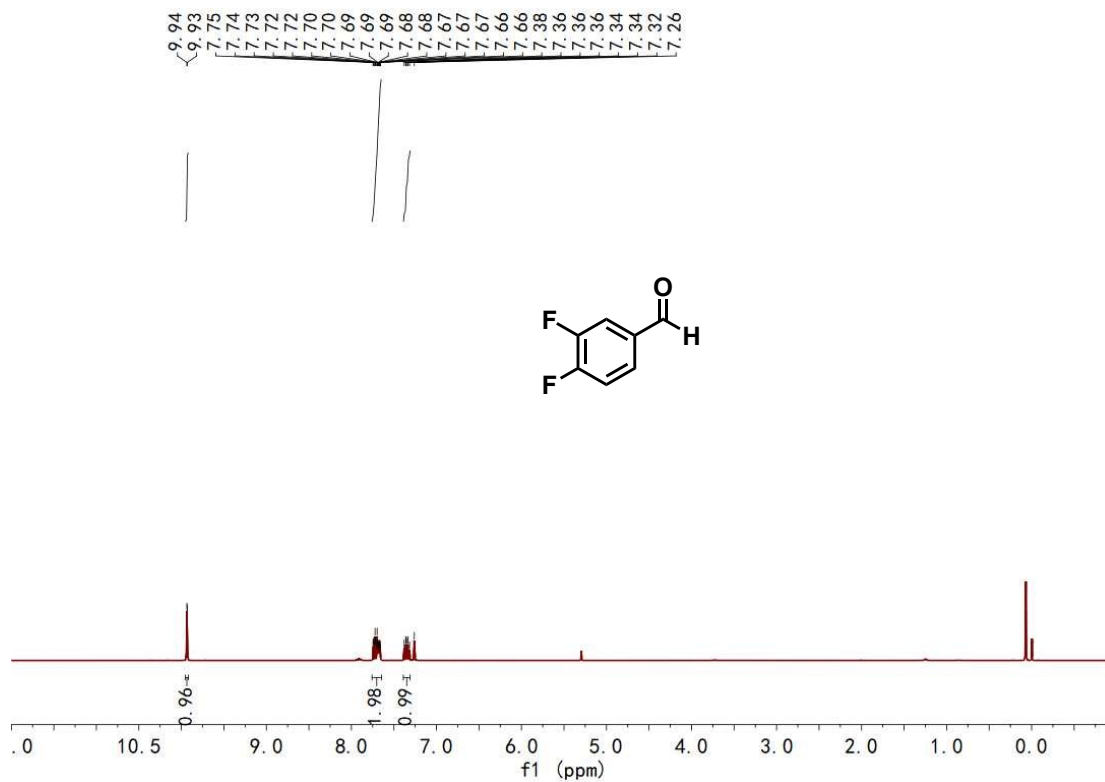

**3,4-Difluorobenzaldehyde (4o):  $^{13}\text{C}\{^1\text{H}\}$  NMR (101 MHz,  $\text{CDCl}_3$ )**

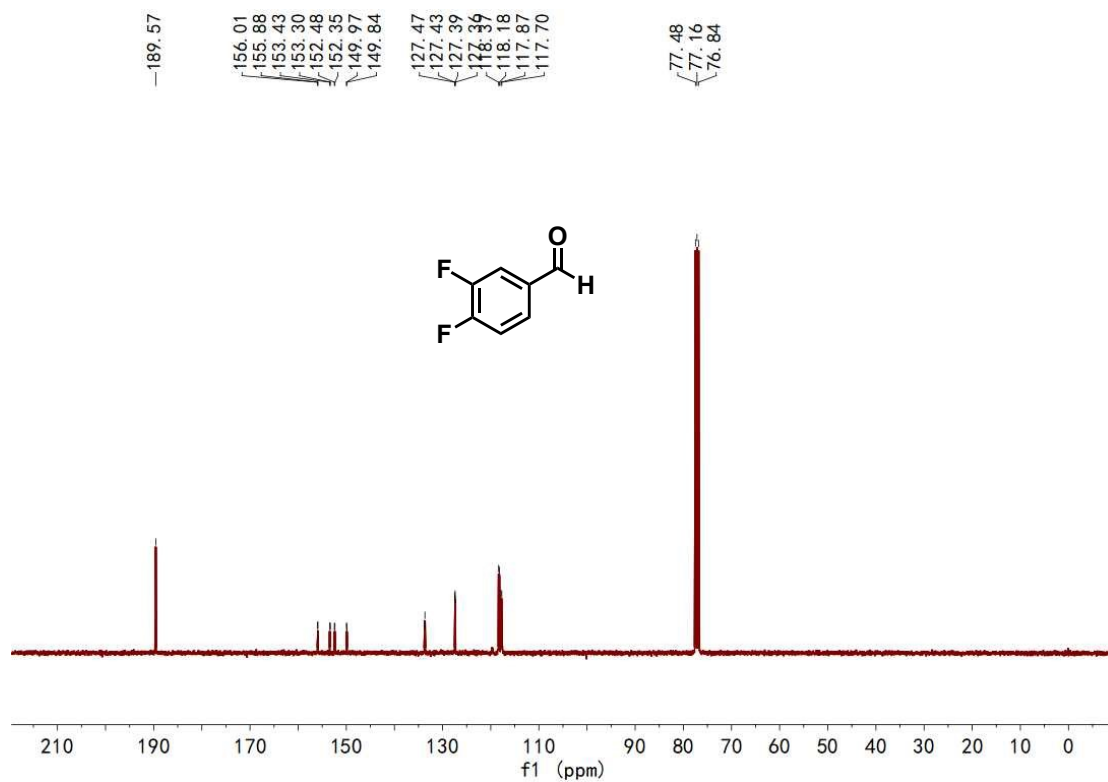

**3,4-Difluorobenzaldehyde (4o):  $^{19}\text{F}$  NMR (376 MHz,  $\text{CDCl}_3$ )**

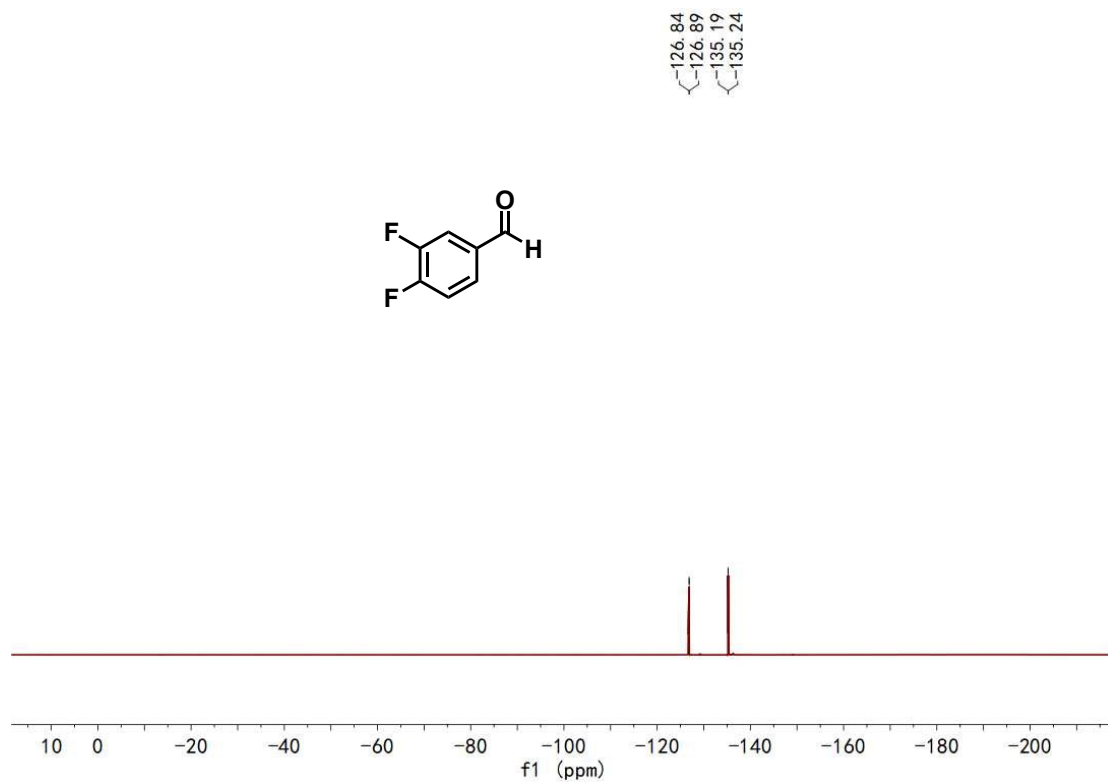

***Tert*-butyl 4-formylbenzoate (4p):  $^1\text{H}$  NMR (400 MHz,  $\text{CDCl}_3$ )**

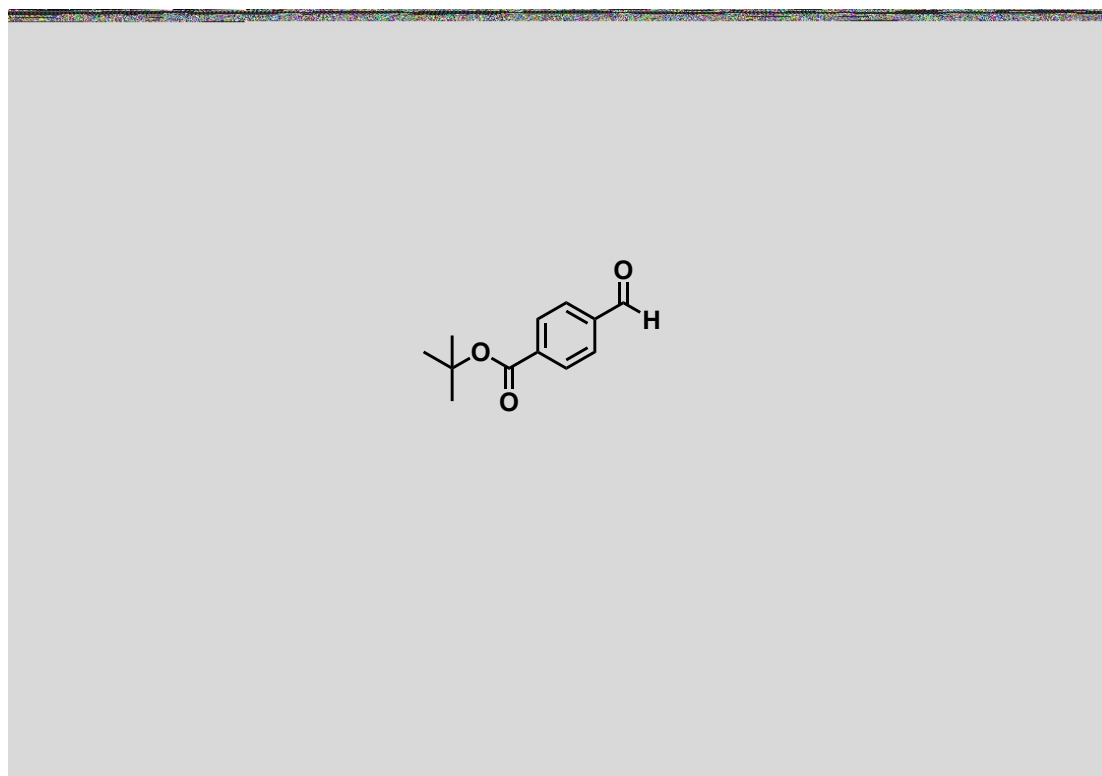

***Tert*-butyl 4-formylbenzoate (4p):  $^{13}\text{C}\{^1\text{H}\}$  NMR (101 MHz,  $\text{CDCl}_3$ )**

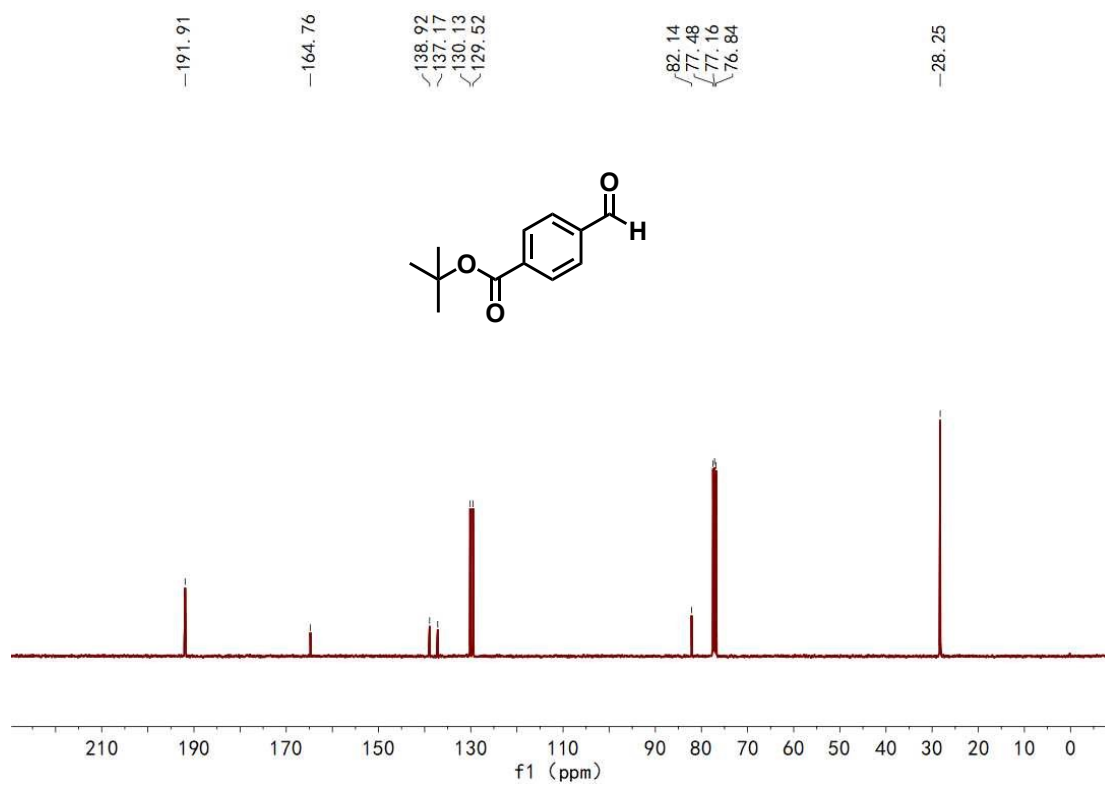

**Thiophene-2-carbaldehyde (4q):  $^1\text{H}$  NMR (400 MHz,  $\text{CDCl}_3$ )**

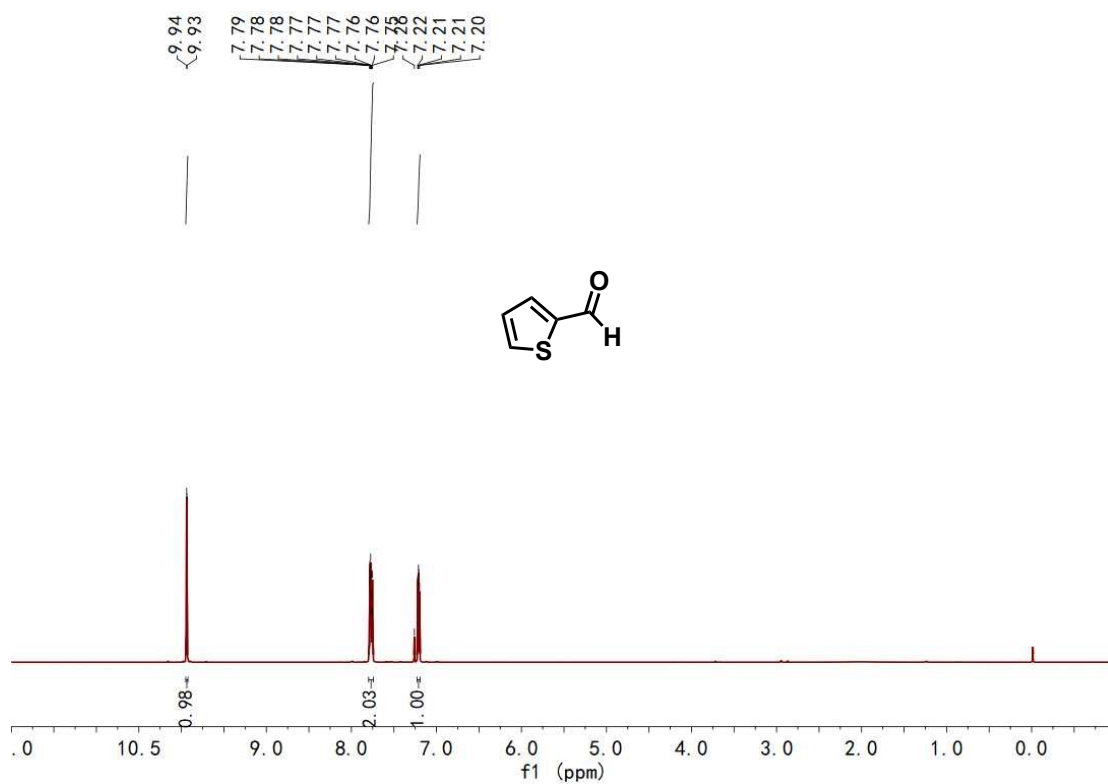

**Thiophene-2-carbaldehyde (4q):  $^{13}\text{C}\{^1\text{H}\}$  NMR (101 MHz,  $\text{CDCl}_3$ )**

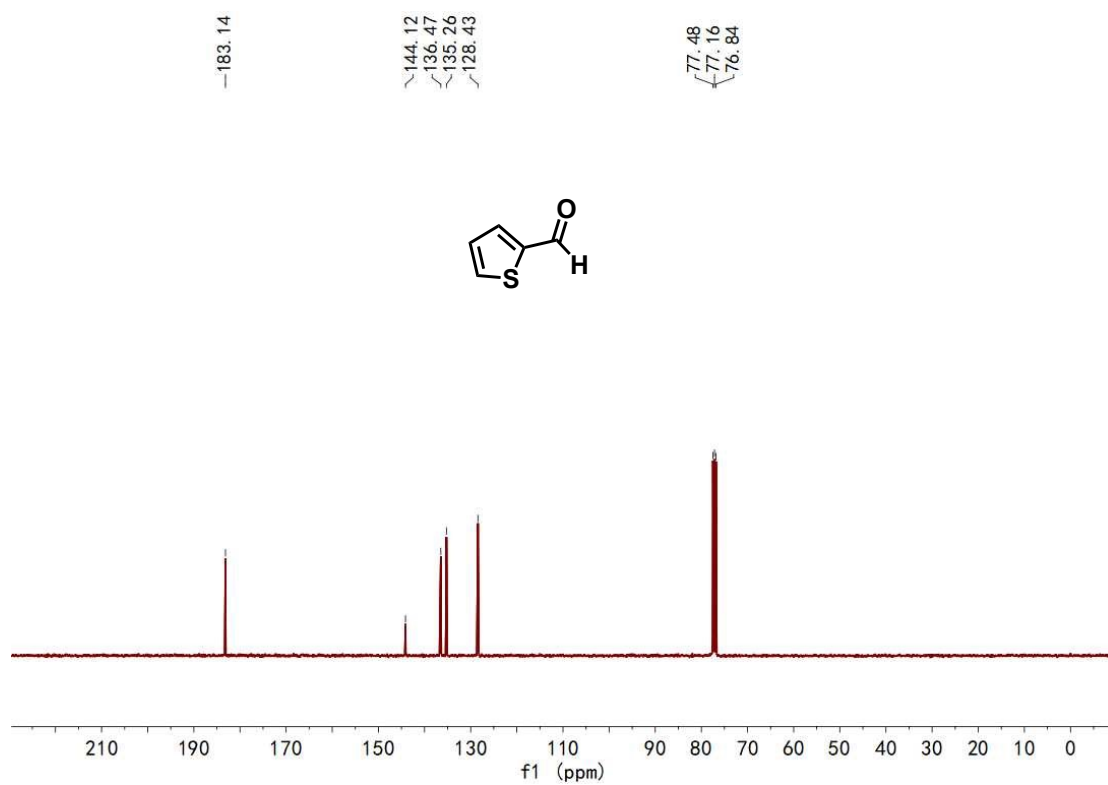

**Picolinaldehyde (4r):  $^1\text{H}$ NMR (400MHz,  $\text{CDCl}_3$ )**

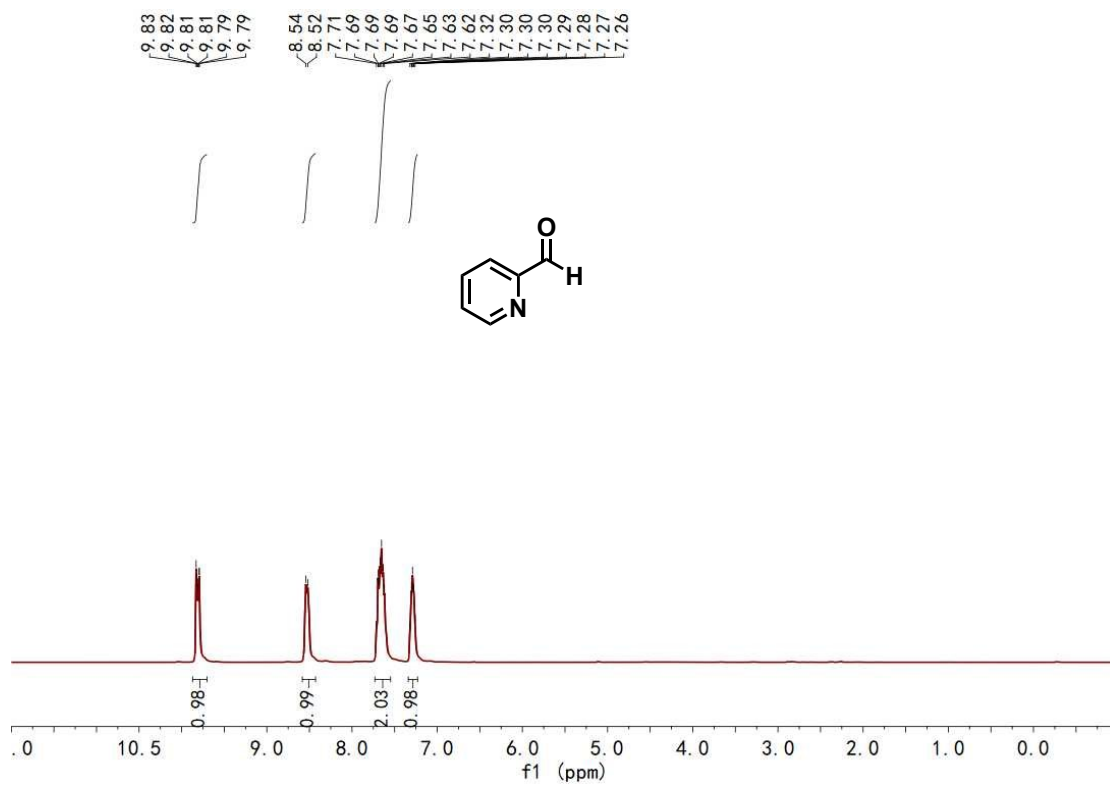

**Picolinaldehyde (4r):  $^{13}\text{C}\{^1\text{H}\}$  NMR (101 MHz,  $\text{CDCl}_3$ )**

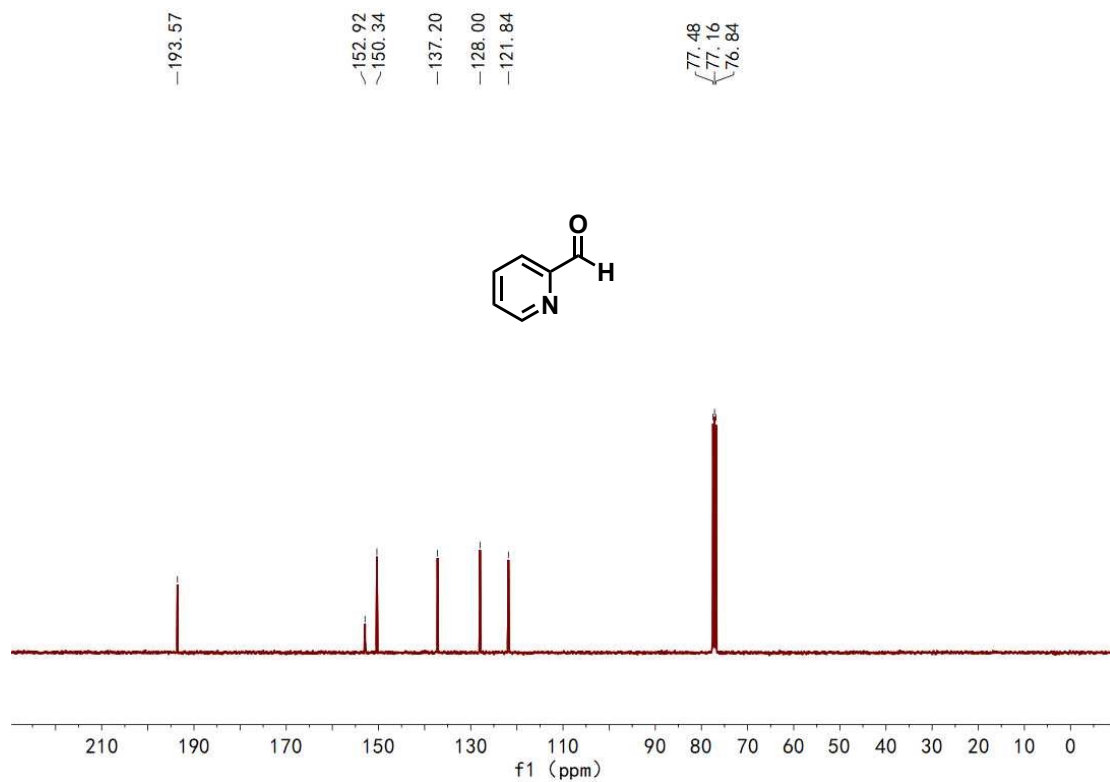

4-Acetylbenzaldehyde (4s):  $^1\text{H}$  NMR (400 MHz,  $\text{CDCl}_3$ )

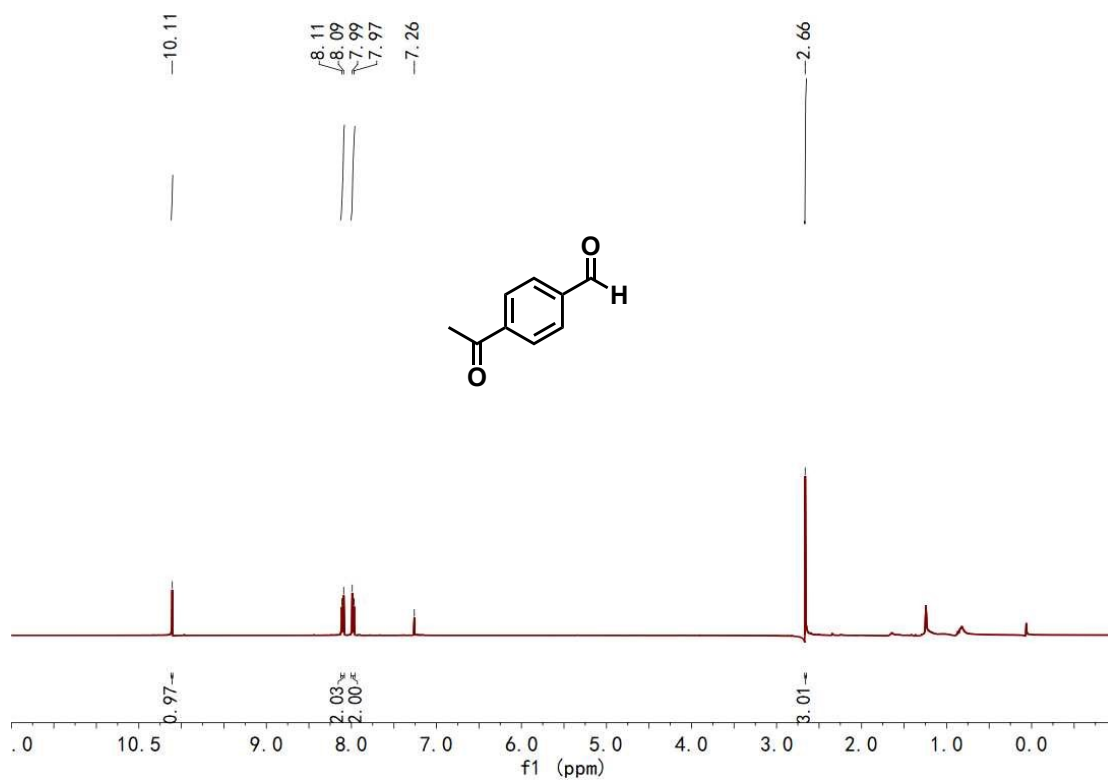

Acetylbenzaldehyde (4s):  $^{13}\text{C}\{^1\text{H}\}$  NMR (101 MHz,  $\text{CDCl}_3$ )

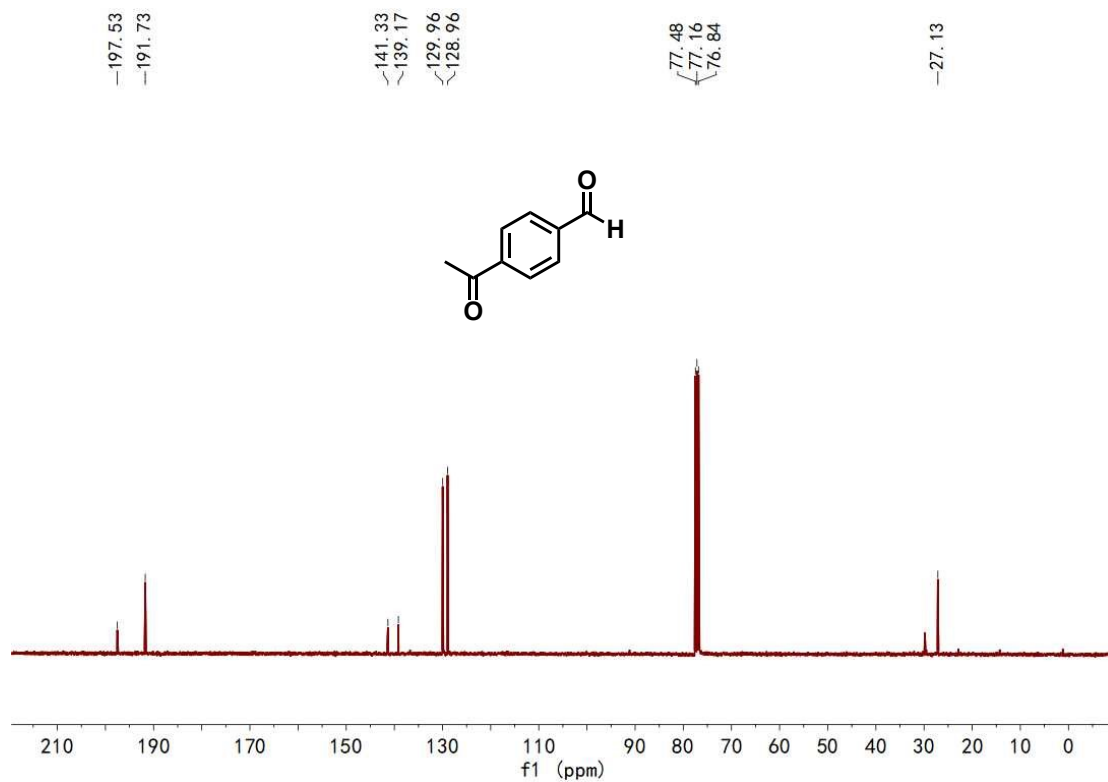

**Ethyl 4-formylbenzoate (4t):  $^1\text{H}$  NMR(400 MHz,  $\text{CDCl}_3$ )**

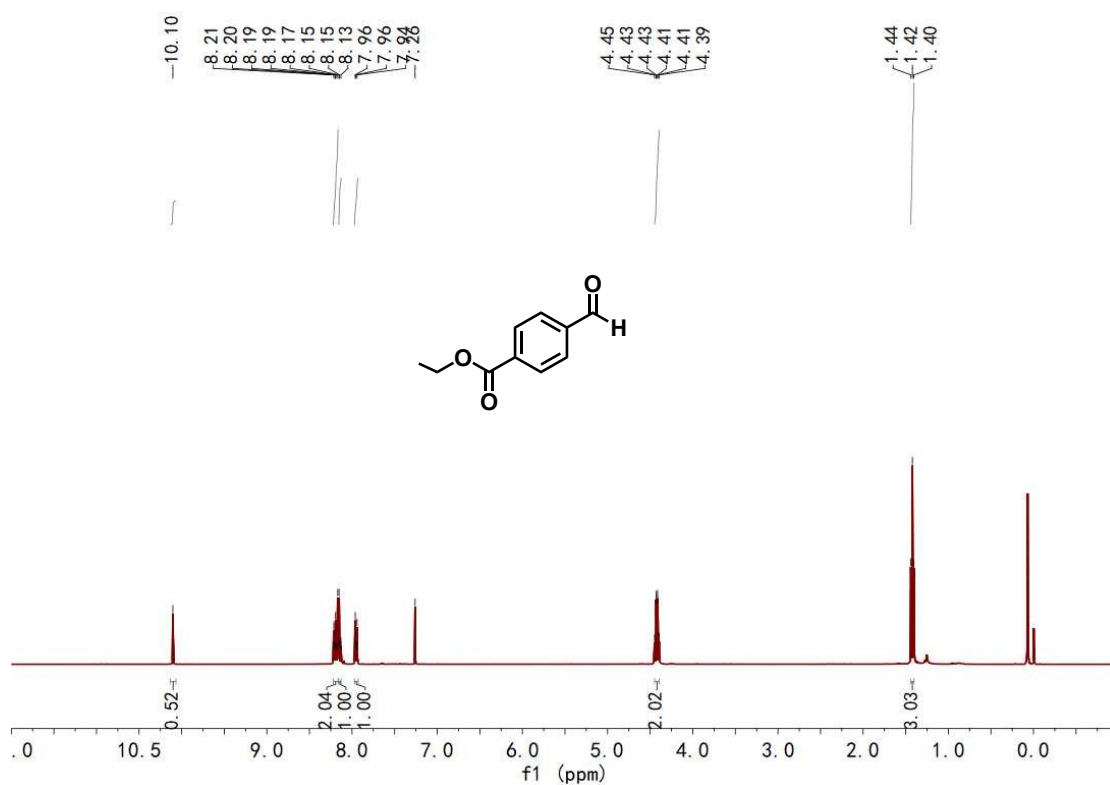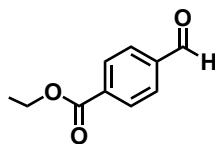

**Ethyl 4-formylbenzoate (4t):  $^{13}\text{C}\{^1\text{H}\}$  NMR (101 MHz,  $\text{CDCl}_3$ )**

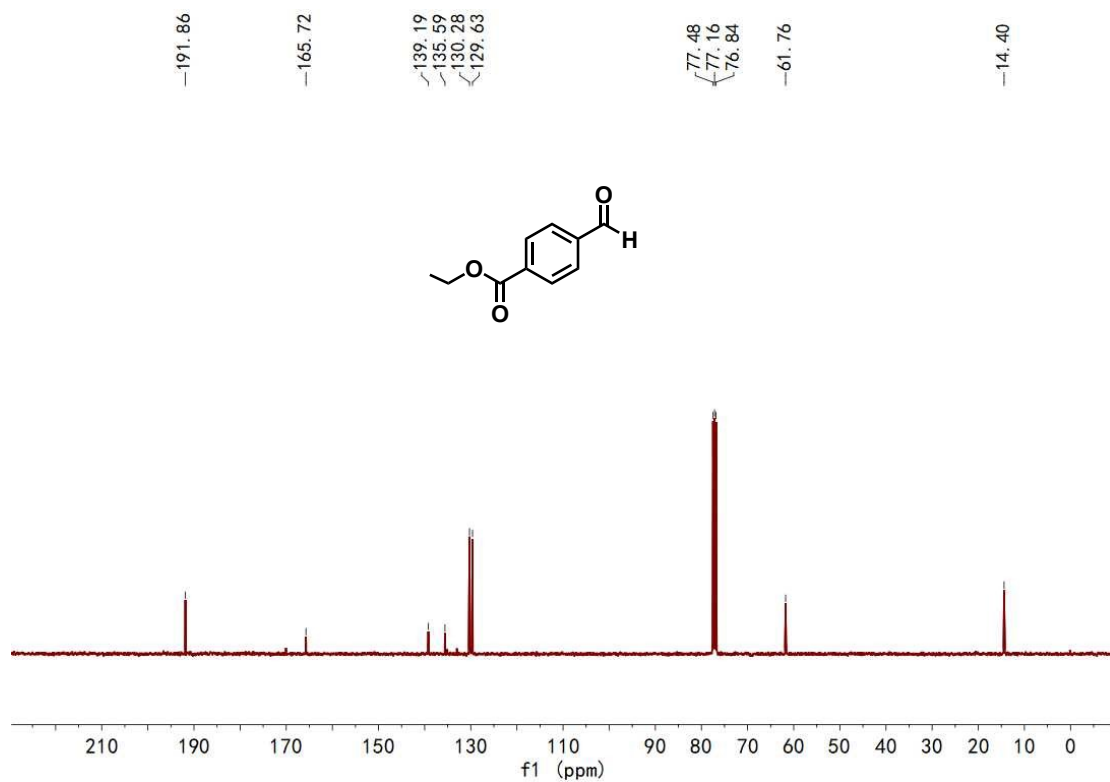

**Quinoline-8-carbaldehyde (4u):  $^1\text{H}$  NMR(400 MHz,  $\text{CDCl}_3$ )**

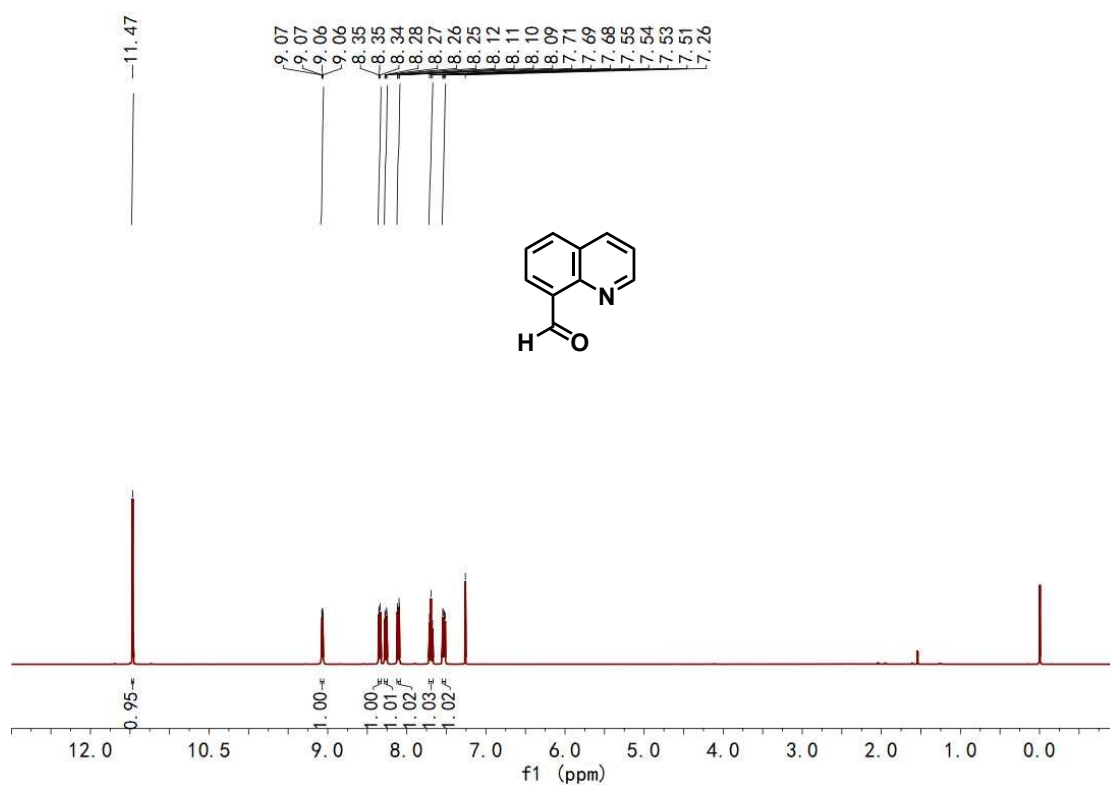

**Quinoline-8-carbaldehyde (4u):  $^{13}\text{C}\{^1\text{H}\}$  NMR (101 MHz,  $\text{CDCl}_3$ )**

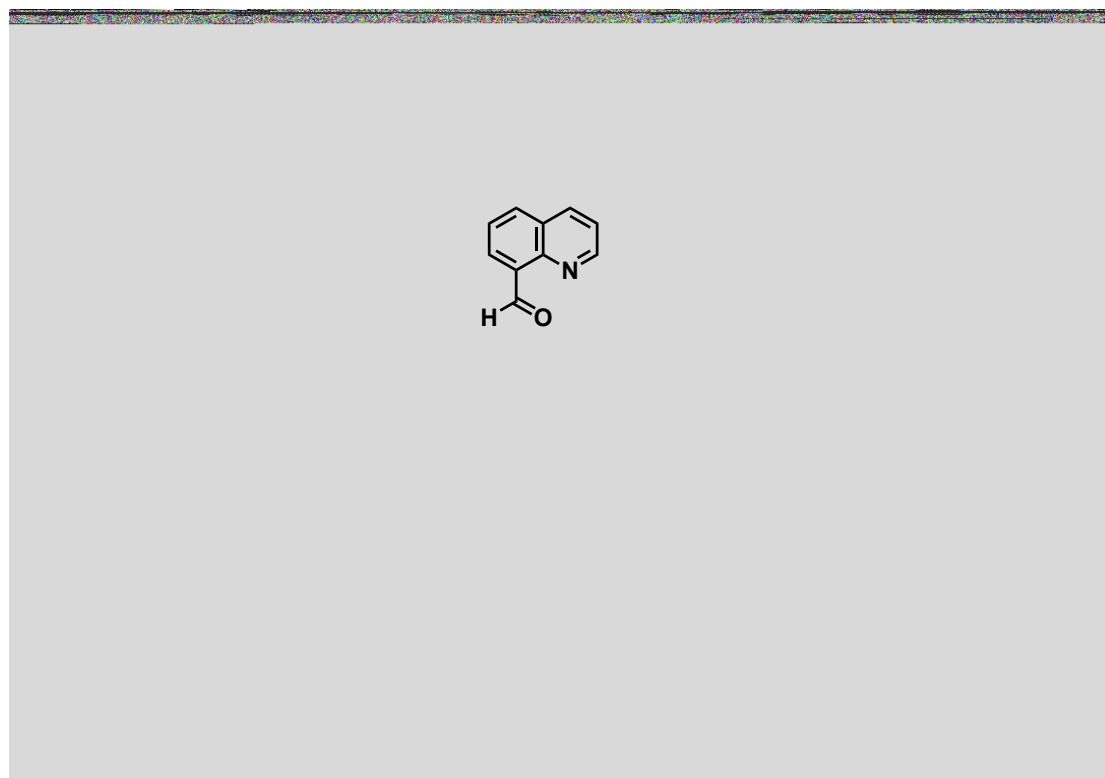

Phenyl(*p*-tolyl)methanone (6a):  $^1\text{H}$  NMR (400 MHz,  $\text{CDCl}_3$ )

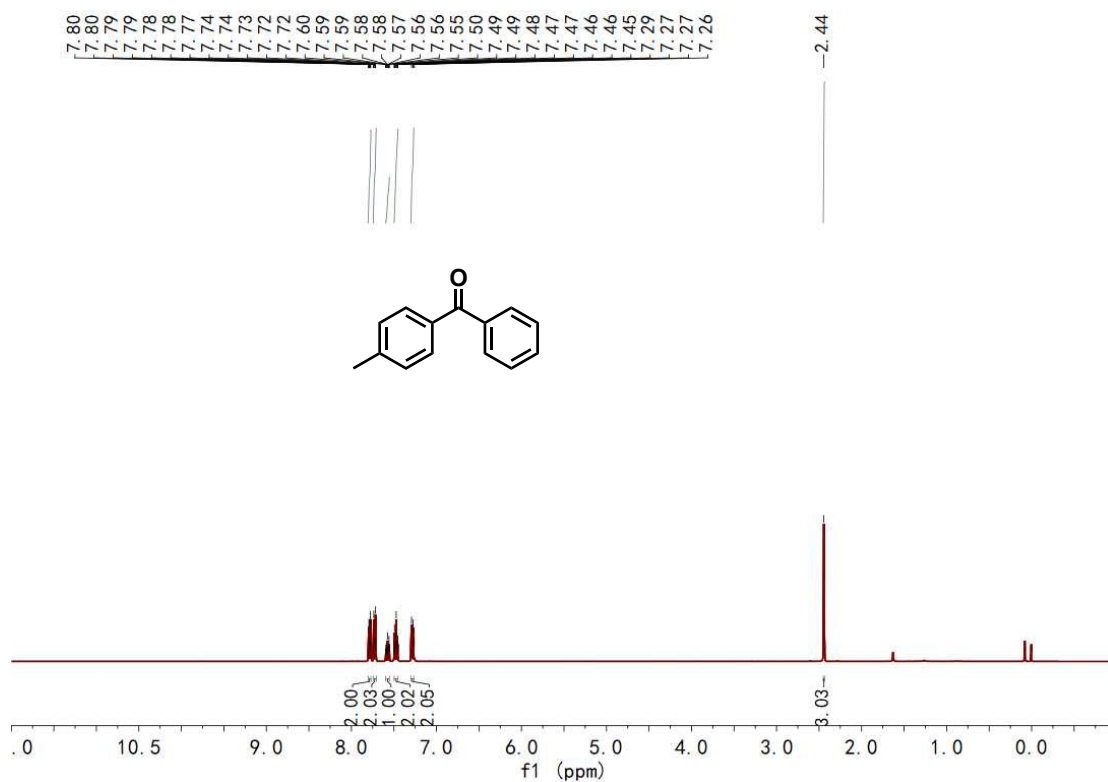

Phenyl(*p*-tolyl)methanone (6a):  $^{13}\text{C}\{^1\text{H}\}$  NMR (101 MHz,  $\text{CDCl}_3$ )

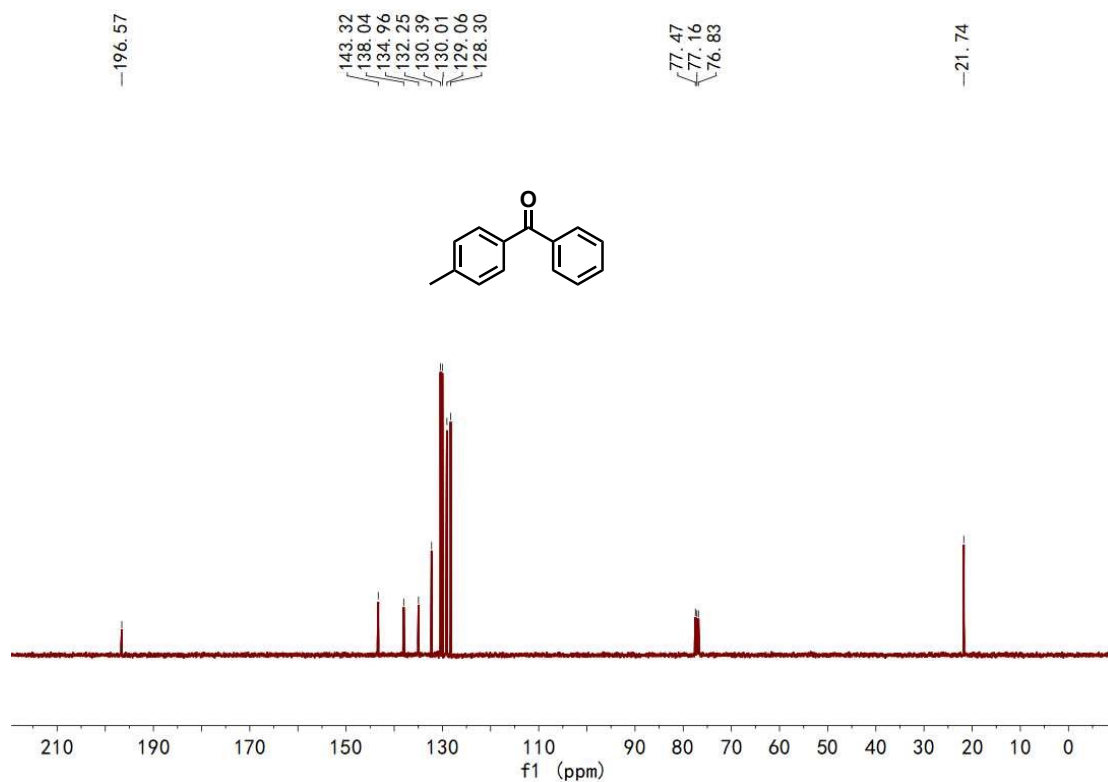

Phenyl(*o*-tolyl)methanone (6b):  $^1\text{H}$  NMR (400 MHz,  $\text{CDCl}_3$ )

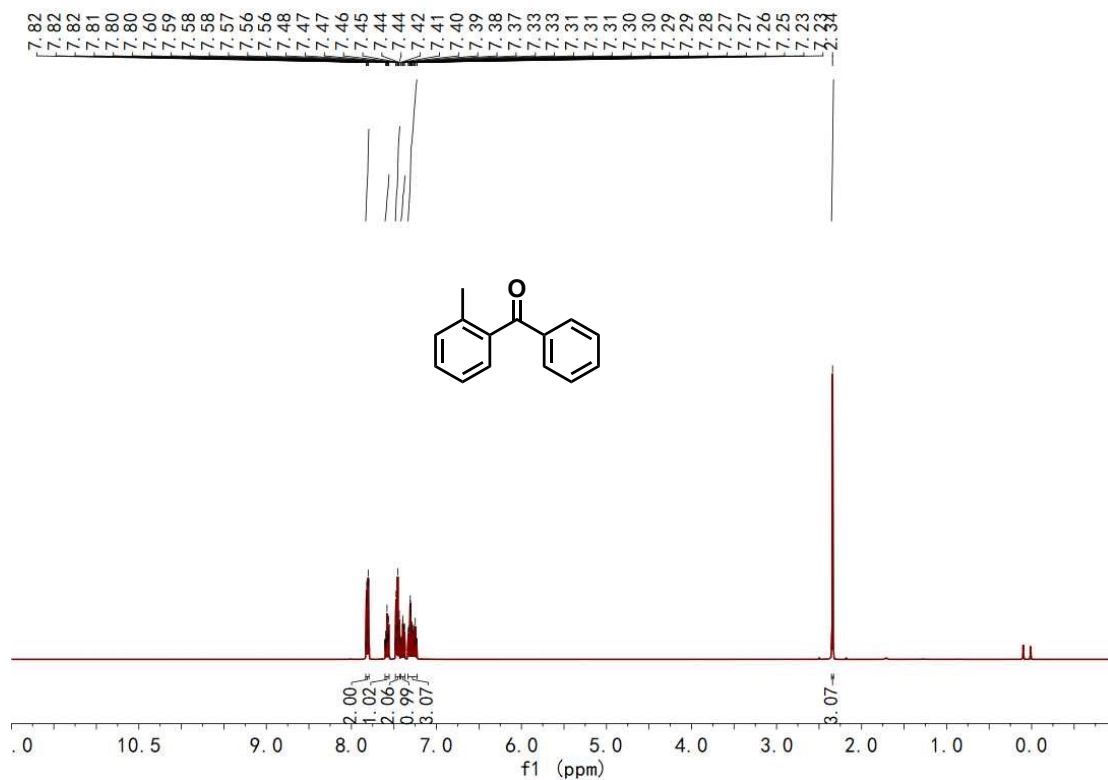

Phenyl(*o*-tolyl)methanone (6b):  $^{13}\text{C}\{^1\text{H}\}$  NMR (101MHz,  $\text{CDCl}_3$ )

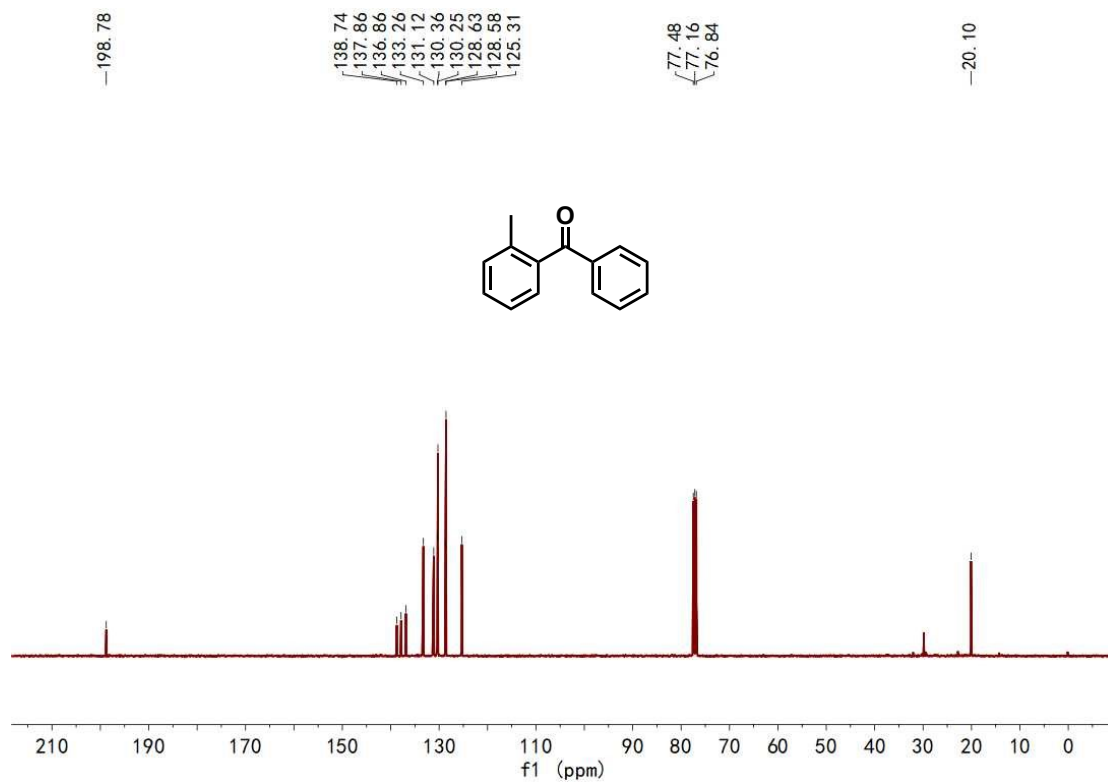

**(4-Methoxyphenyl)(phenyl)methanone (6c):  $^1\text{H}$  NMR (400 MHz,  $\text{CDCl}_3$ )**

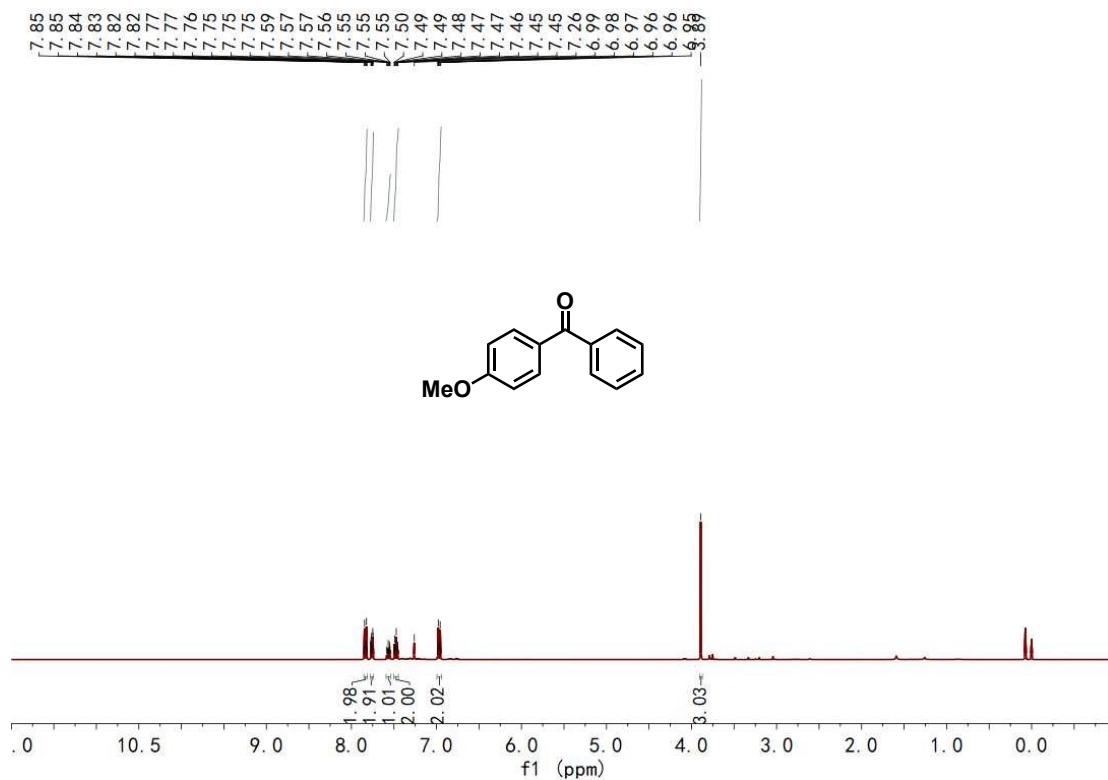

**(4-Methoxyphenyl)(phenyl)methanone (6c):  $^{13}\text{C}\{^1\text{H}\}$  NMR (101 MHz,  $\text{CDCl}_3$ )**

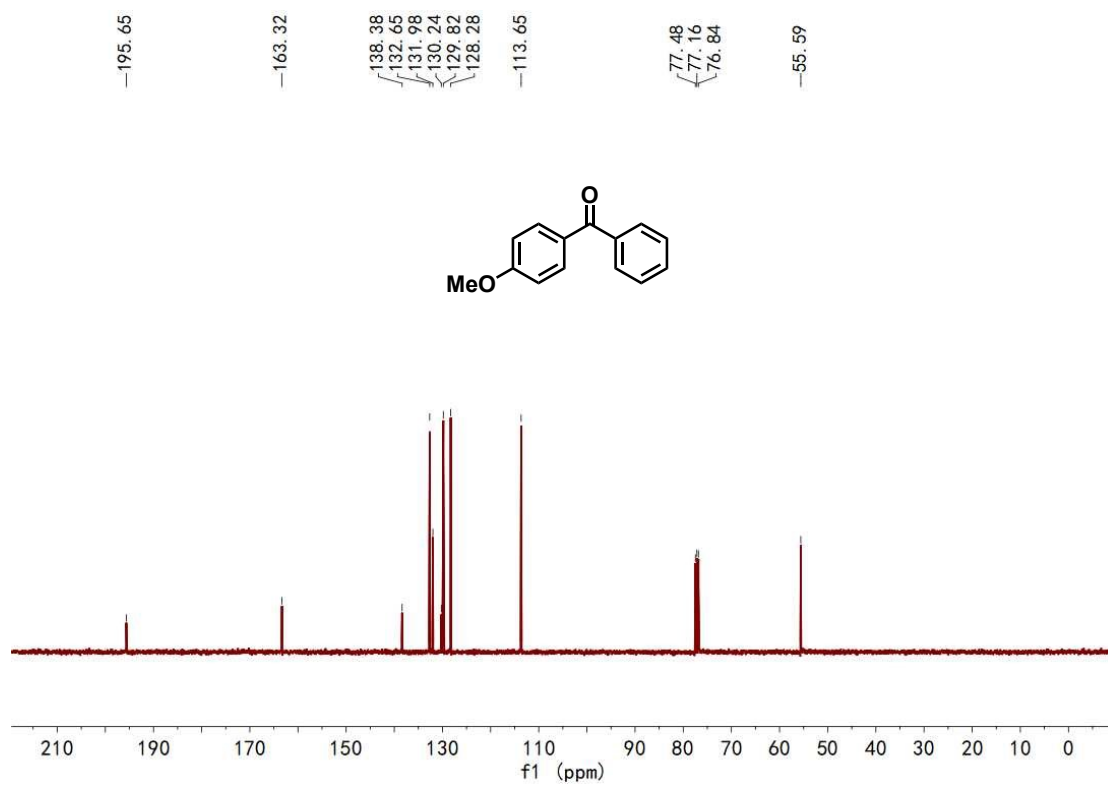

**Bis(4-(diethylamino)phenyl)methanone (6d):  $^1\text{H}$  NMR (400 MHz,  $\text{CDCl}_3$ )**

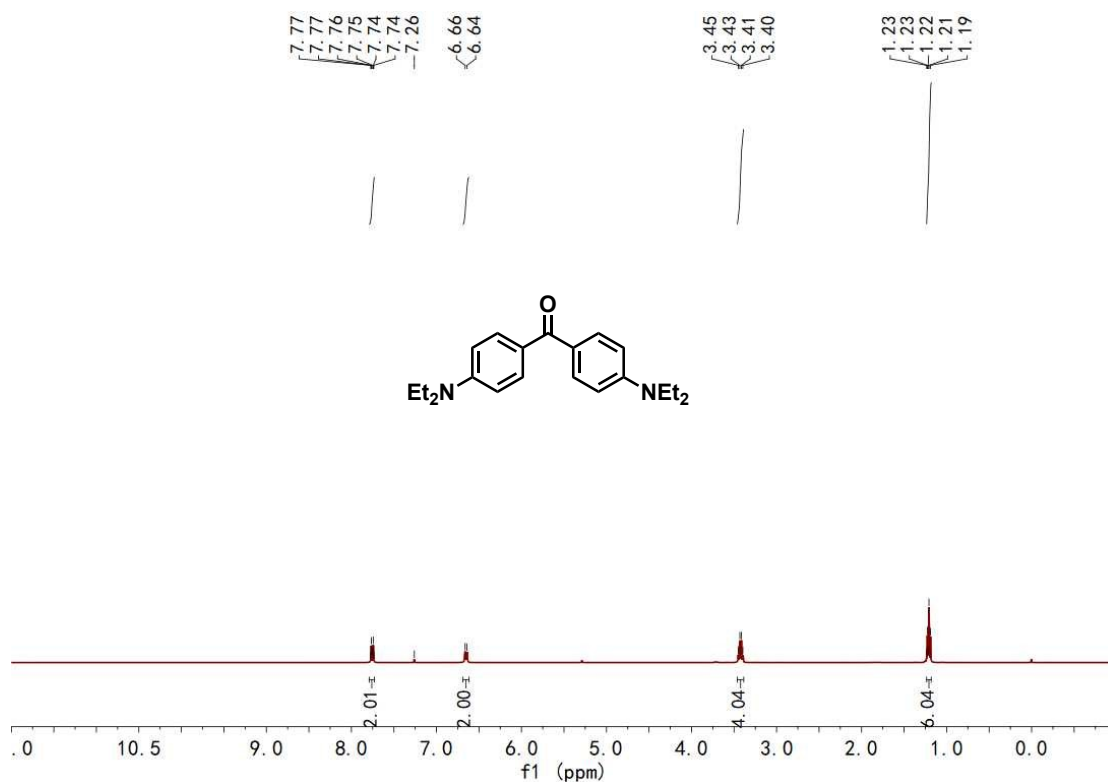

**Bis(4-(diethylamino)phenyl)methanone (6d):  $^{13}\text{C}\{^1\text{H}\}$  NMR (101 MHz,  $\text{CDCl}_3$ )**

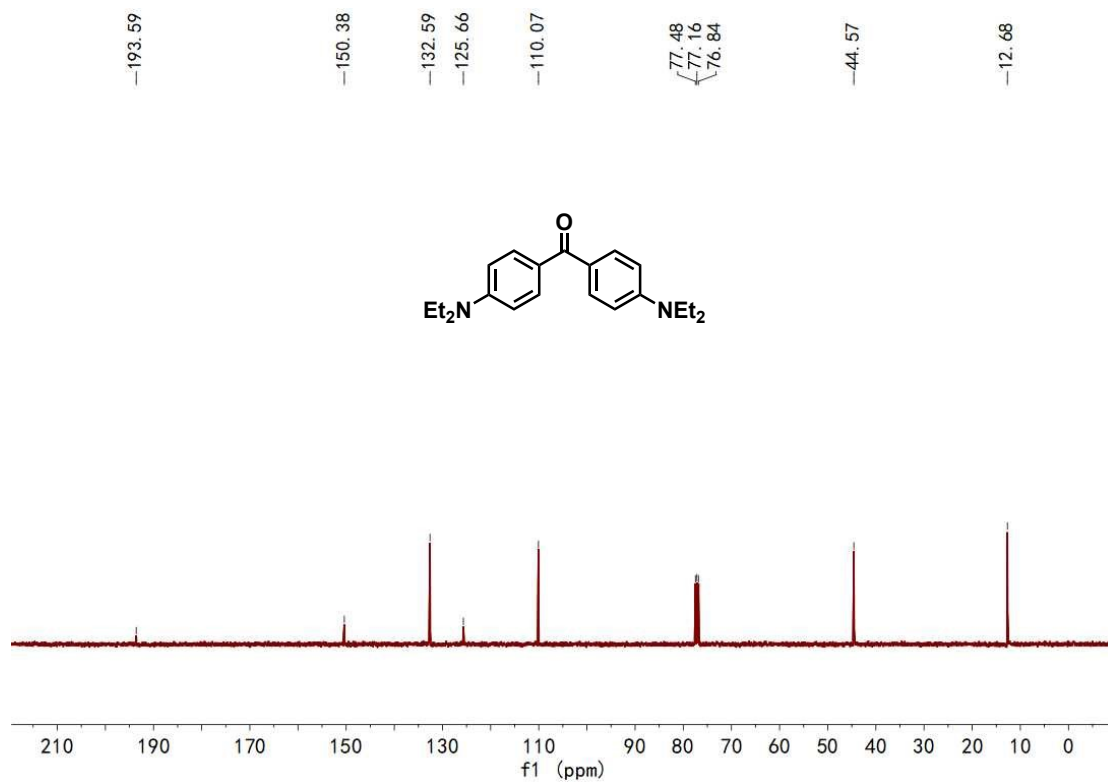

**Bis(4-bromophenyl)methanone (6e):  $^1\text{H}$  NMR (400 MHz,  $\text{CDCl}_3$ )**

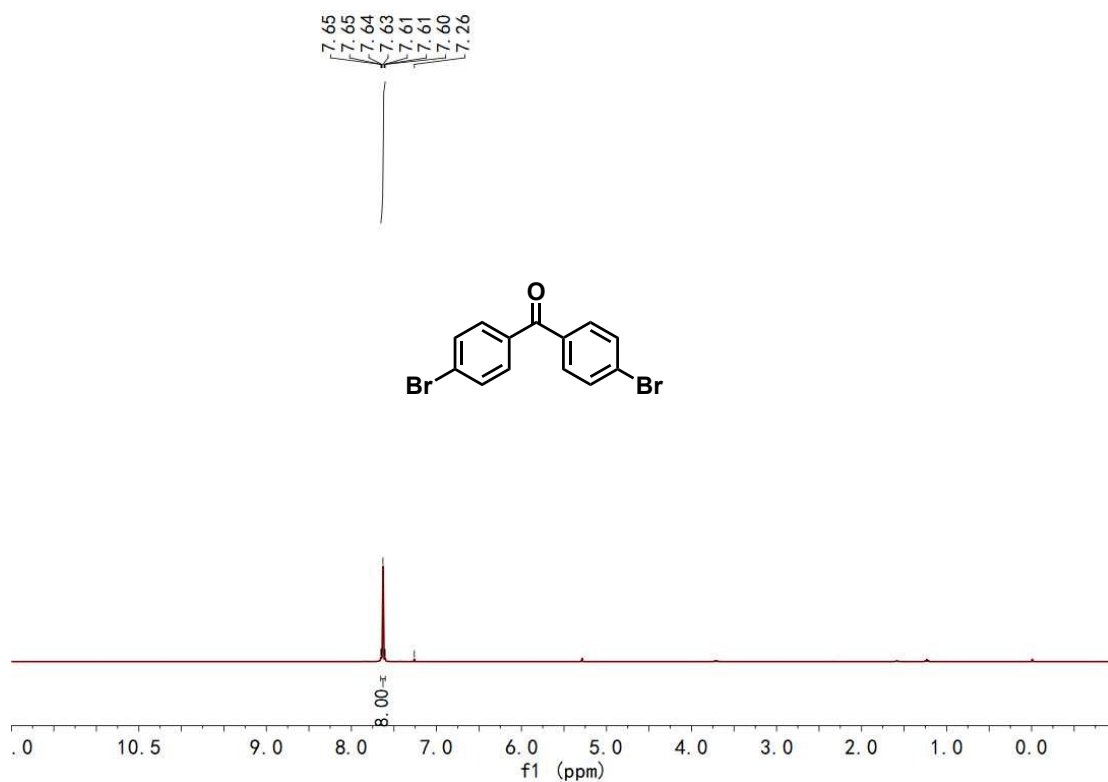

**Bis(4-bromophenyl)methanone (6e):  $^{13}\text{C}\{^1\text{H}\}$  NMR (101 MHz,  $\text{CDCl}_3$ )**

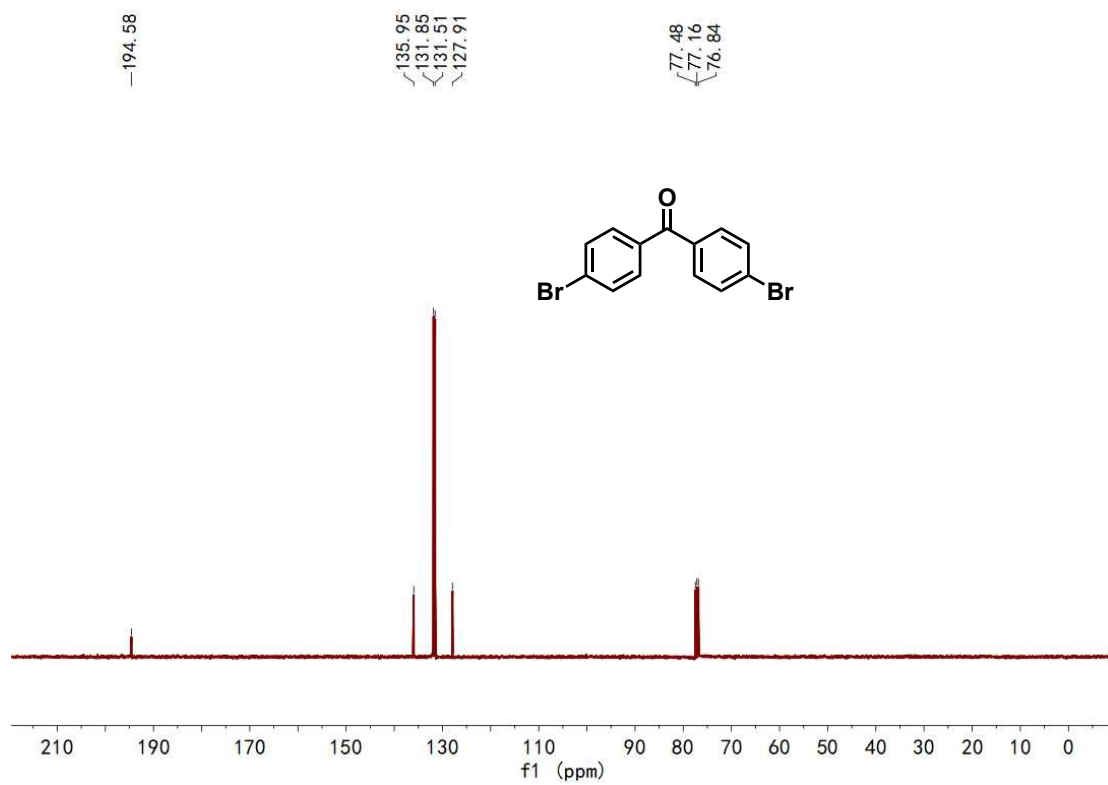

**(4-Chlorophenyl)(phenyl)methanone (6f):  $^1\text{H}$  NMR (400 MHz,  $\text{CDCl}_3$ )**

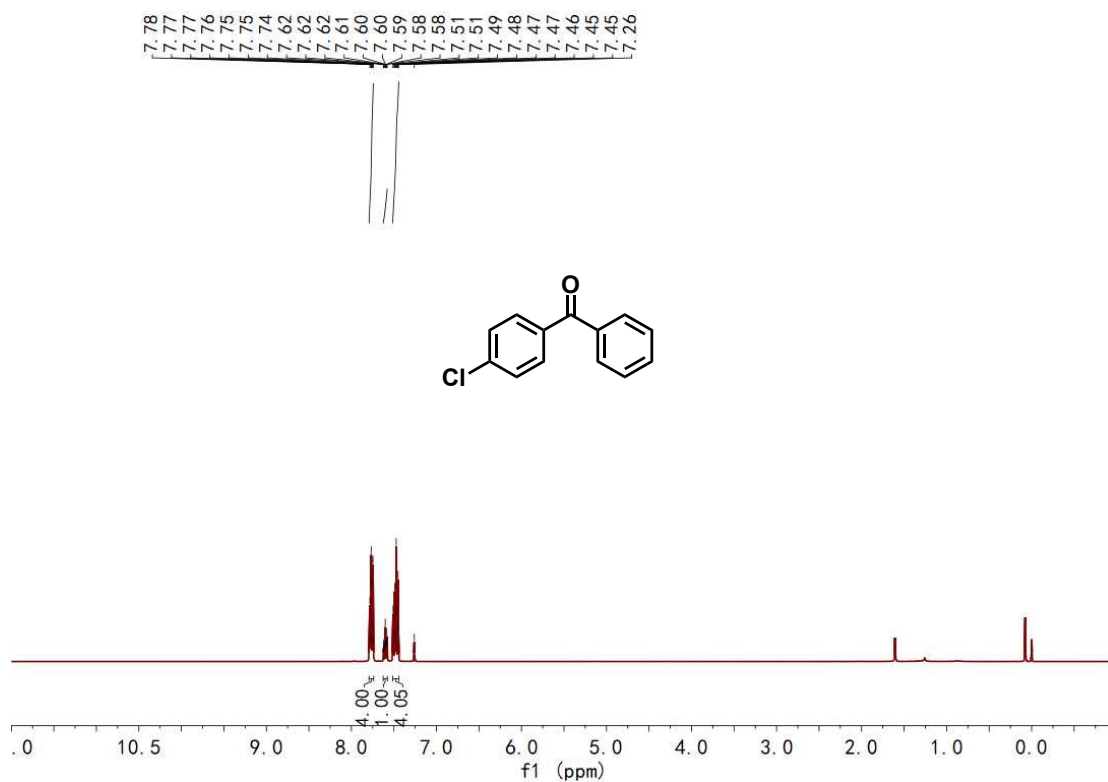

**(4-Chlorophenyl)(phenyl)methanone (6f):  $^{13}\text{C}\{^1\text{H}\}$  NMR (101 MHz,  $\text{CDCl}_3$ )**

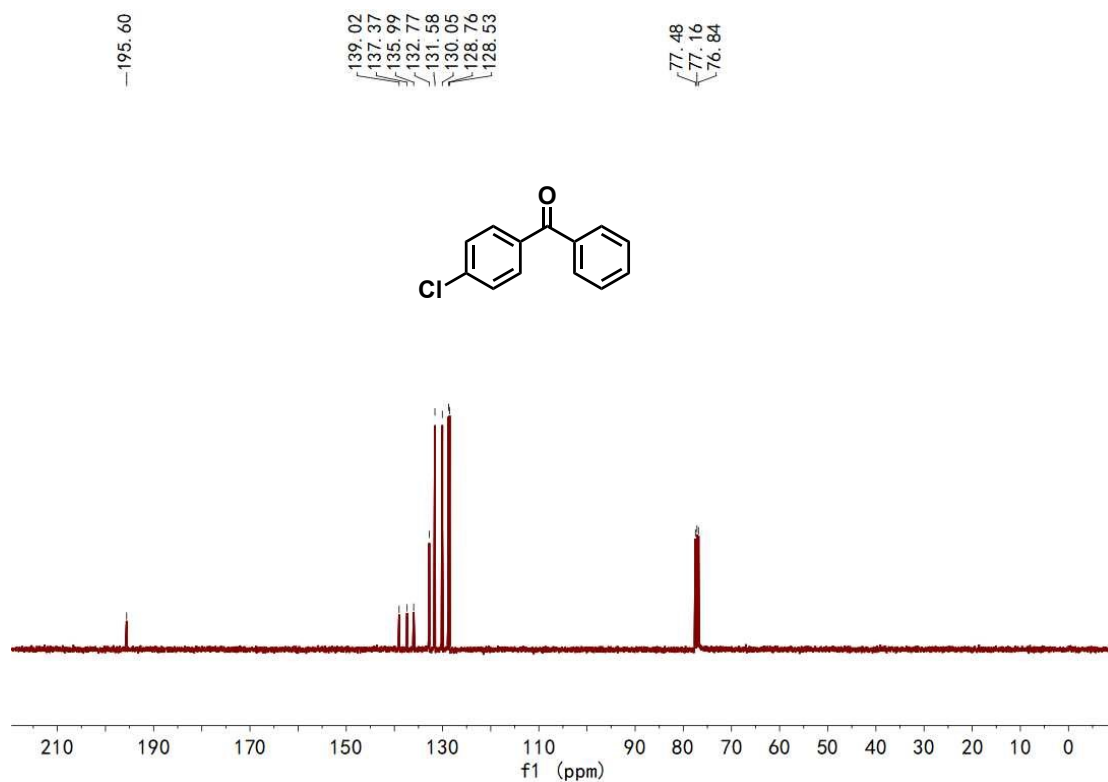

**(4-Fluorophenyl)(phenyl)methanone (6g):  $^1\text{H}$  NMR (400 MHz,  $\text{CDCl}_3$ )**

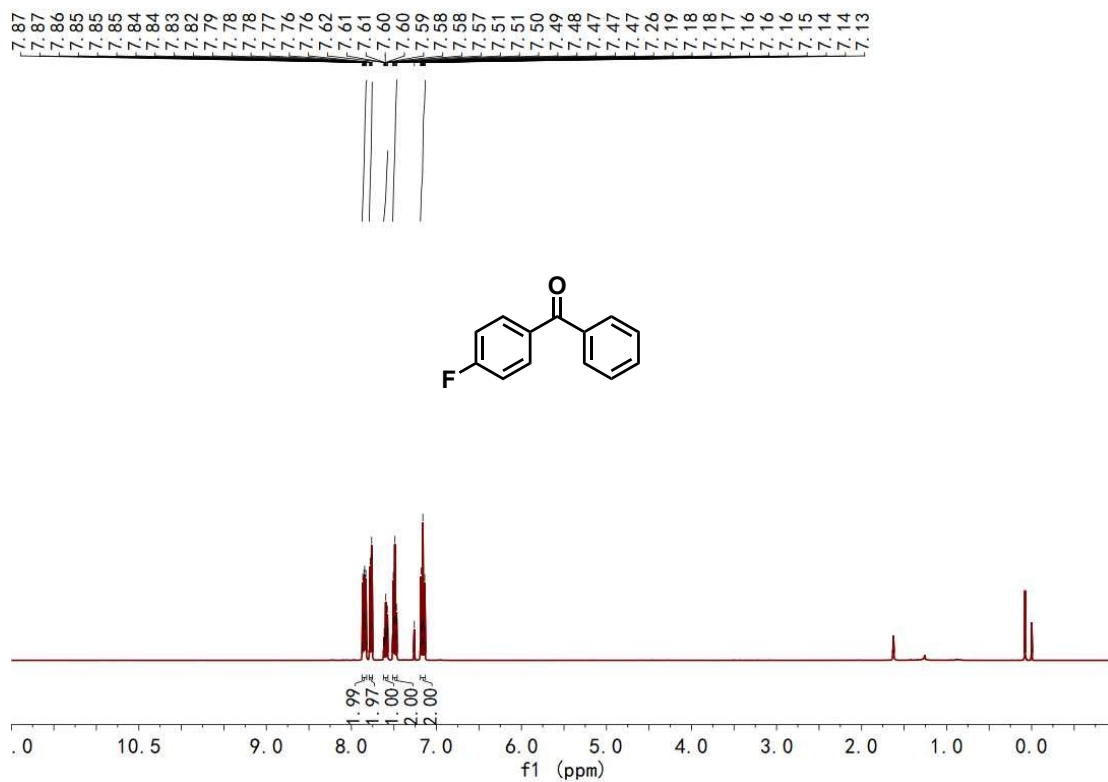

**(4-Fluorophenyl)(phenyl)methanone (6g):  $^{13}\text{C}\{^1\text{H}\}$  NMR (101 MHz,  $\text{CDCl}_3$ )**

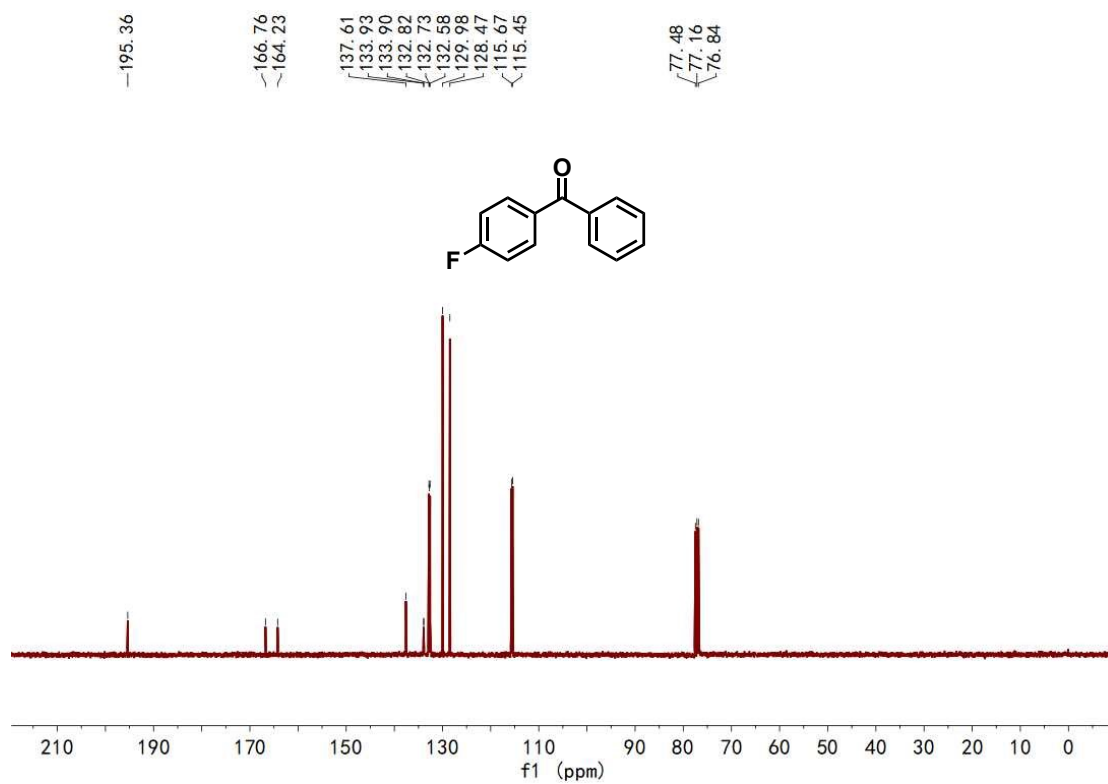

(4-Fluorophenyl)(phenyl)methanone (6g):  $^{19}\text{F}$  NMR (376 MHz,  $\text{CDCl}_3$ )

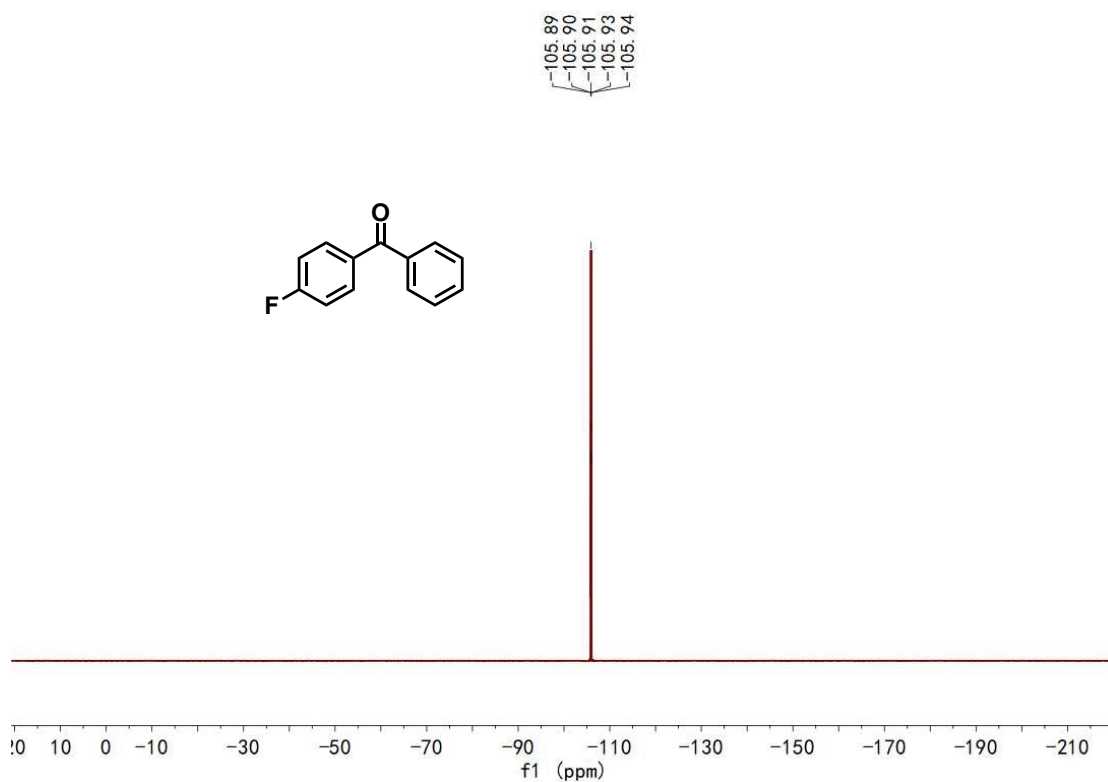

Phenyl(pyridin-2-yl)methanone (6h):  $^1\text{H}$  NMR (400 MHz,  $\text{CDCl}_3$ )

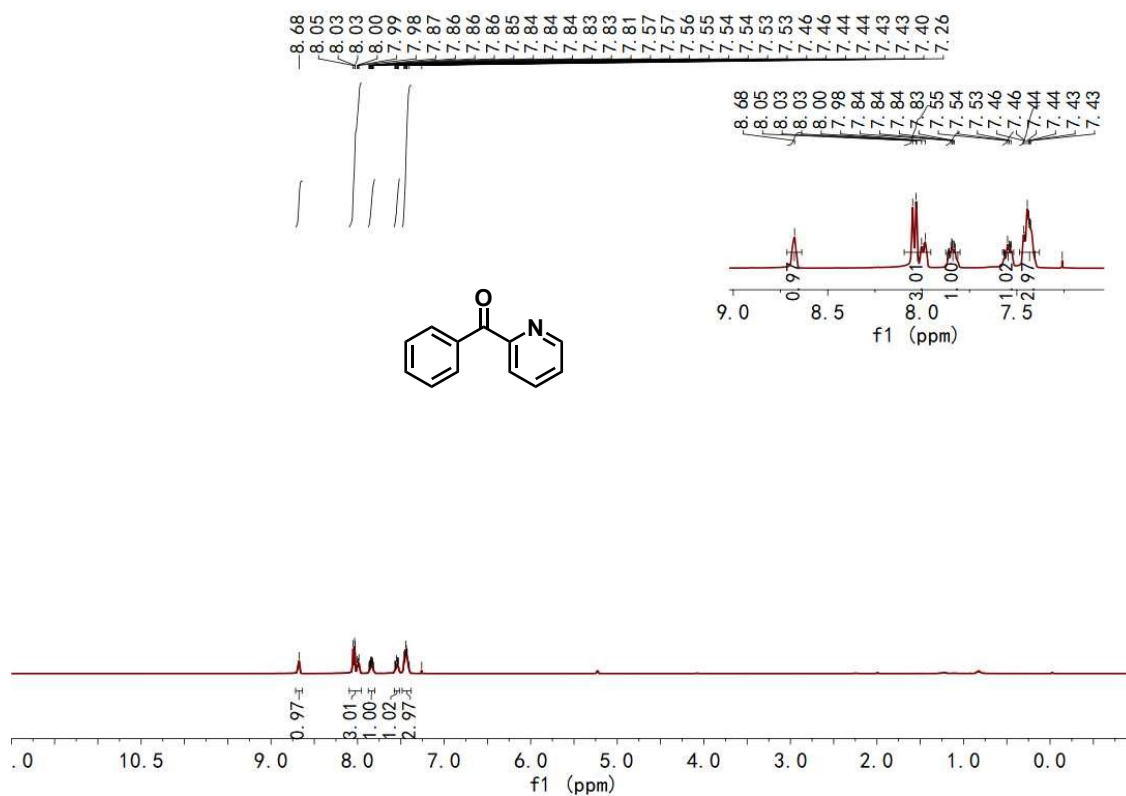

**Phenyl(pyridin-2-yl)methanone (6h):  $^{13}\text{C}\{^1\text{H}\}$  NMR (101 MHz,  $\text{CDCl}_3$ )**

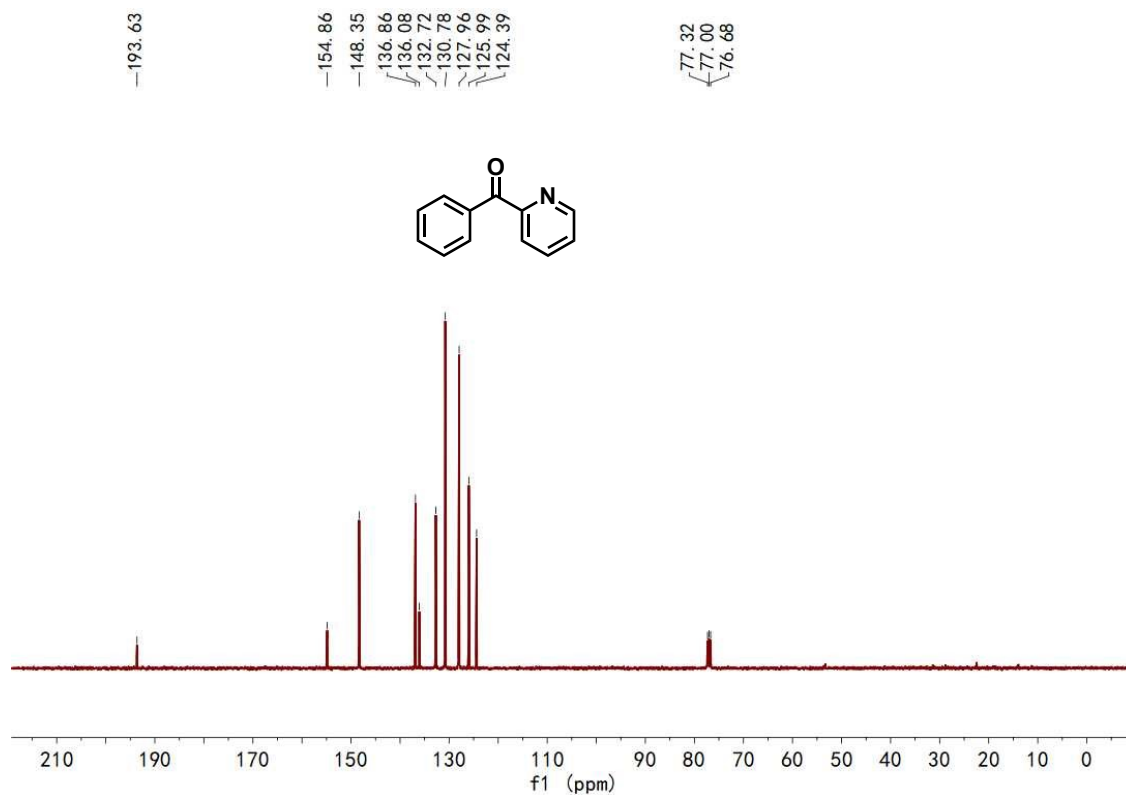

**Cyclohexyl(phenyl)methanone (6i):  $^1\text{H}$  NMR (400 MHz,  $\text{CDCl}_3$ )**

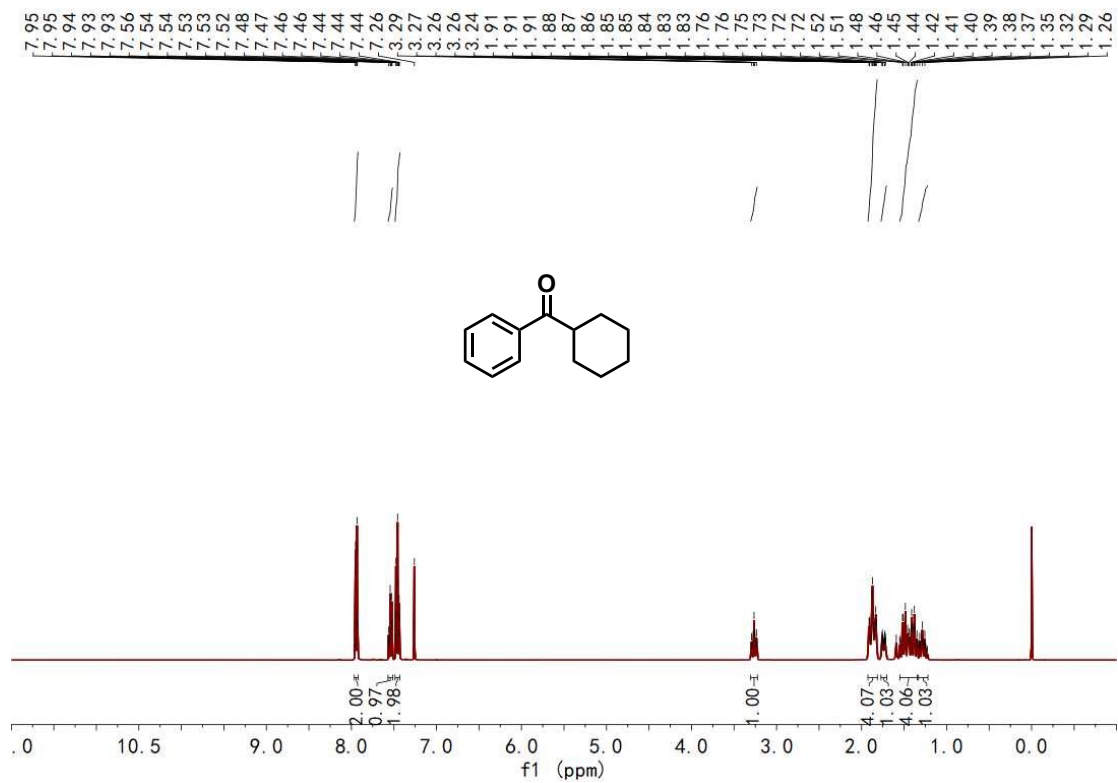

**Cyclohexyl(phenyl)methanone (6i):  $^{13}\text{C}\{^1\text{H}\}$  NMR (101 MHz,  $\text{CDCl}_3$ )**

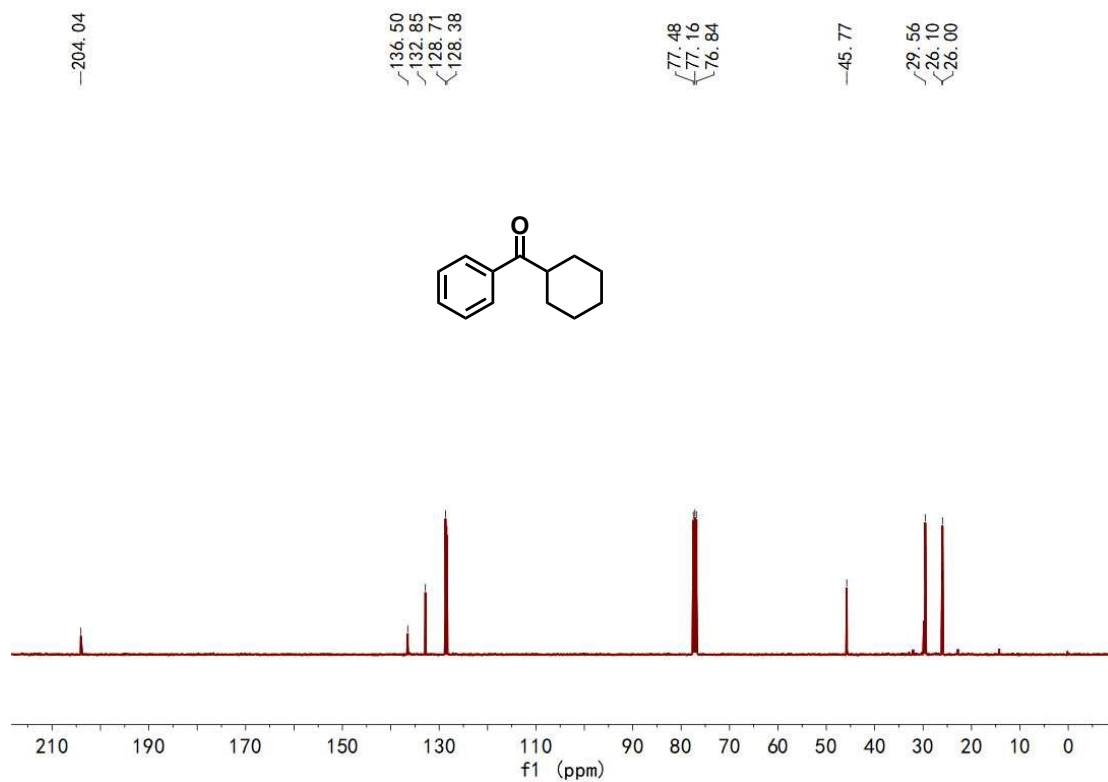

**1-(*p*-Tolyl)ethan-1-one (6k):  $^1\text{H}$  NMR (400 MHz,  $\text{CDCl}_3$ )**

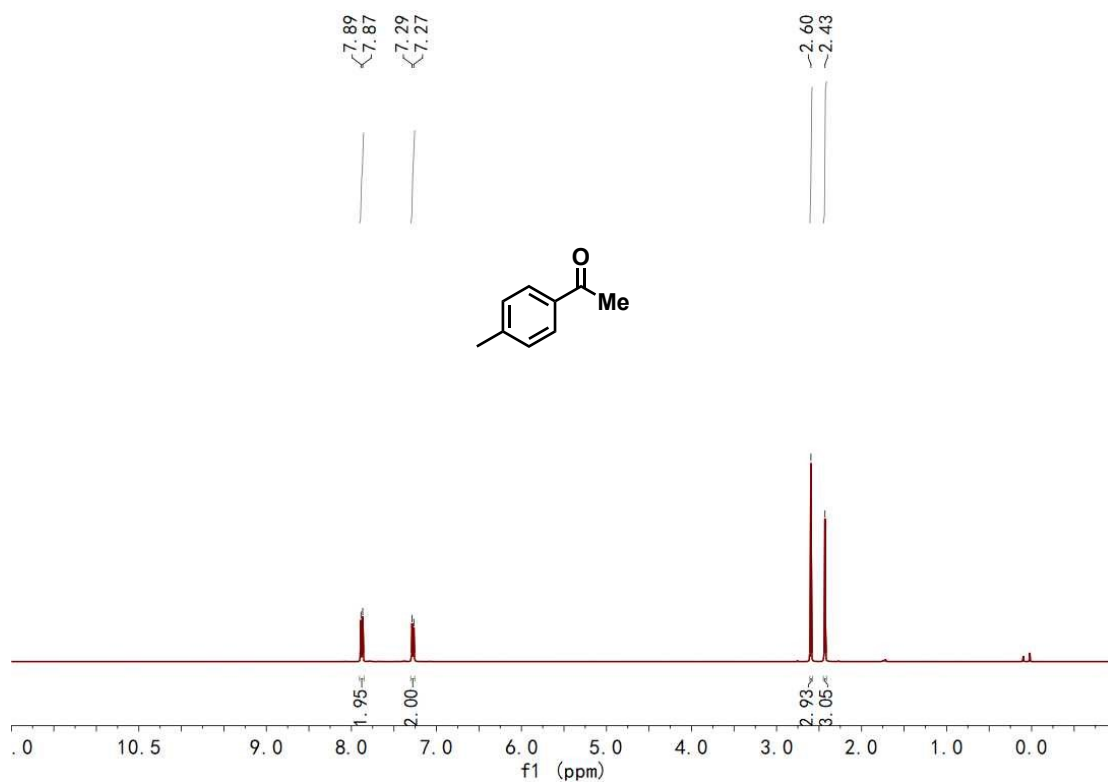

**1-(*p*-Tolyl)ethan-1-one (6k):  $^{13}\text{C}\{^1\text{H}\}$  NMR (101 MHz,  $\text{CDCl}_3$ )**

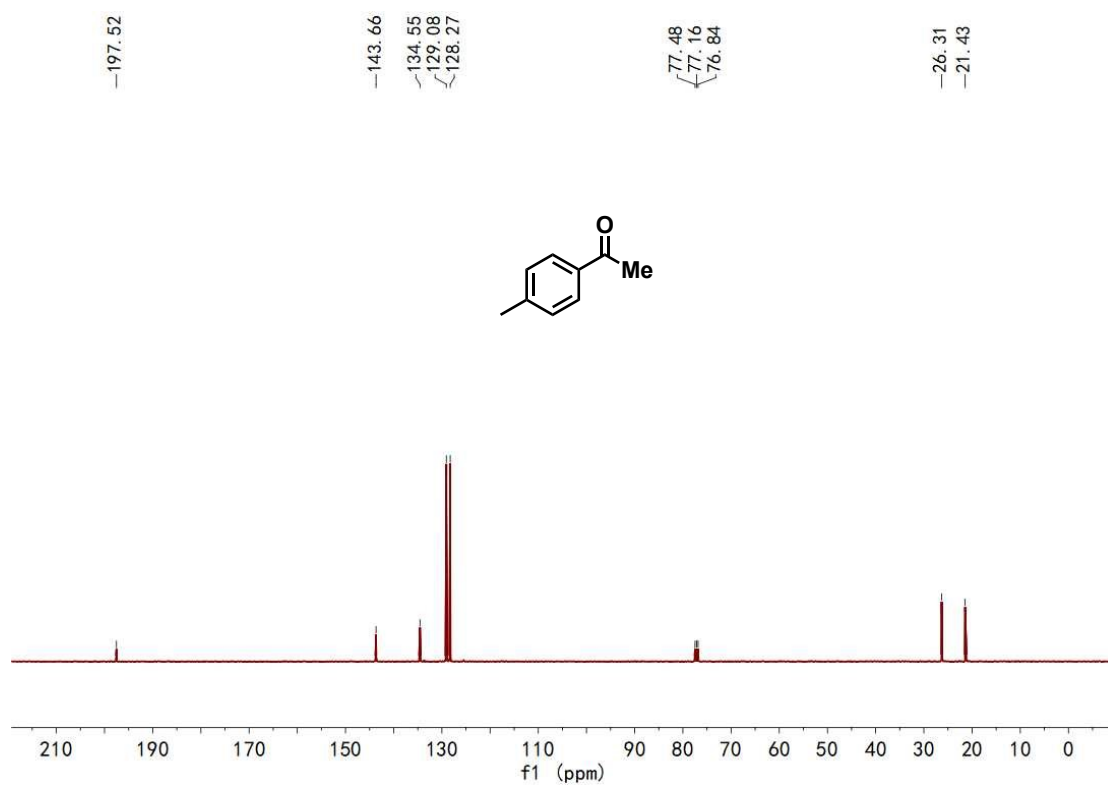

**1-(4-Fluorophenyl)ethan-1-one (6l):  $^1\text{H}$  NMR (400 MHz,  $\text{CDCl}_3$ )**

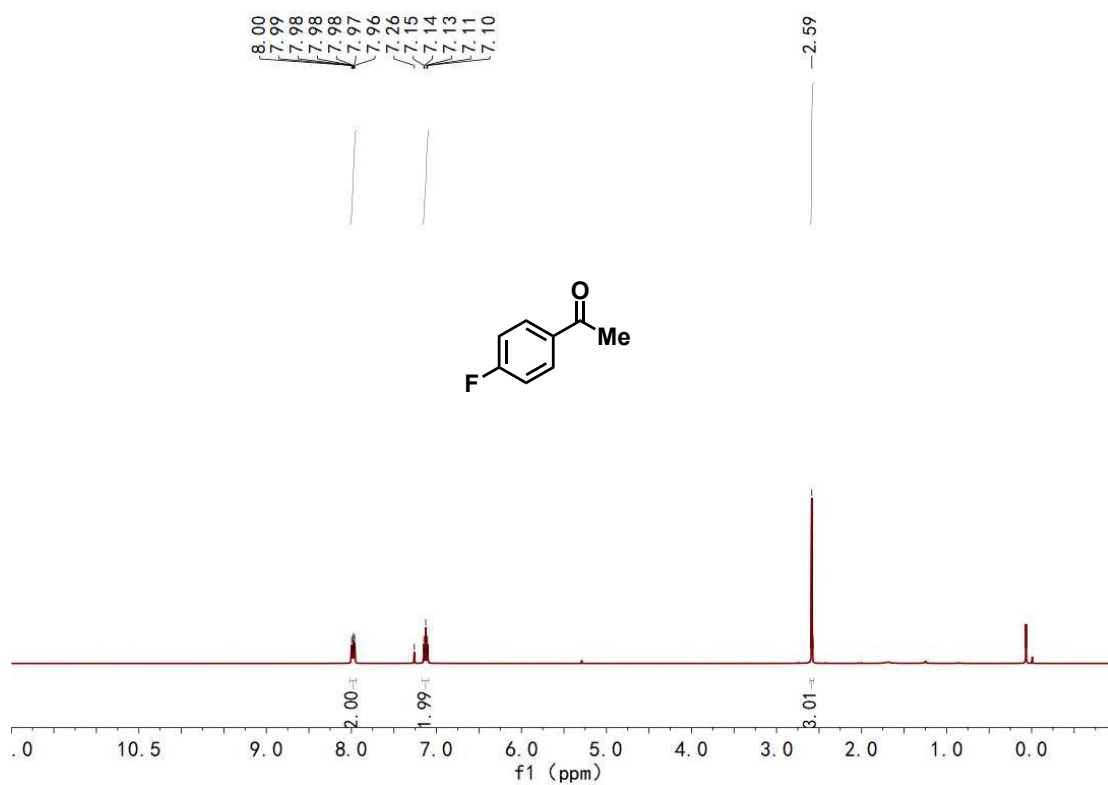

**(4-Fluorophenyl)ethan-1-one (6l):  $^{13}\text{C}\{^1\text{H}\}$  NMR (101 MHz,  $\text{CDCl}_3$ )**

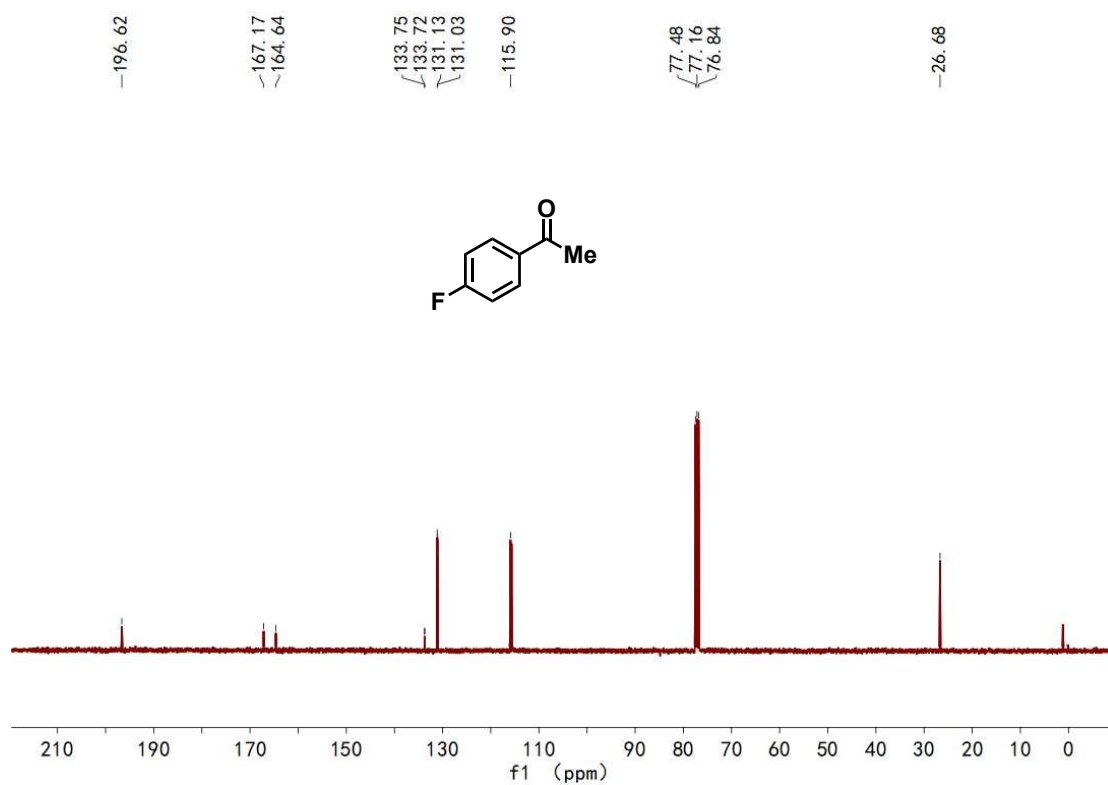

**1-(4-Fluorophenyl)ethan-1-one (6l):  $^{19}\text{F}$  NMR (376 MHz,  $\text{CDCl}_3$ )**

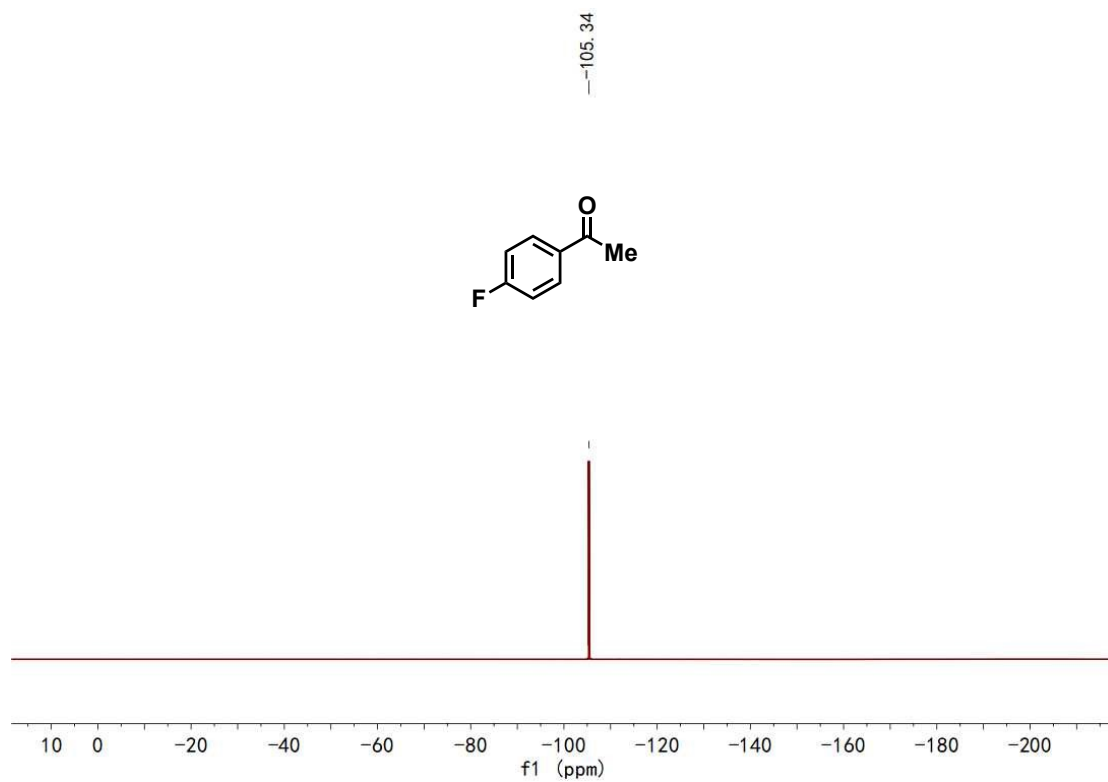

**1-(Naphthalen-2-yl)ethan-1-one (6m):  $^1\text{H}$  NMR (400 MHz,  $\text{CDCl}_3$ )**

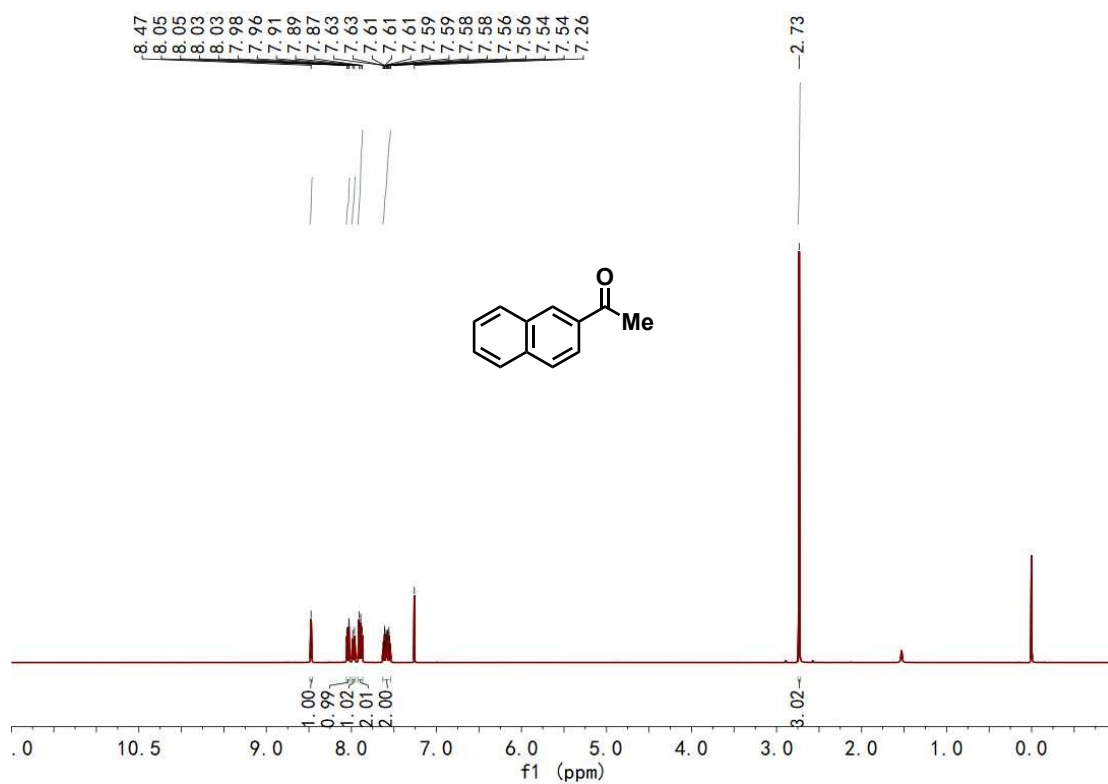

**1-(Naphthalen-2-yl)ethan-1-one (6m):  $^{13}\text{C}\{^1\text{H}\}$  NMR (101 MHz,  $\text{CDCl}_3$ )**

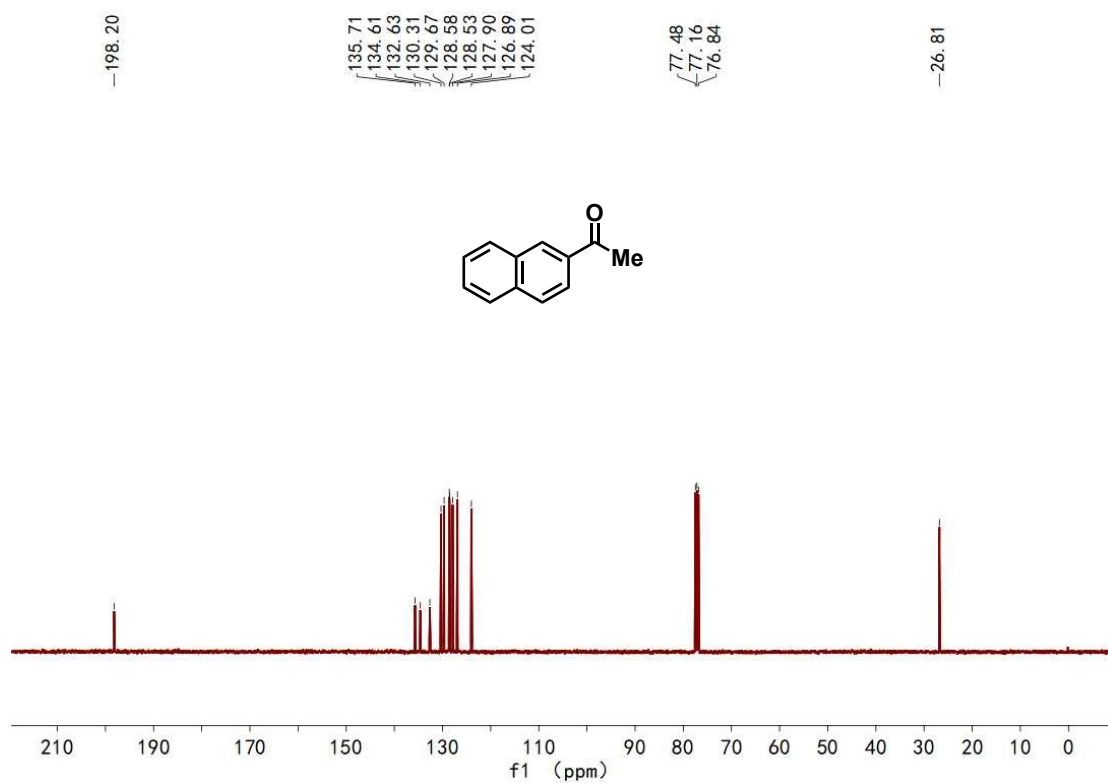

**1-(Pyridin-2-yl)ethan-1-one (6n):  $^1\text{H}$  NMR (400 MHz,  $\text{CDCl}_3$ )**

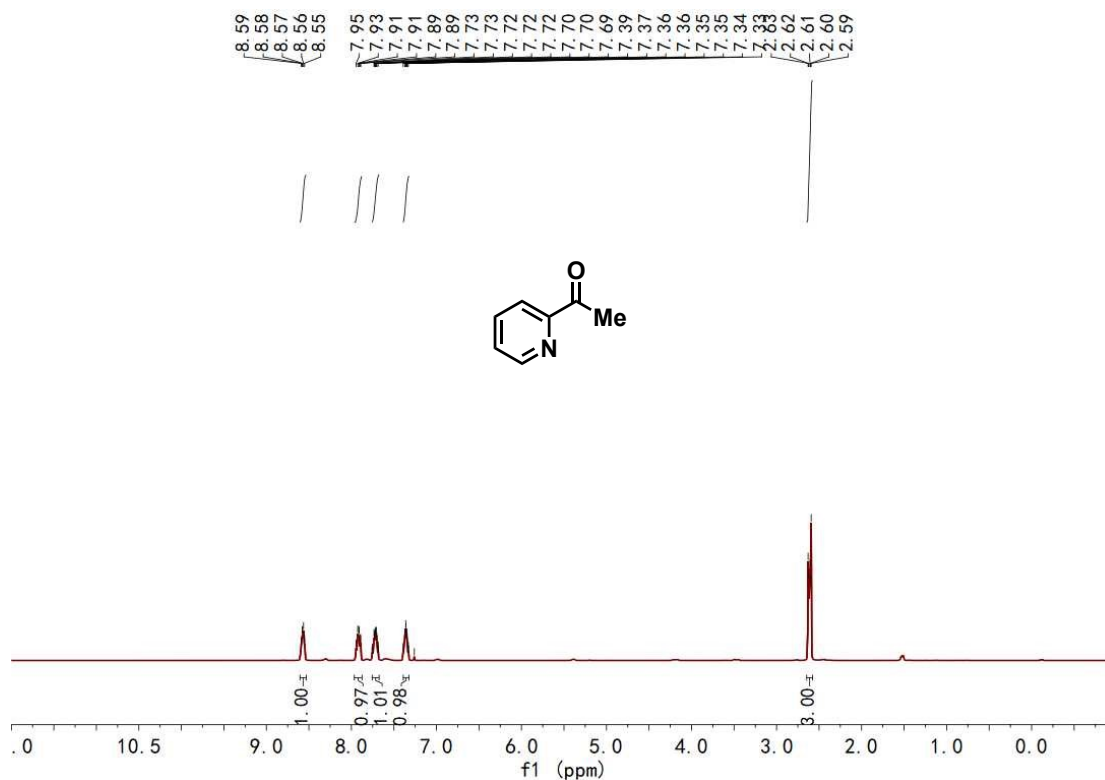

**1-(Pyridin-2-yl)ethan-1-one (6n):  $^{13}\text{C}\{^1\text{H}\}$  NMR (101 MHz,  $\text{CDCl}_3$ )**

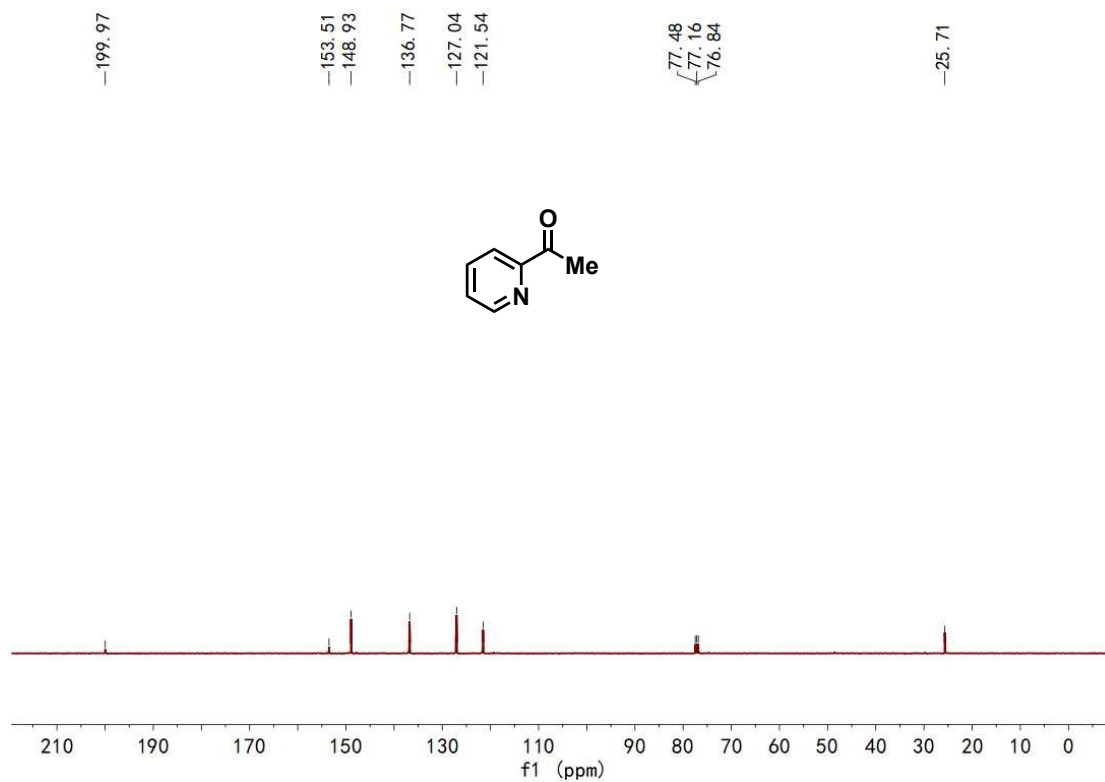

**9H-Fluoren-9-one (6o):  $^1\text{H}$  NMR (400 MHz,  $\text{CDCl}_3$ )**

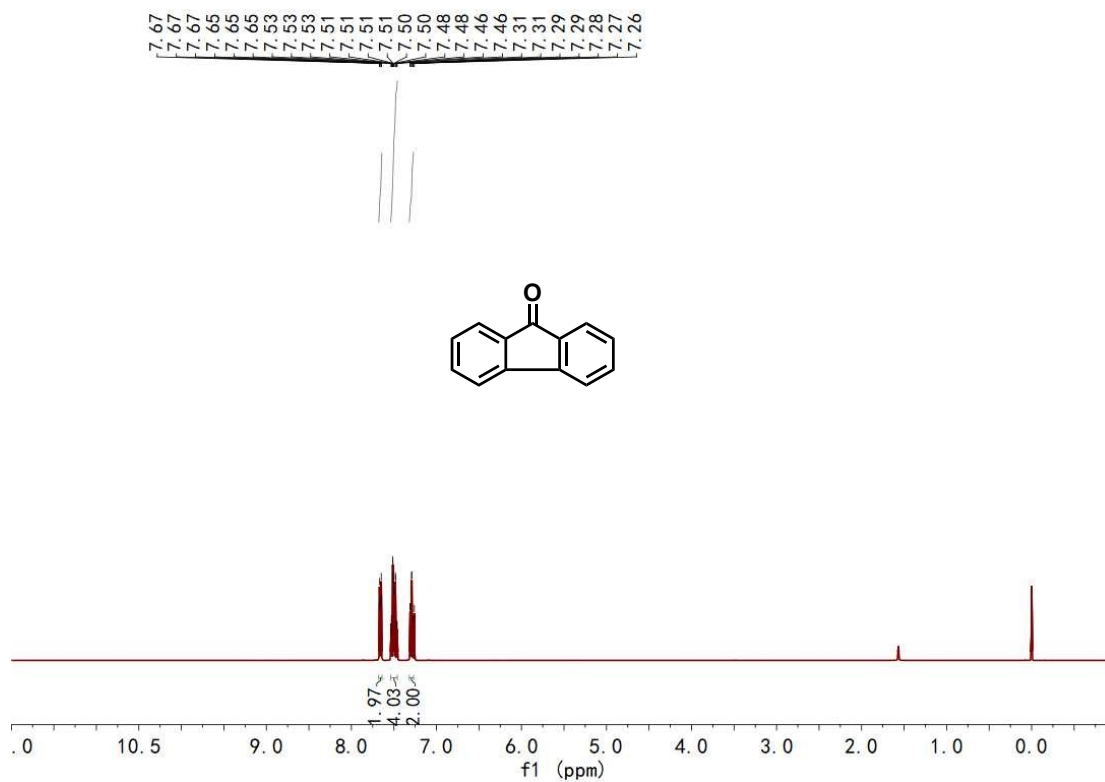

**9H-Fluoren-9-one (6o):  $^{13}\text{C}\{^1\text{H}\}$  NMR (101 MHz,  $\text{CDCl}_3$ )**

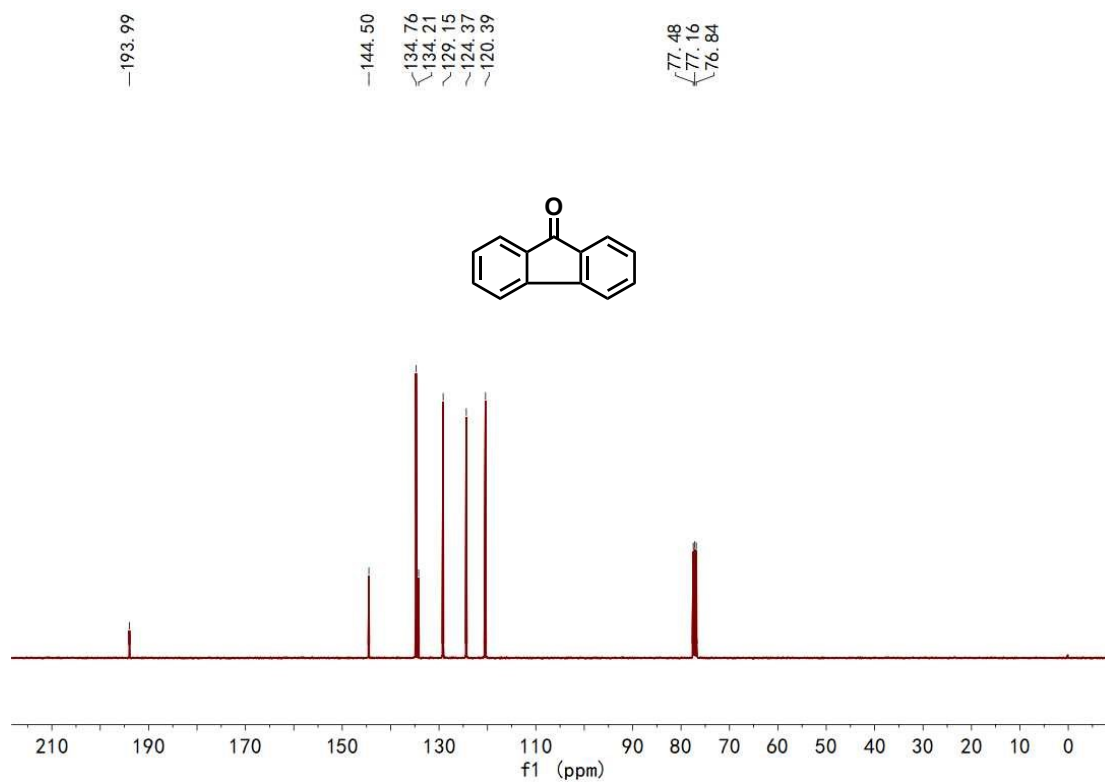

Supplement: d6qo00271d1.pdf [file d6qo00271d1.pdf]
